# Supplementary material for: Synthesis, characterization and optimization of in vitro properties of NIR-fluorescent cyclic α-MSH peptides for melanoma imaging
Source: Royal Society of Chemistry journal article supplement (doi:10.1039/d0tb01798a), 2020-01-01

# Synthesis, characterization and optimization of in vitro properties of NIR-fluorescent cyclic $\alpha$ -MSH peptides for melanoma imaging

Valeska von Kiedrowski,<sup>\*a</sup> Ralph Hübner,<sup>b</sup> Dagmar Kail,<sup>a</sup> Xia Cheng,<sup>a</sup> Ralf Schirmacher,<sup>c</sup> Carmen Wängler<sup>b</sup> and Björn Wängler<sup>\*a</sup>

## Supporting Information, Part 2

- a. Molecular Imaging and Radiochemistry, Department of Clinical Radiology and Nuclear Medicine, Medical Faculty Mannheim of Heidelberg University, Theodor-Kutzer-Ufer 1-3, 68167 Mannheim, Germany.
- b. Biomedical Chemistry, Department of Clinical Radiology and Nuclear Medicine, Medical Faculty Mannheim of Heidelberg University, Theodor-Kutzer-Ufer 1-3, 68167 Mannheim, Germany.
- c. Department of Oncology, Division of Oncological Imaging, University of Alberta, 11560 University Avenue, Edmonton, T6G 1Z2, Alberta, Canada.

### Table of Contents

|                                                                                 |    |
|---------------------------------------------------------------------------------|----|
| Copies of NMR spectra                                                           | 2  |
| Absorbance and Emission, Maldi-MS Spectra,<br>HPLC Chromatogramm ESI-MS Spectra | 21 |

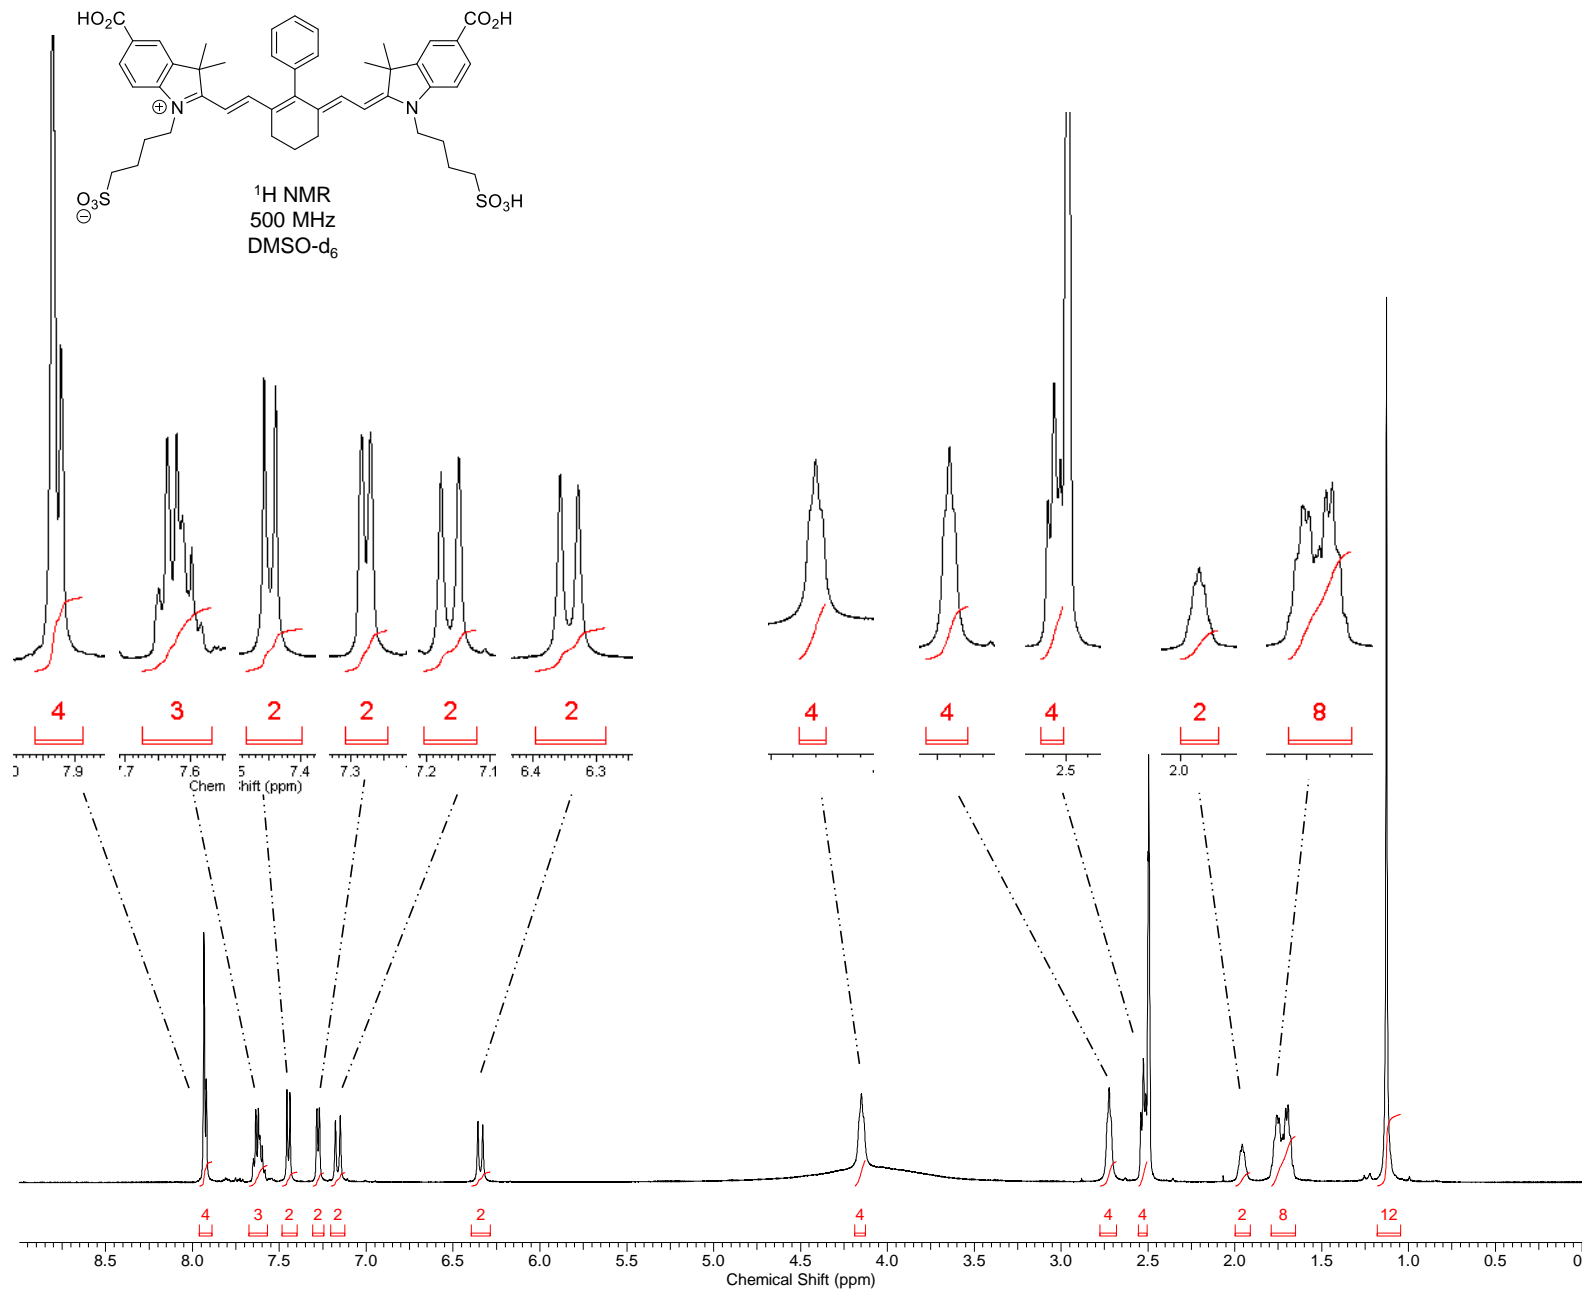

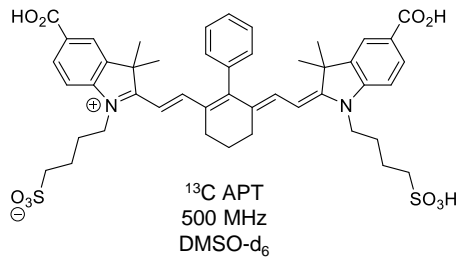

VK-4\_NEW\_APT\_500.ESP

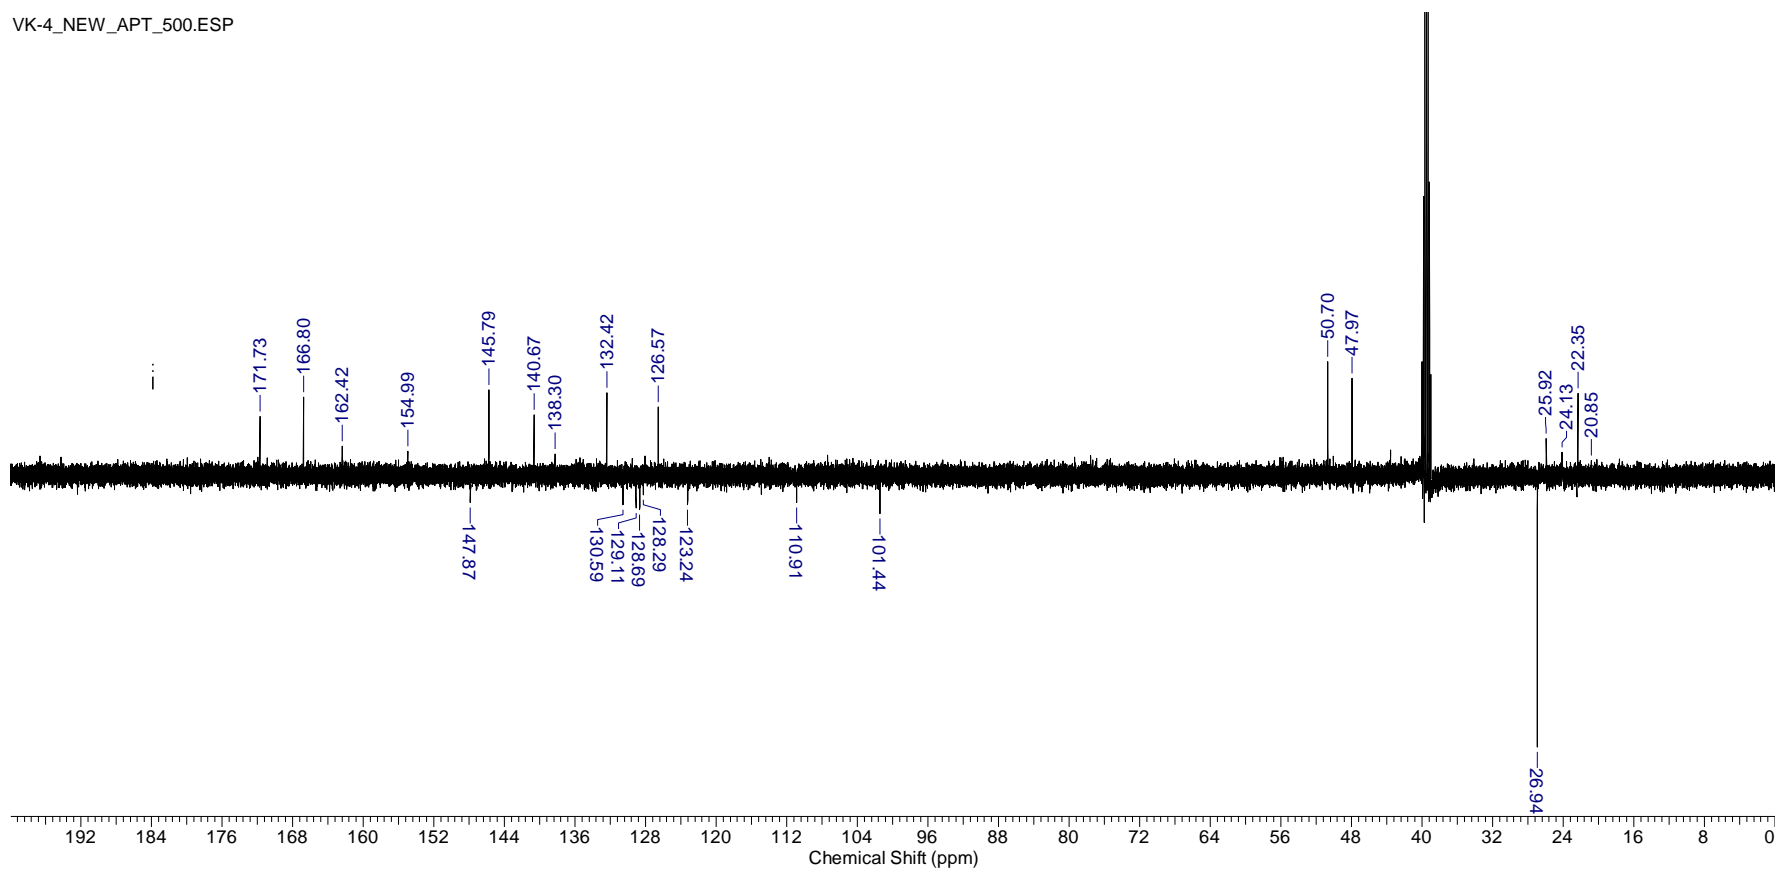

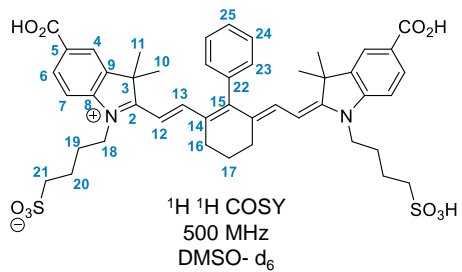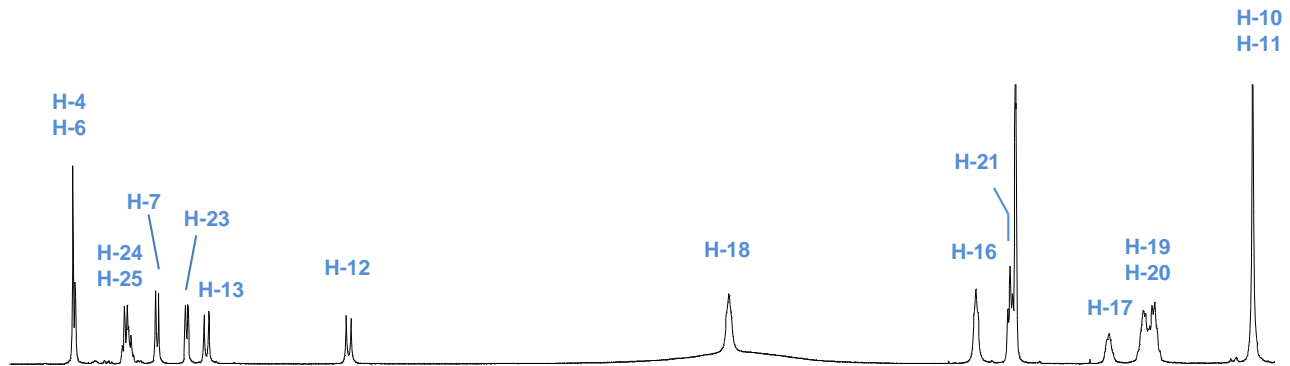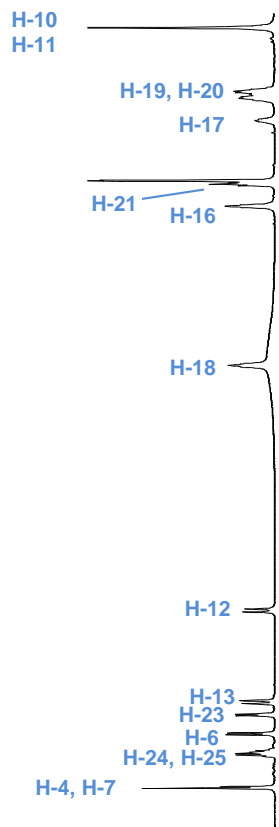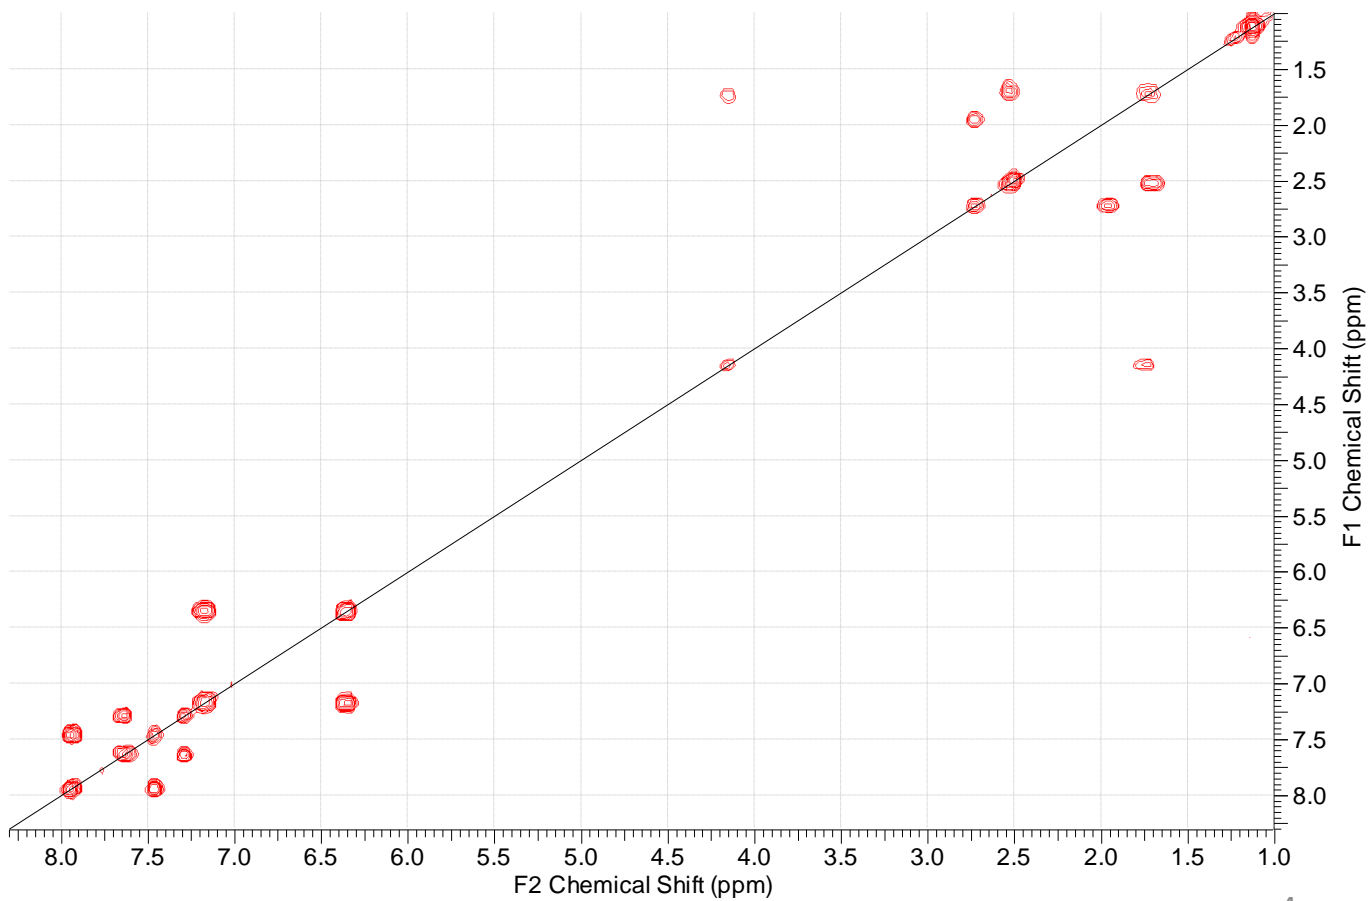

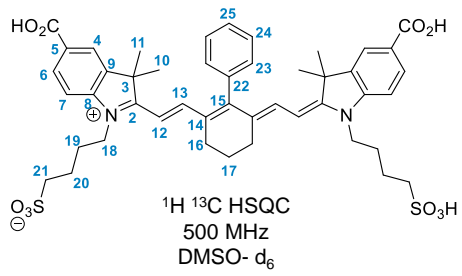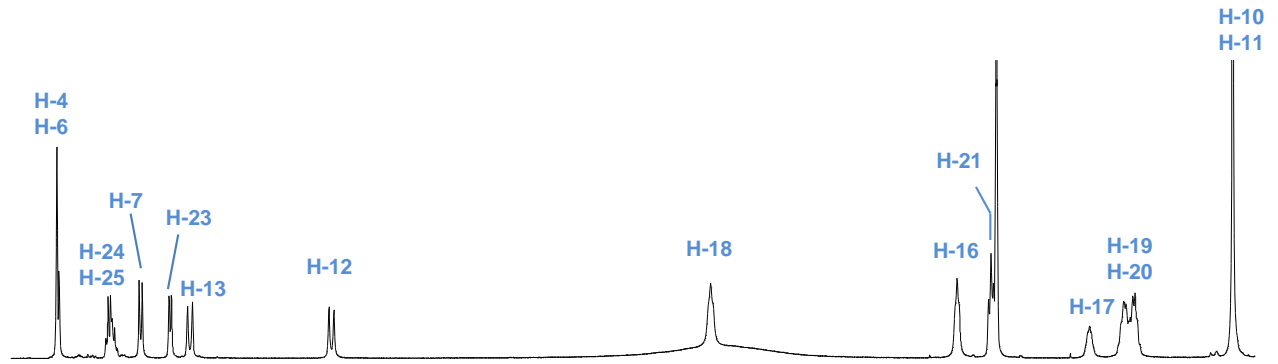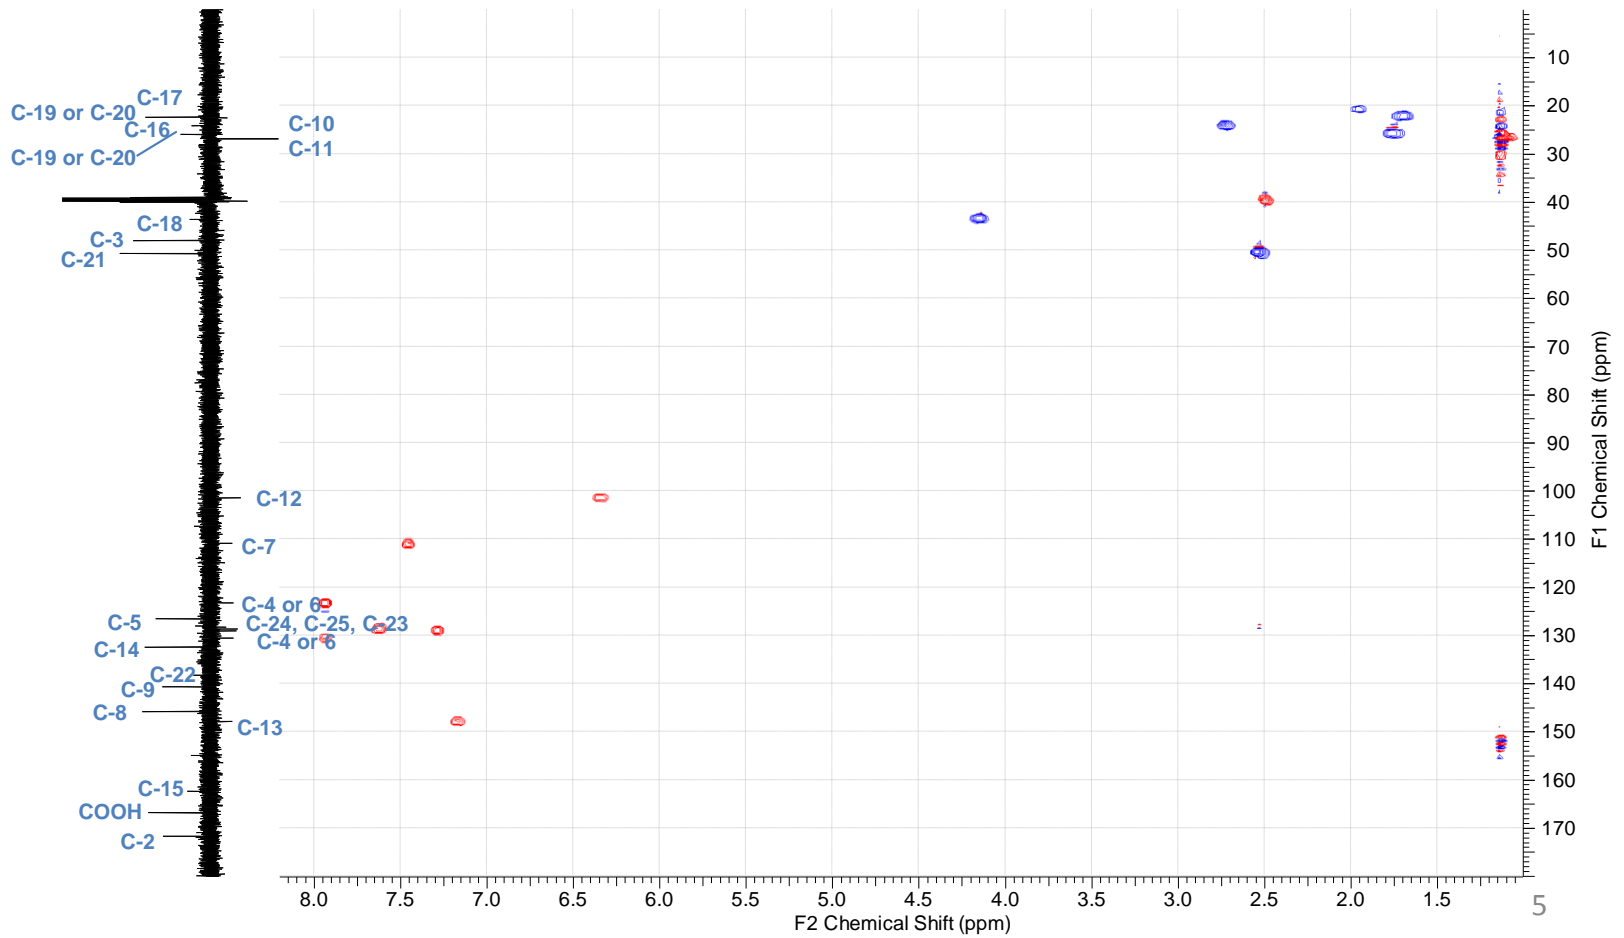

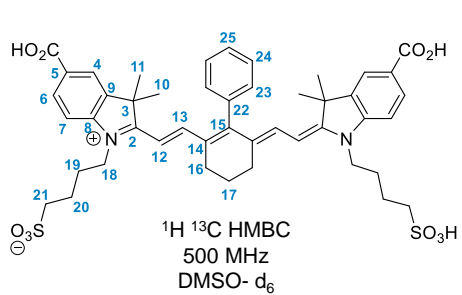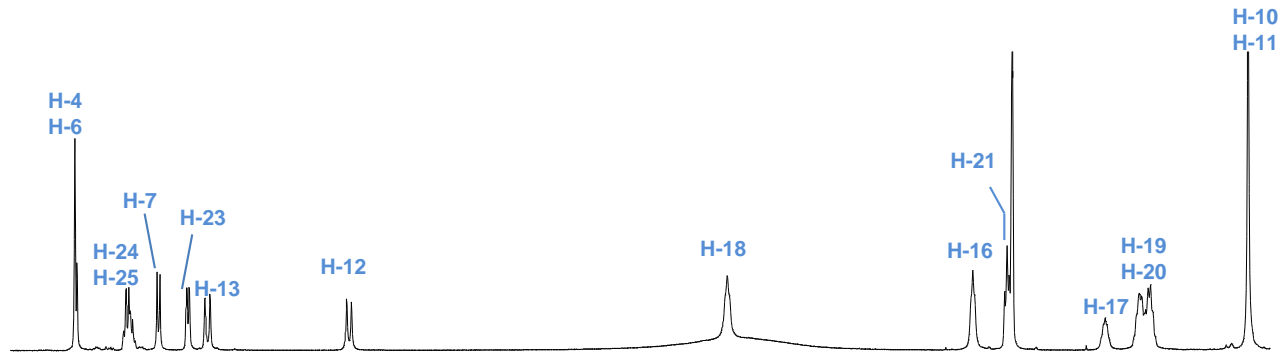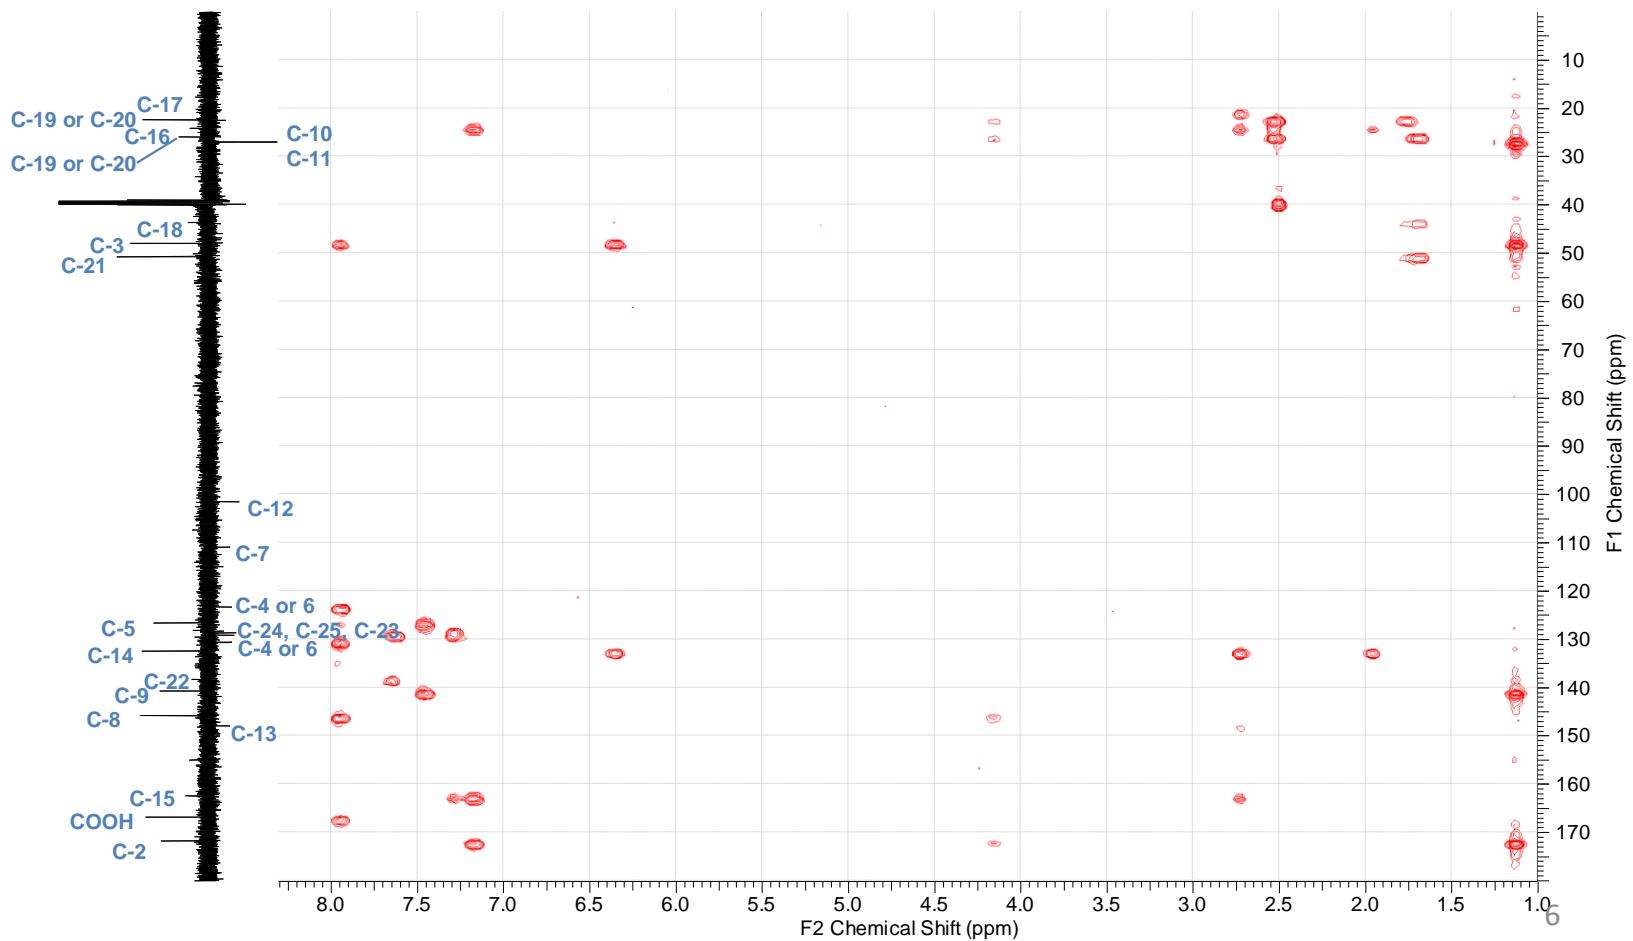

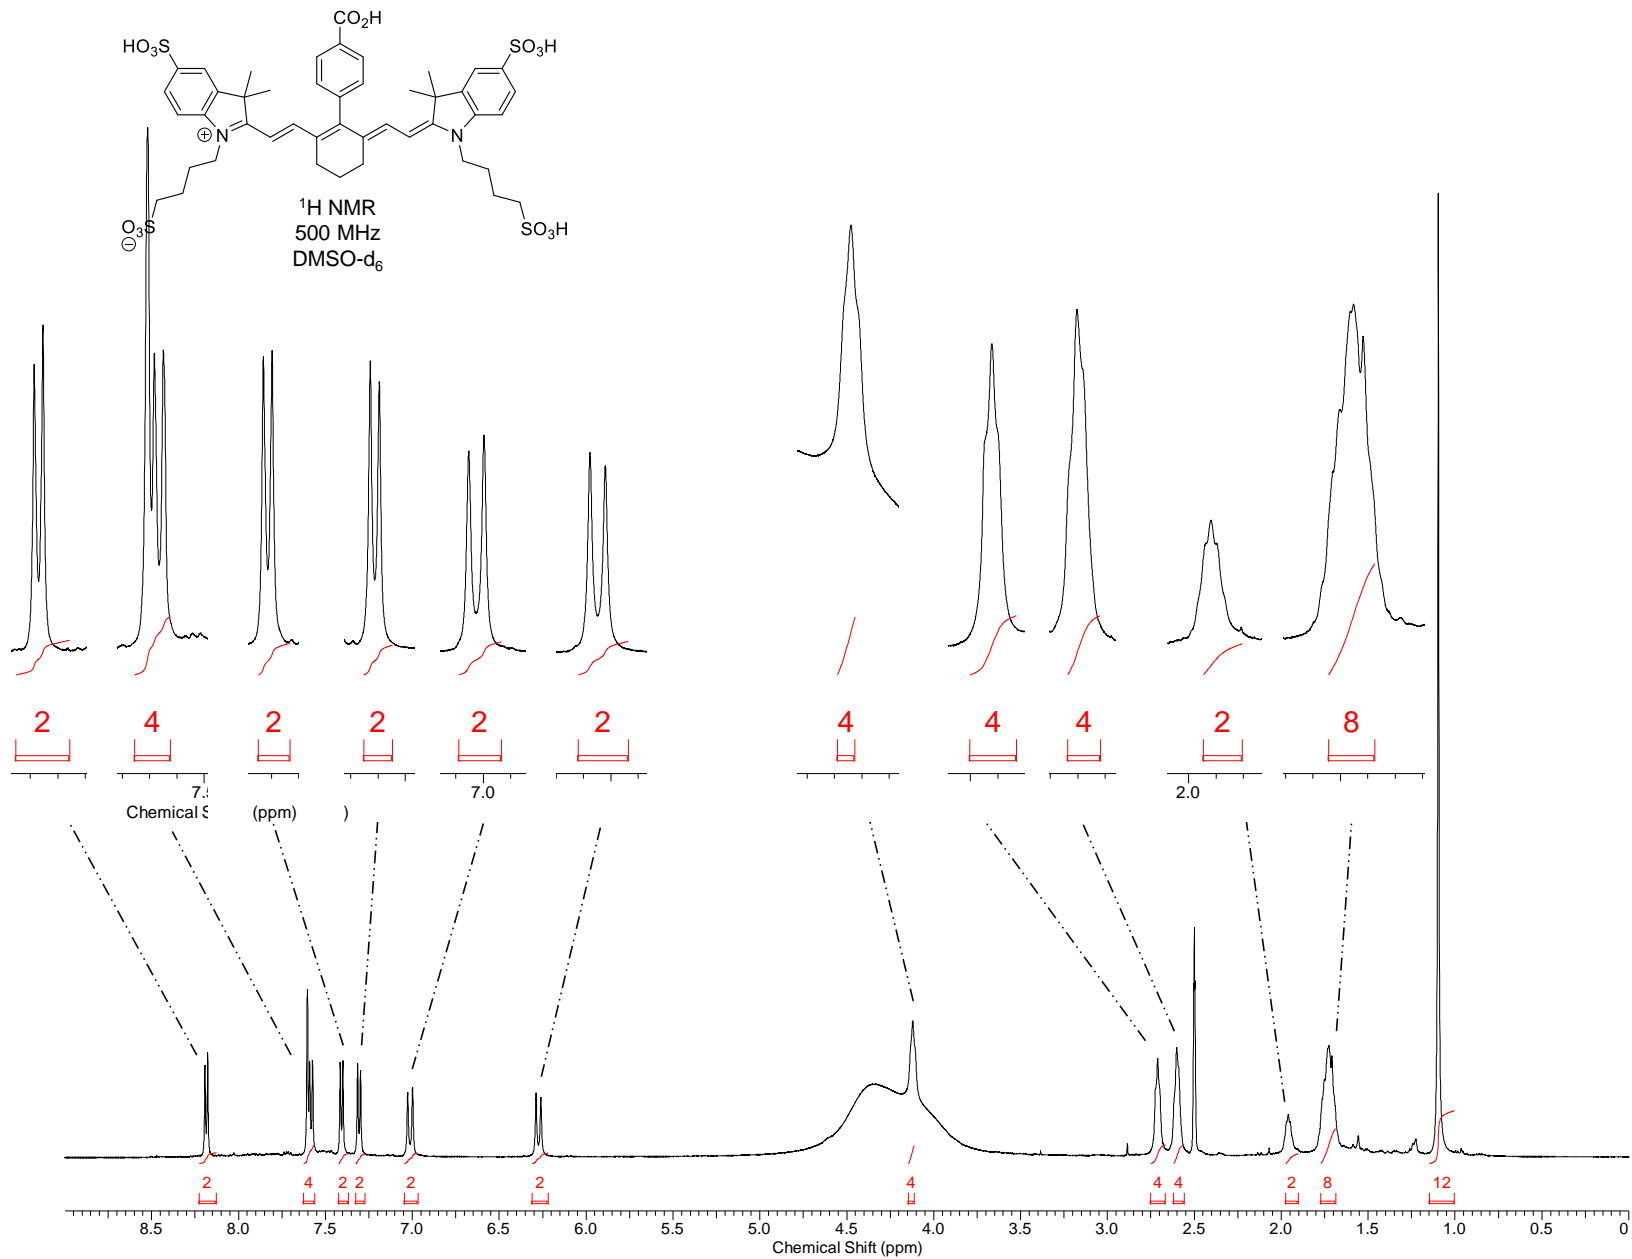

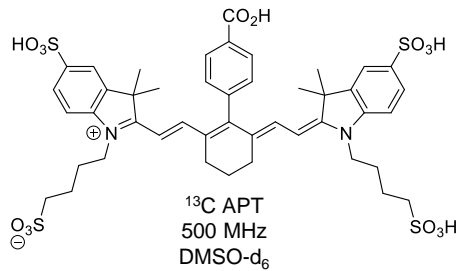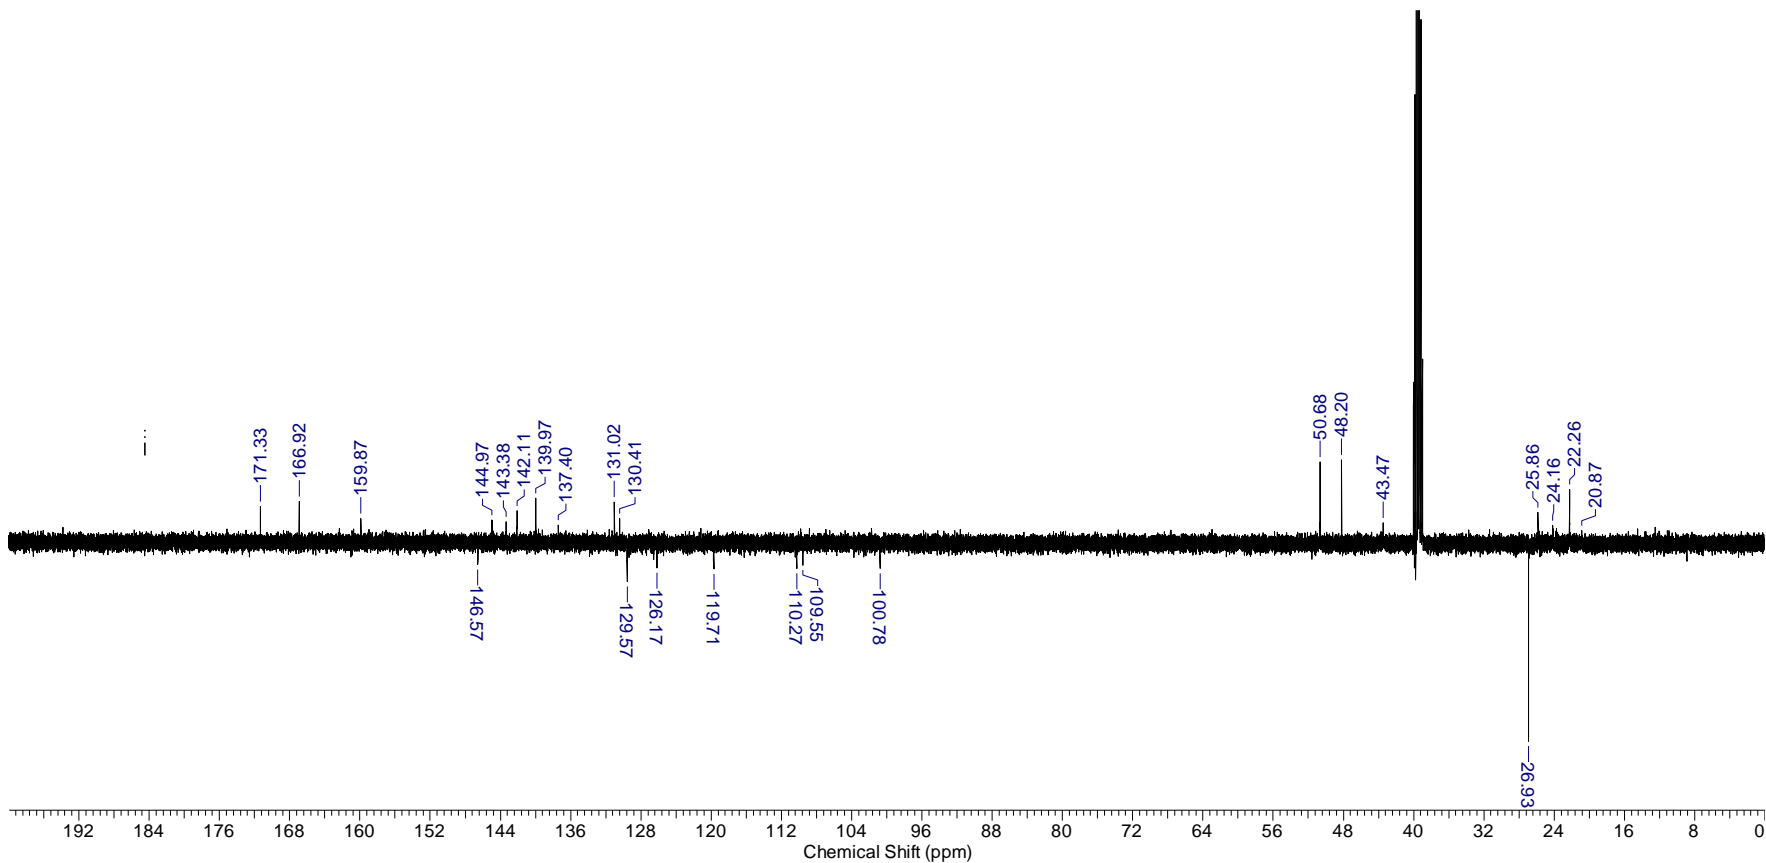



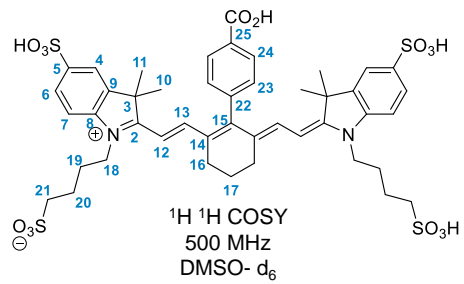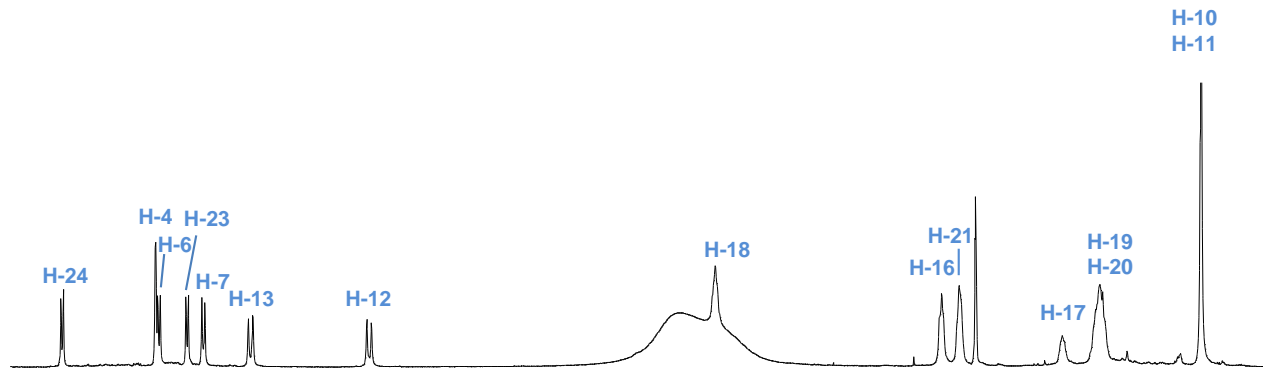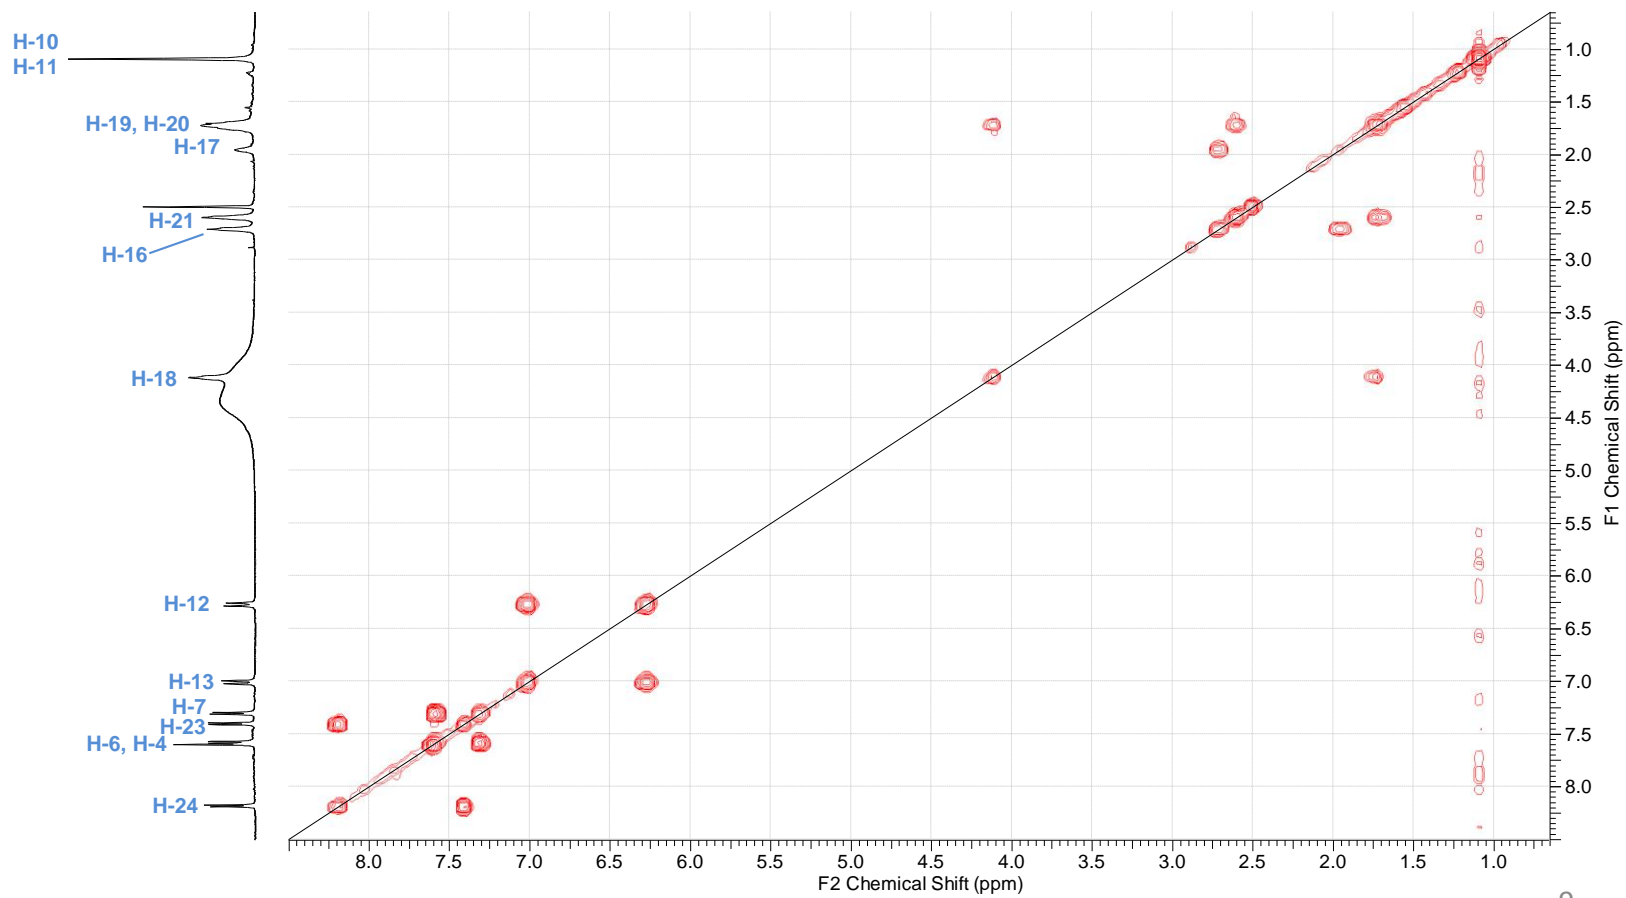

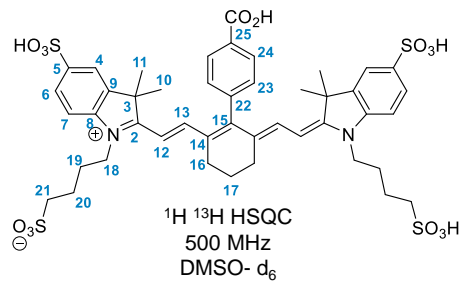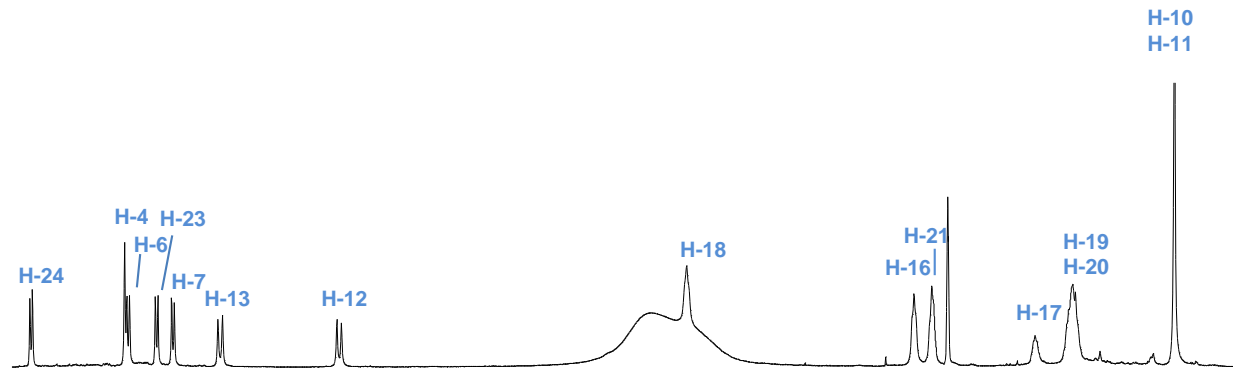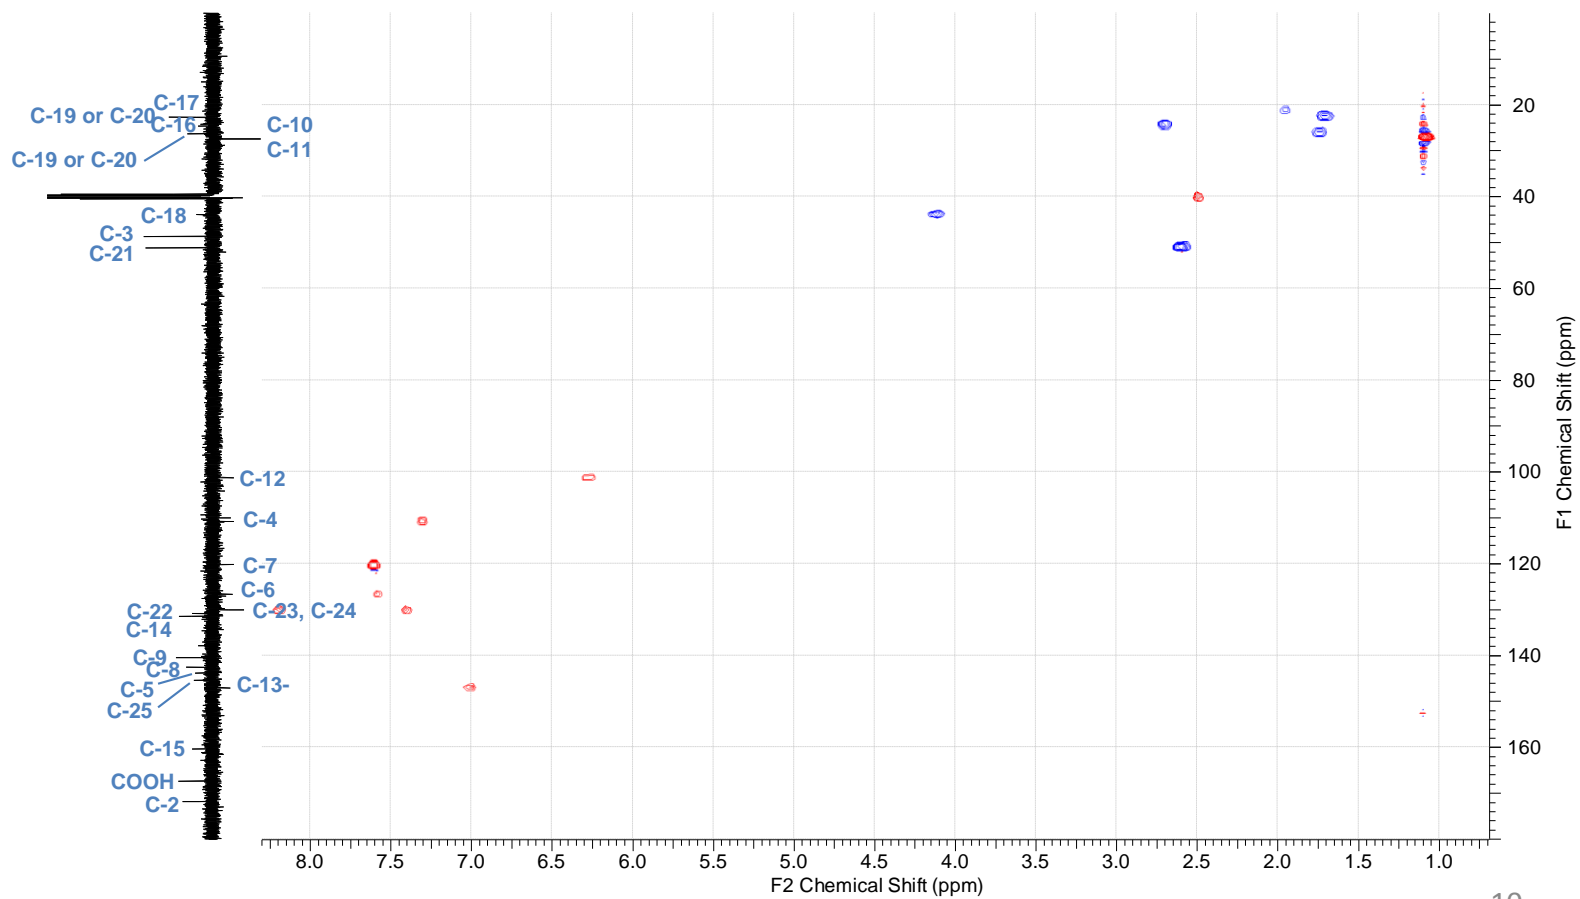

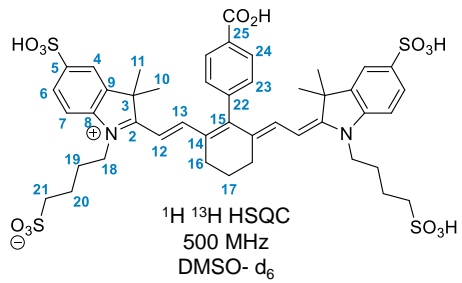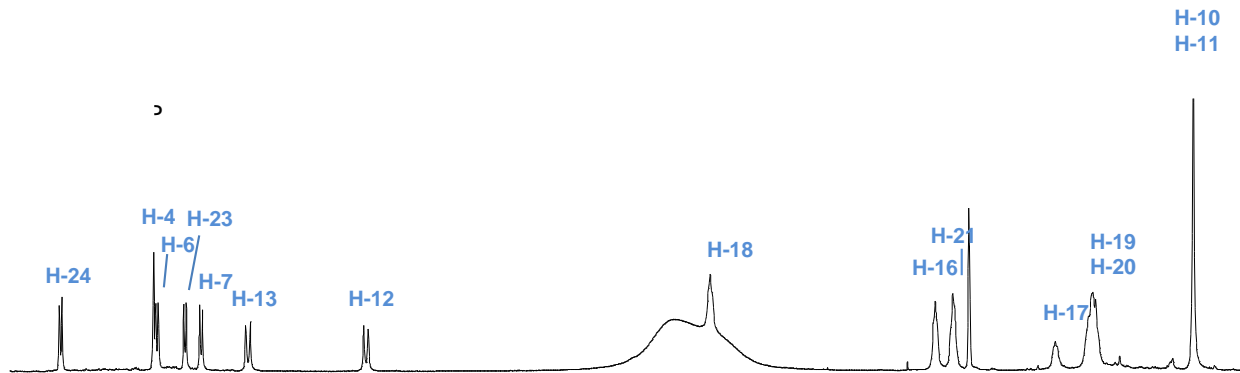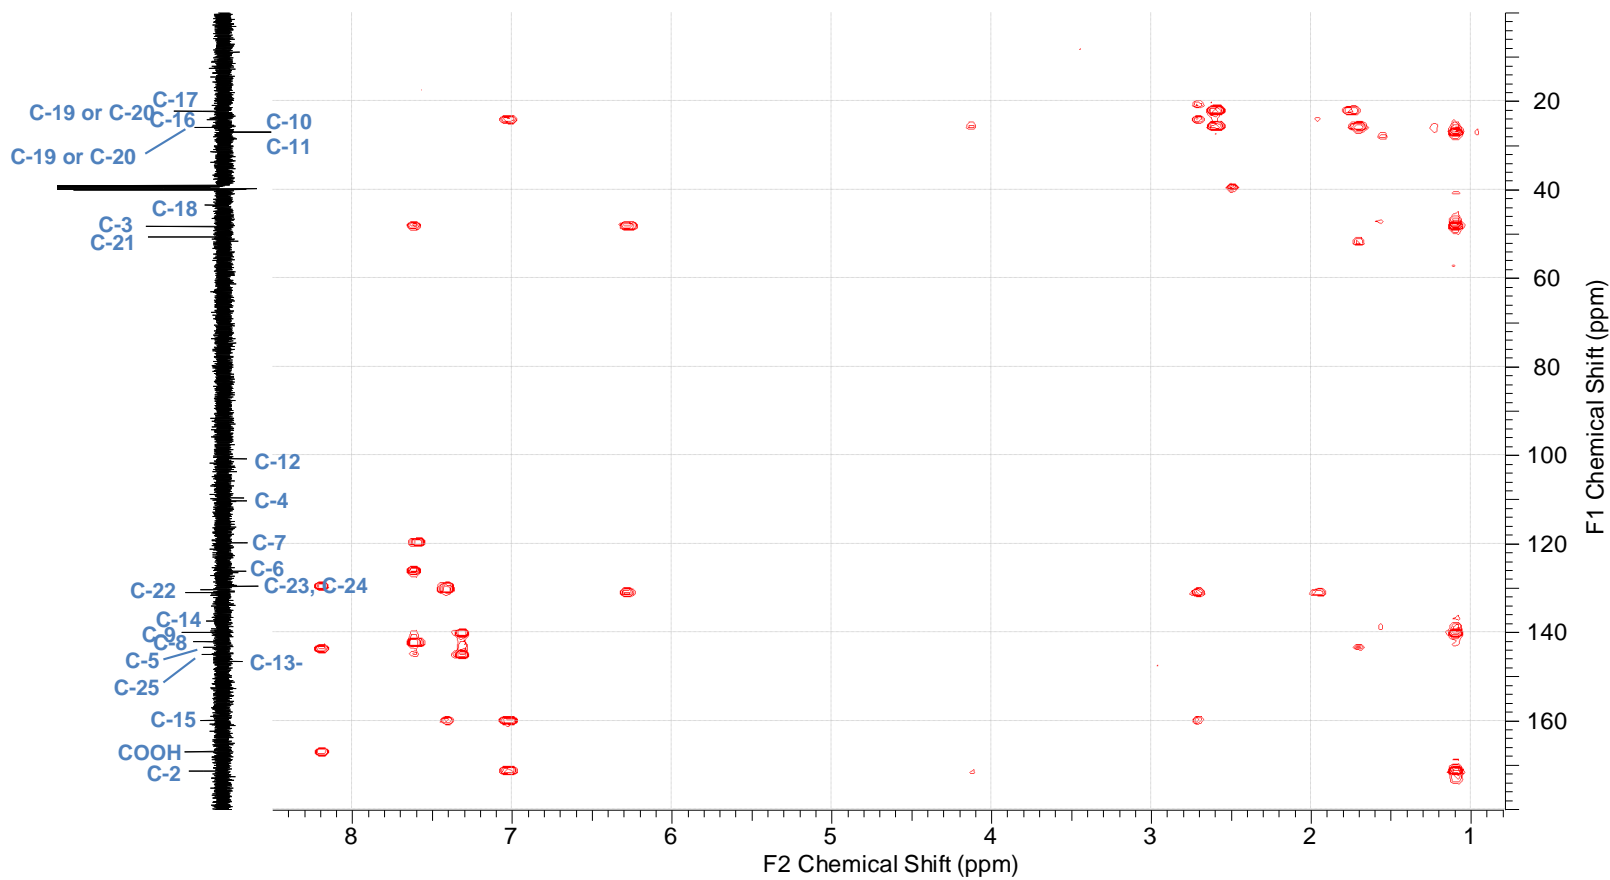

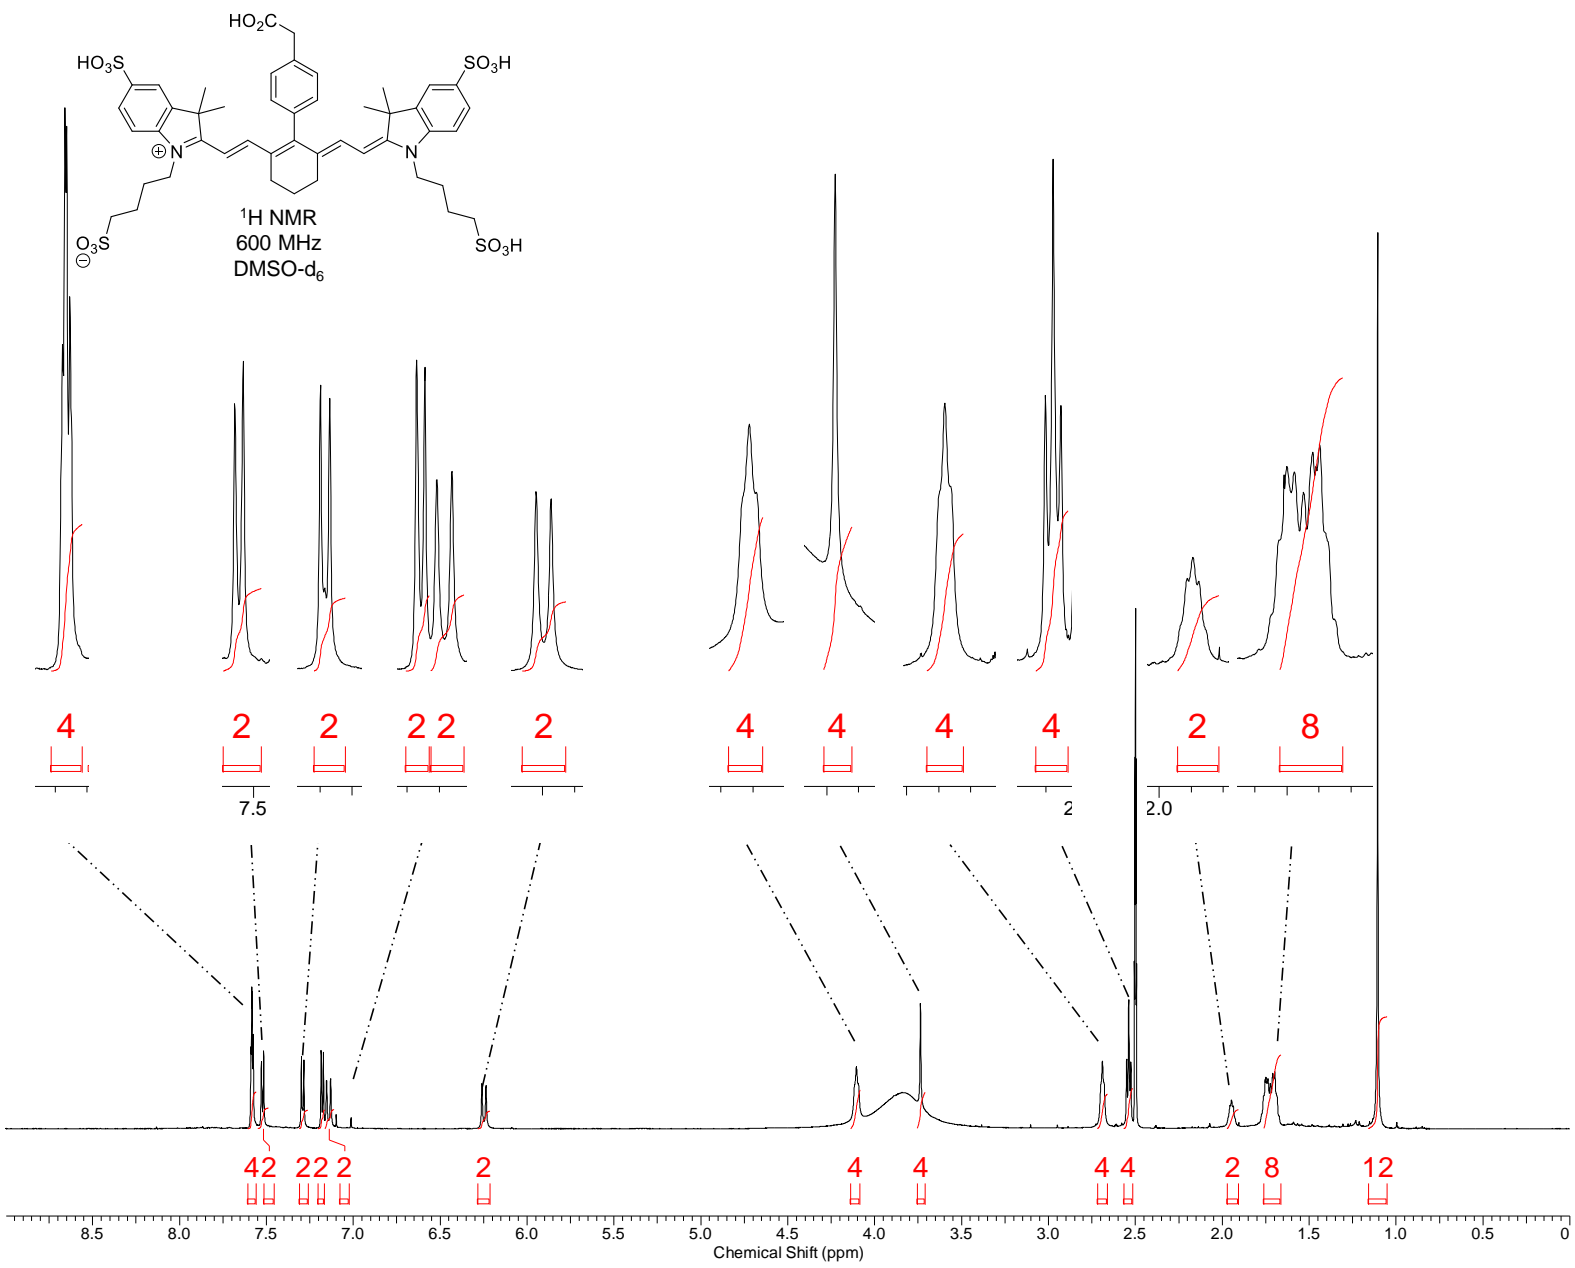

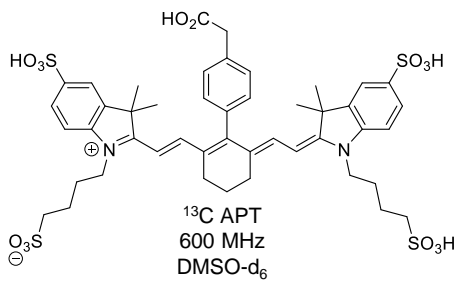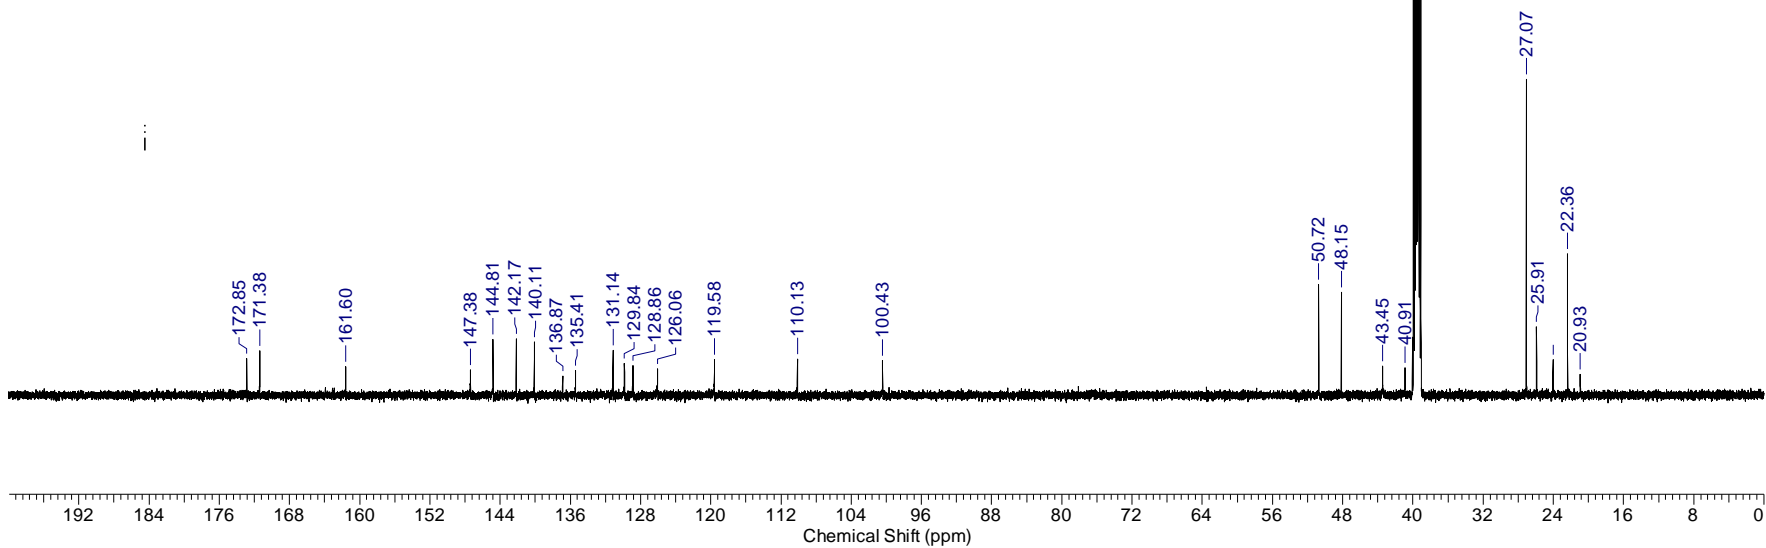

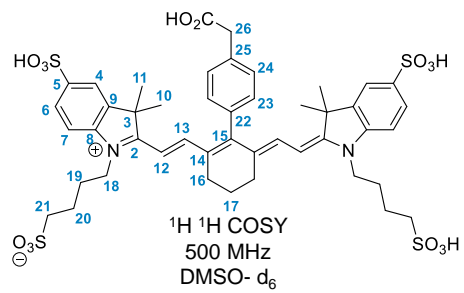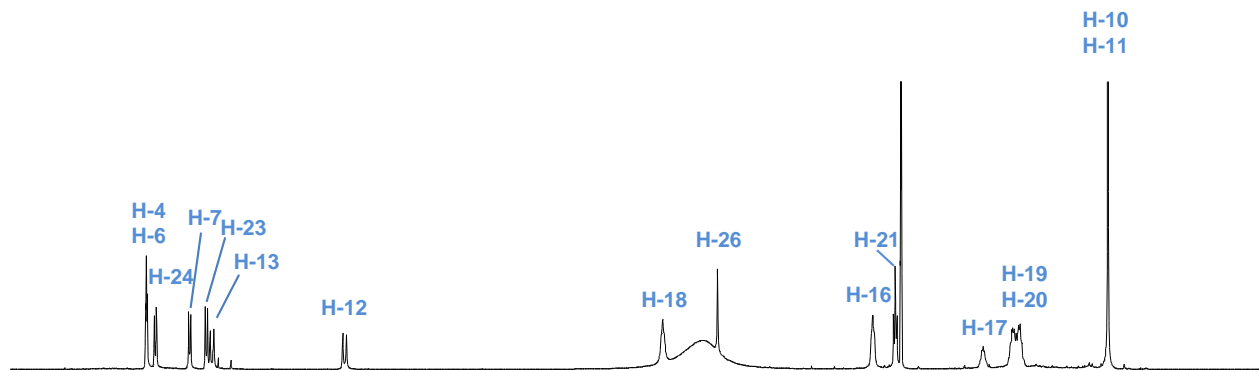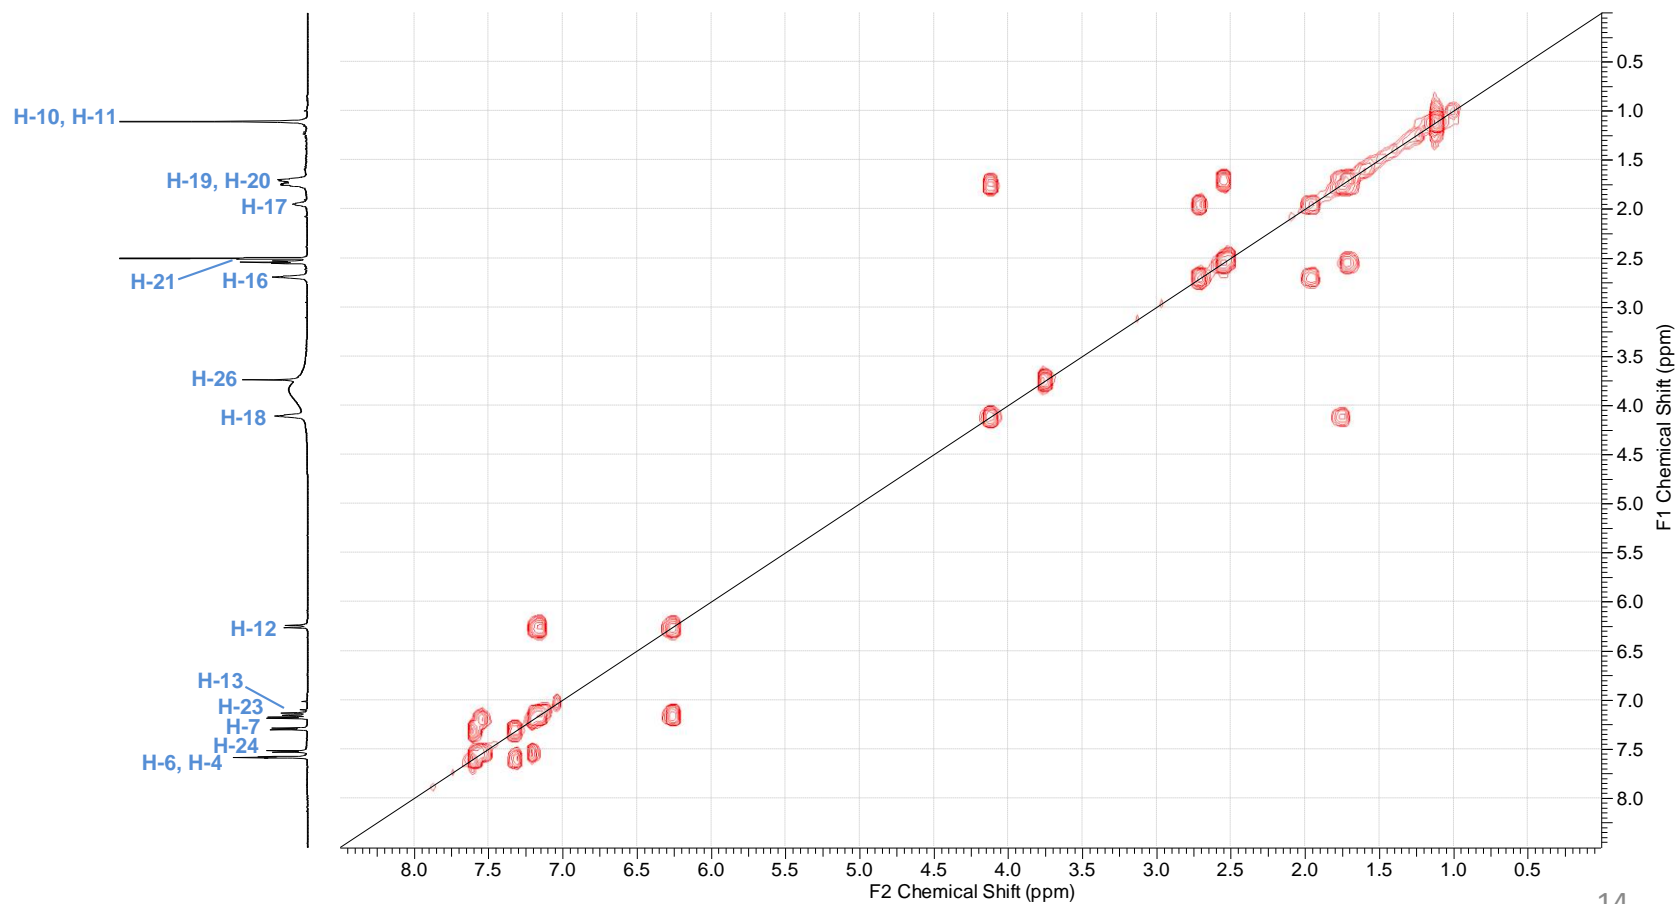

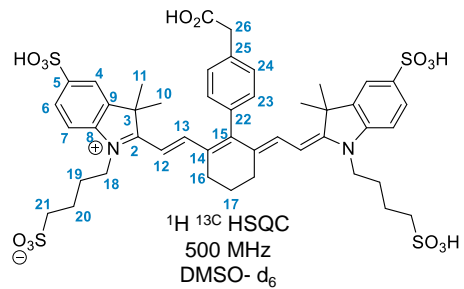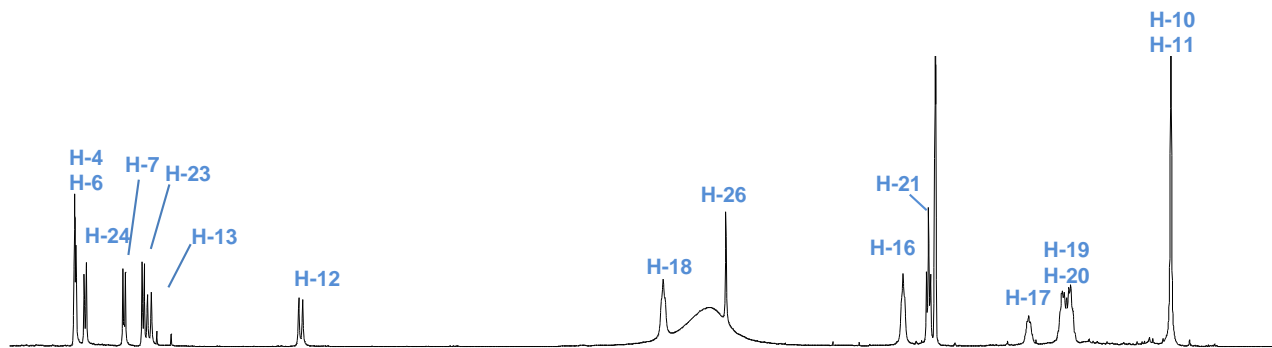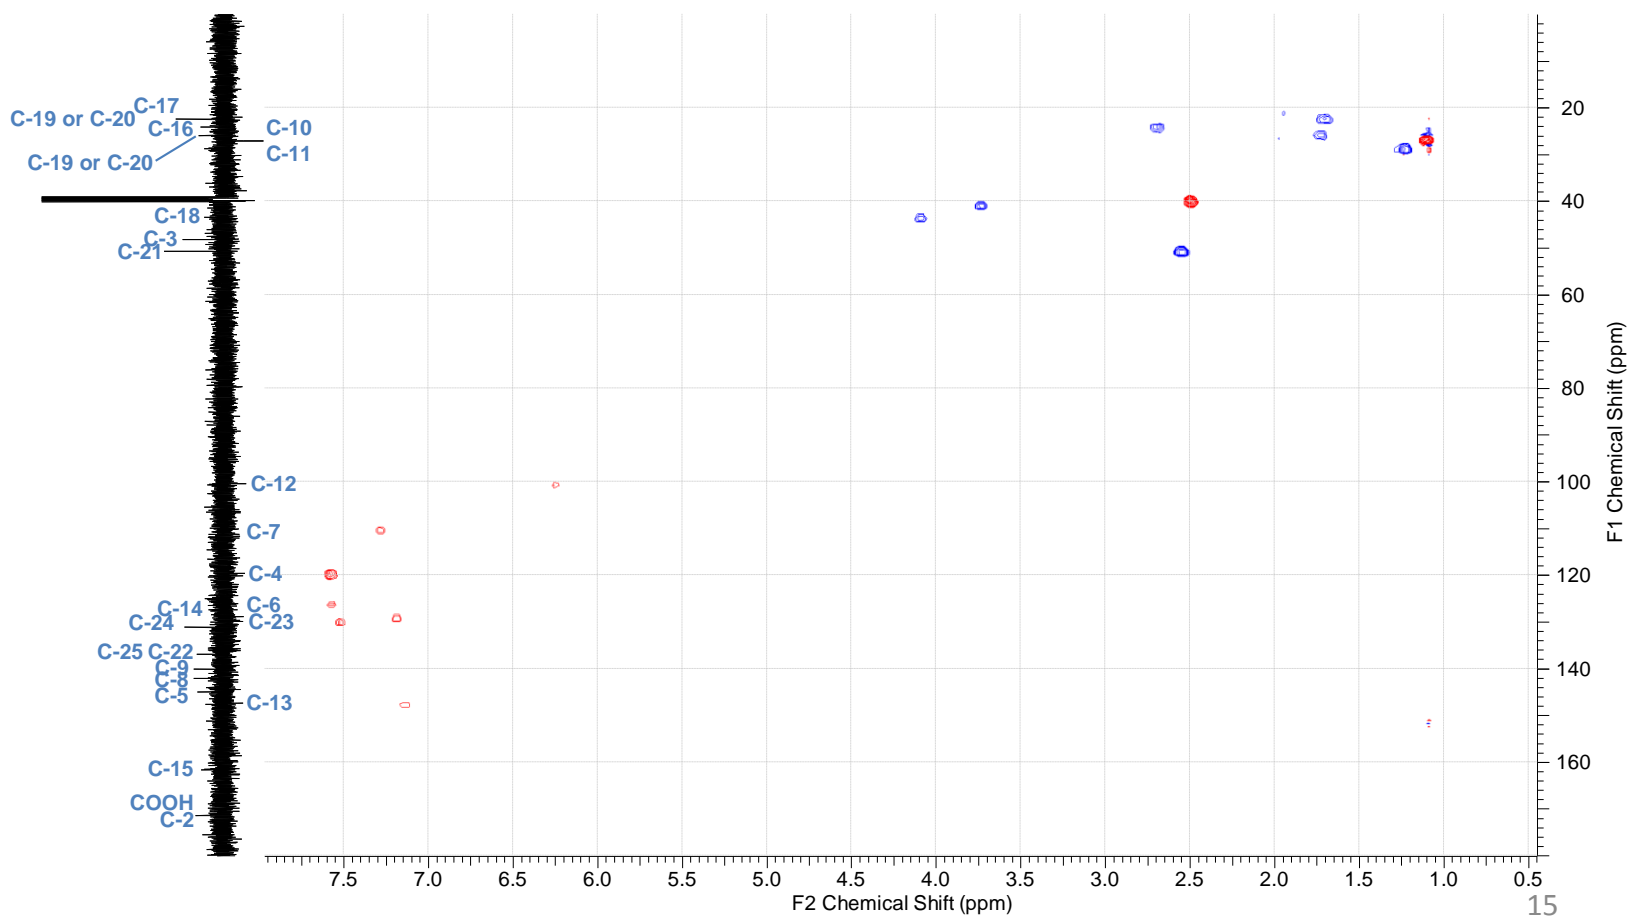

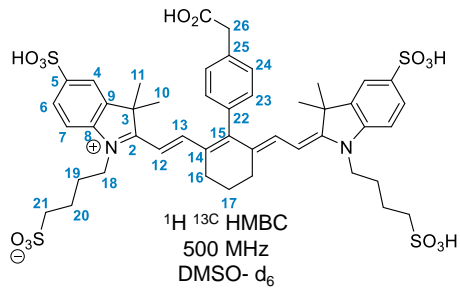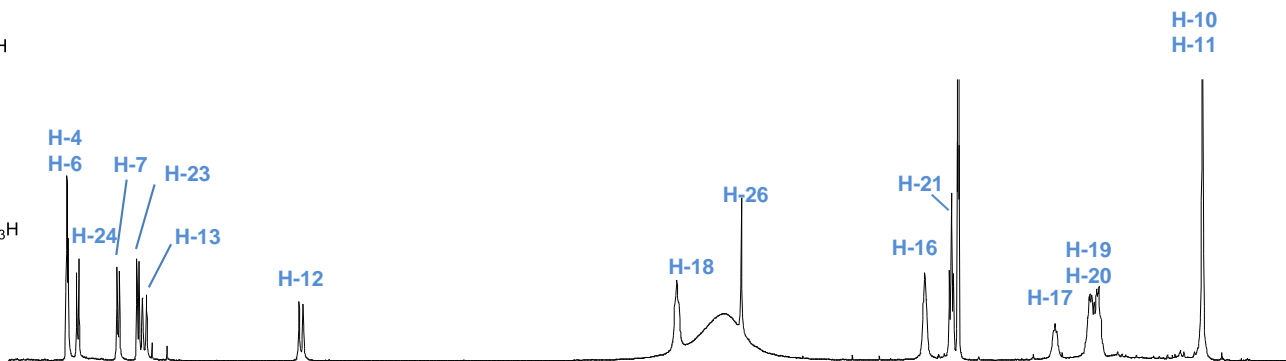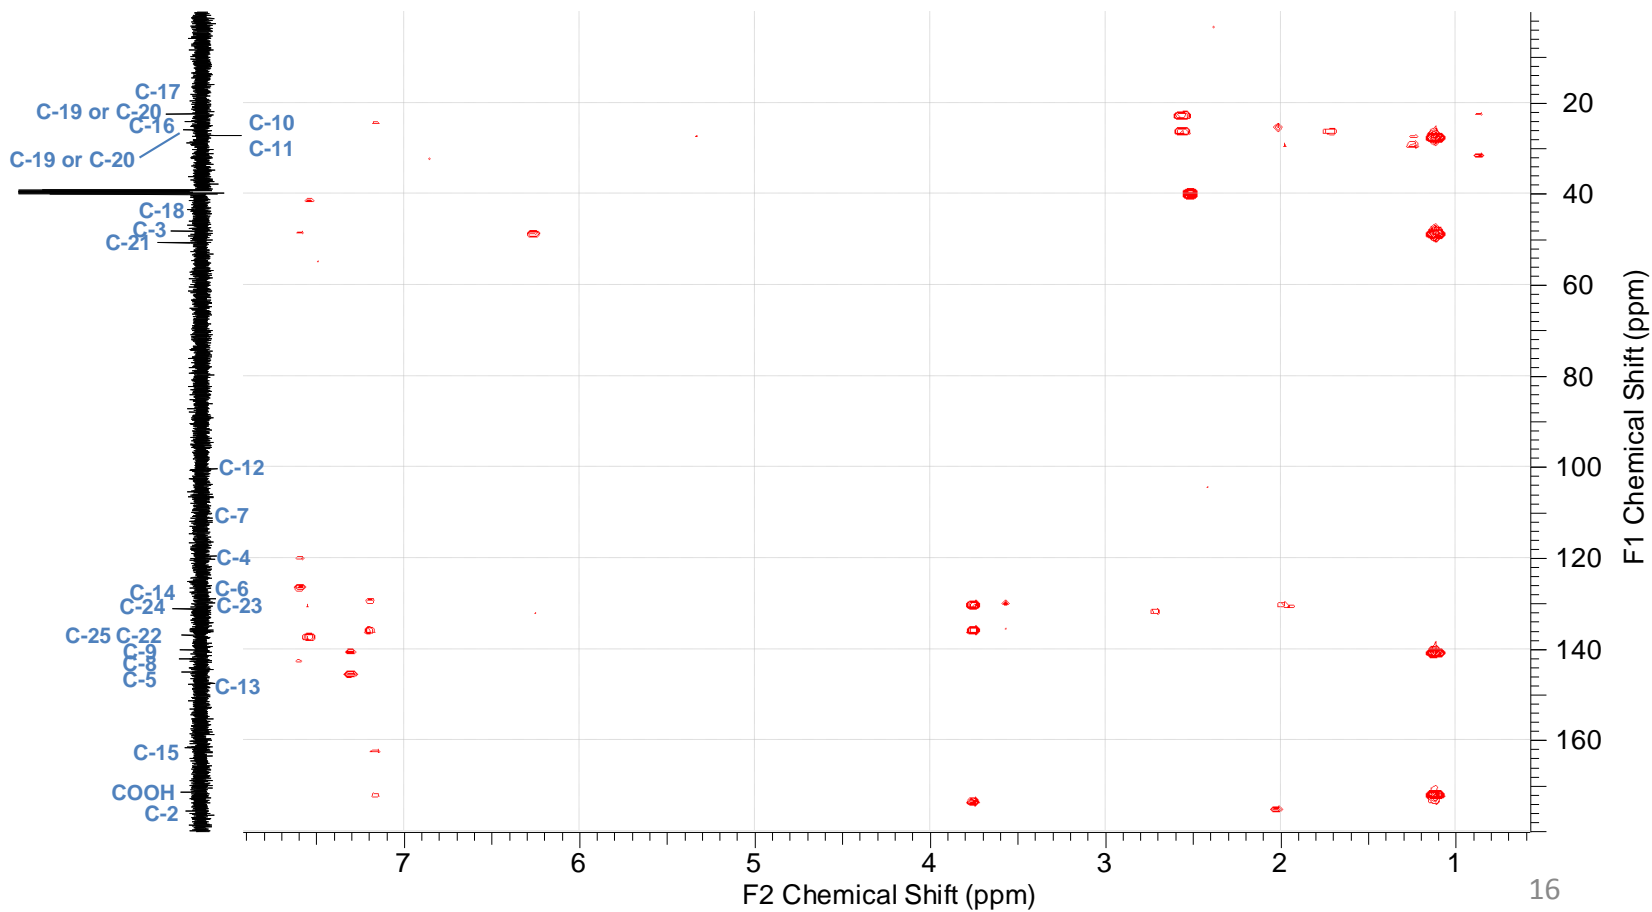



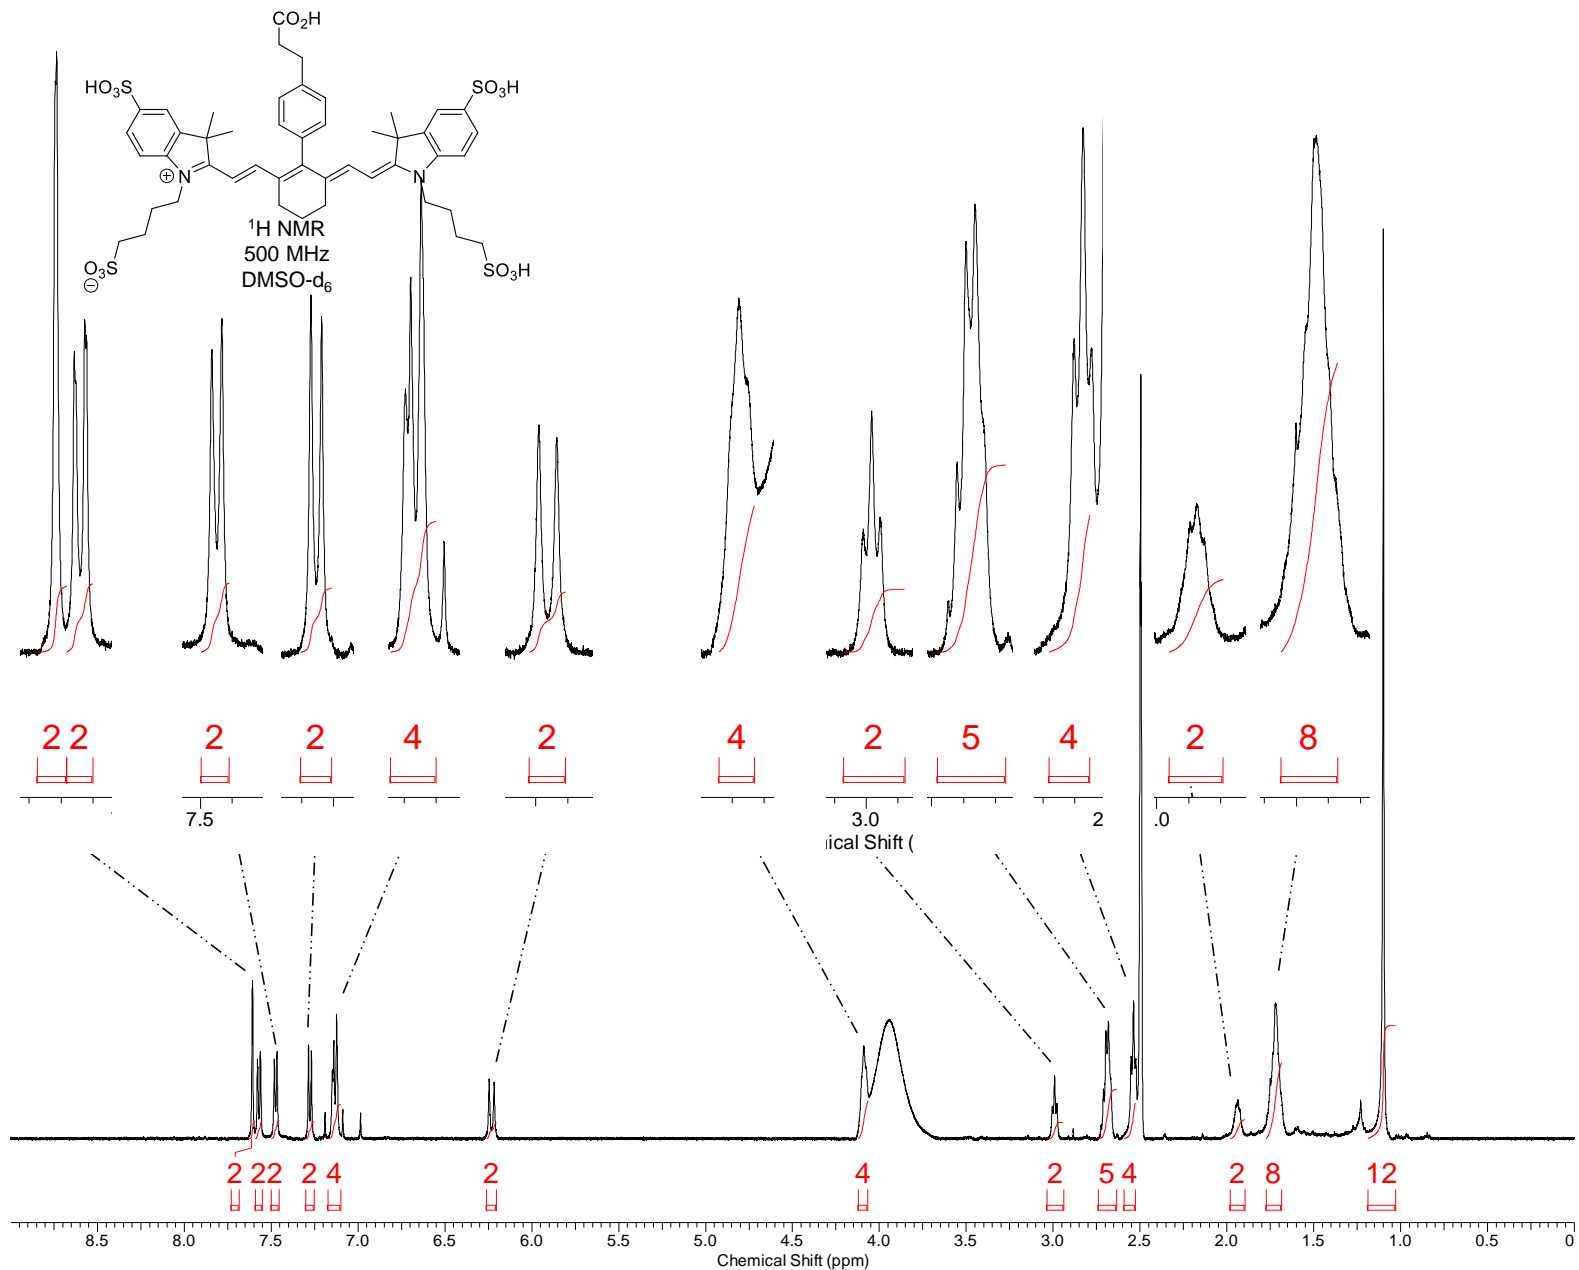

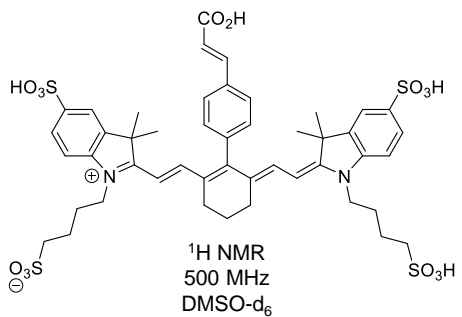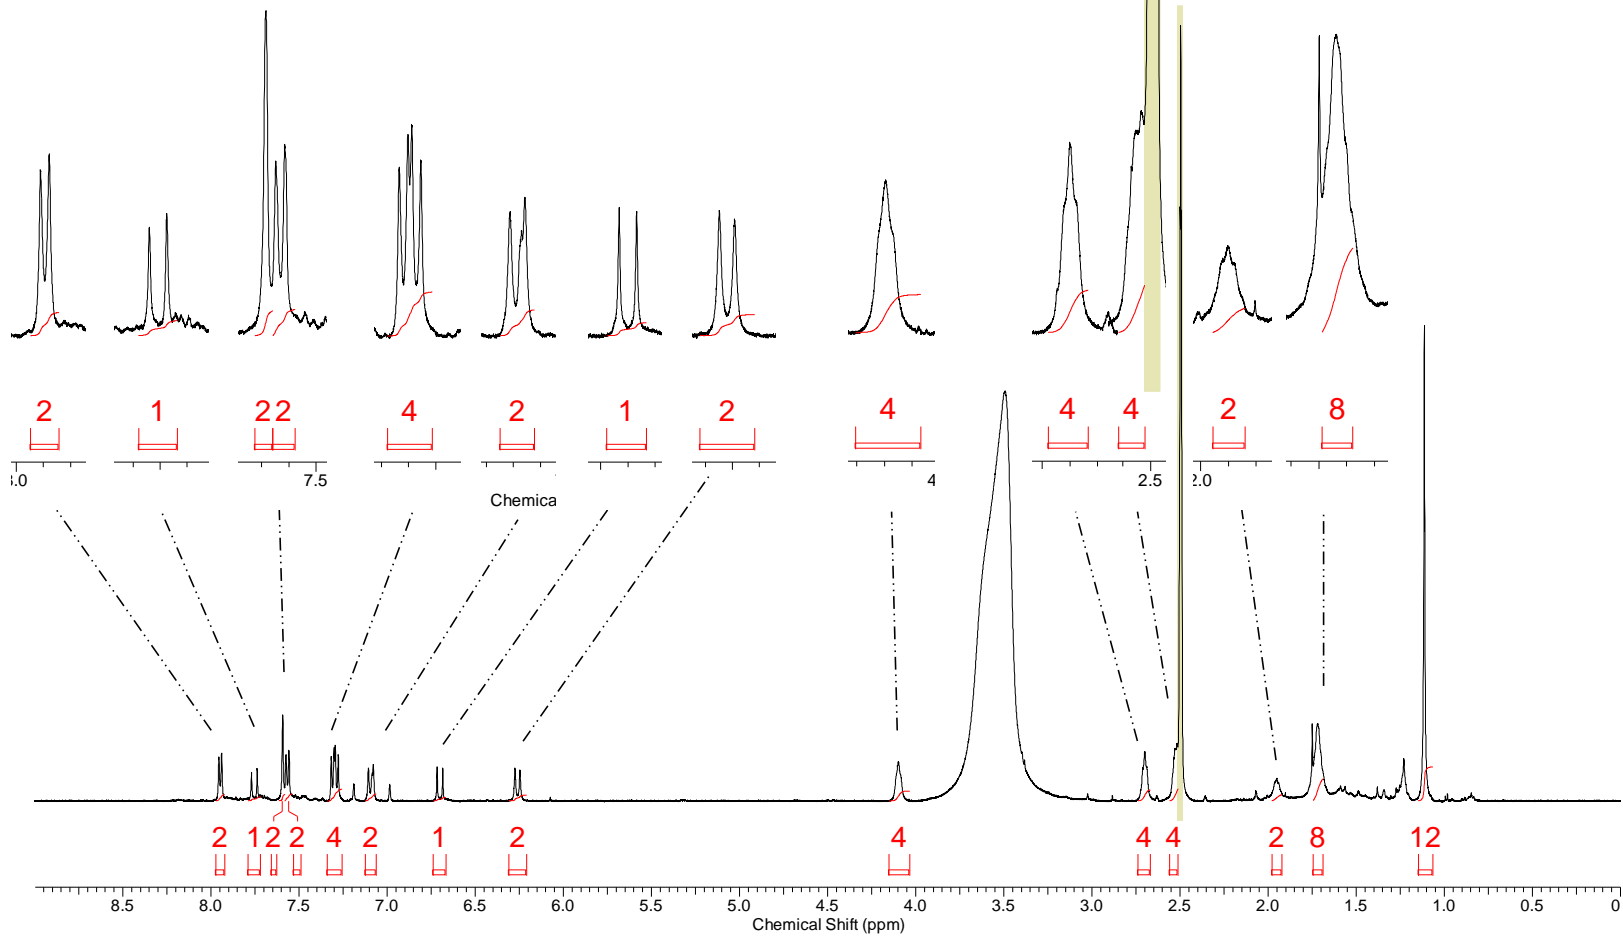

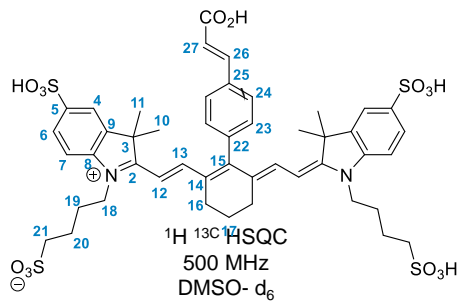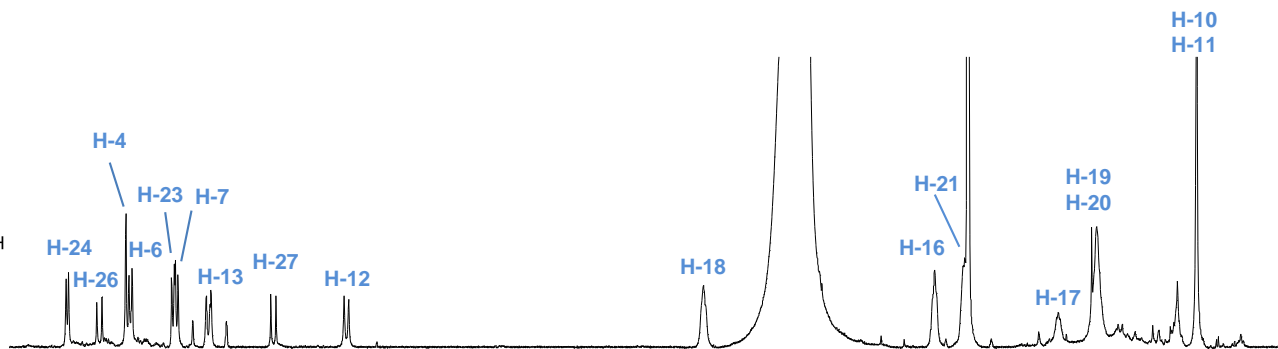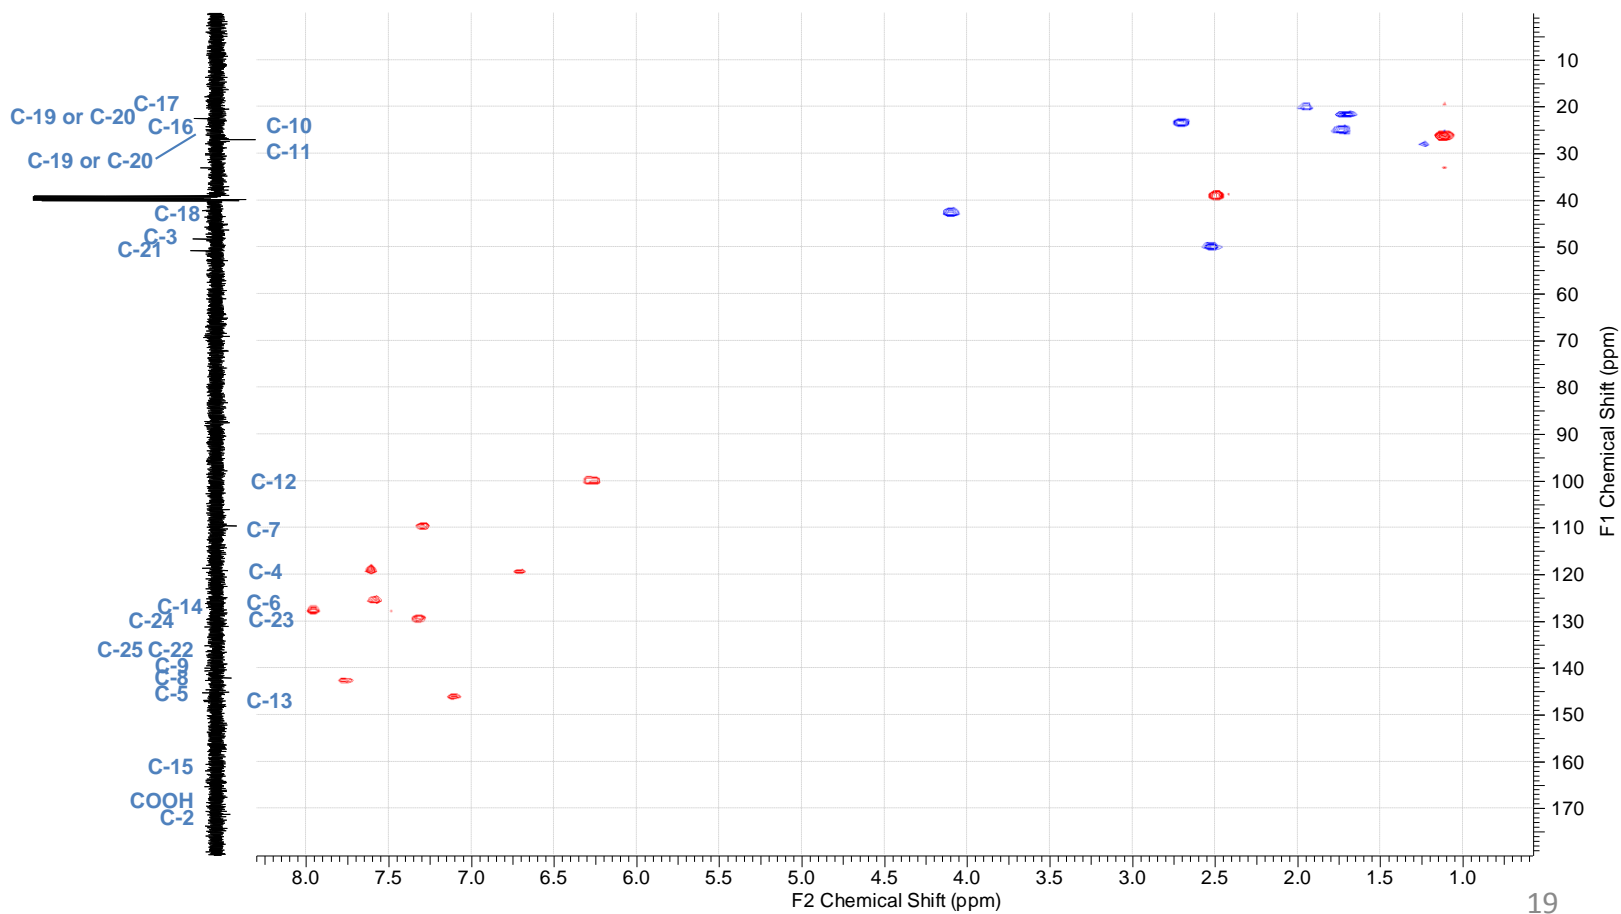

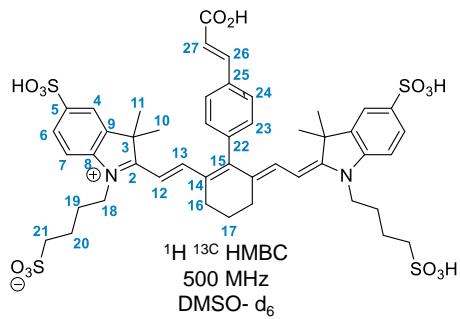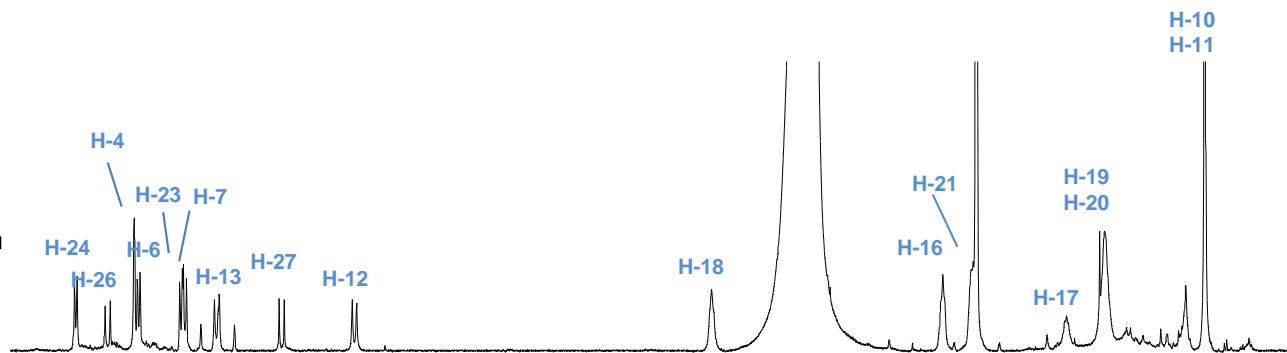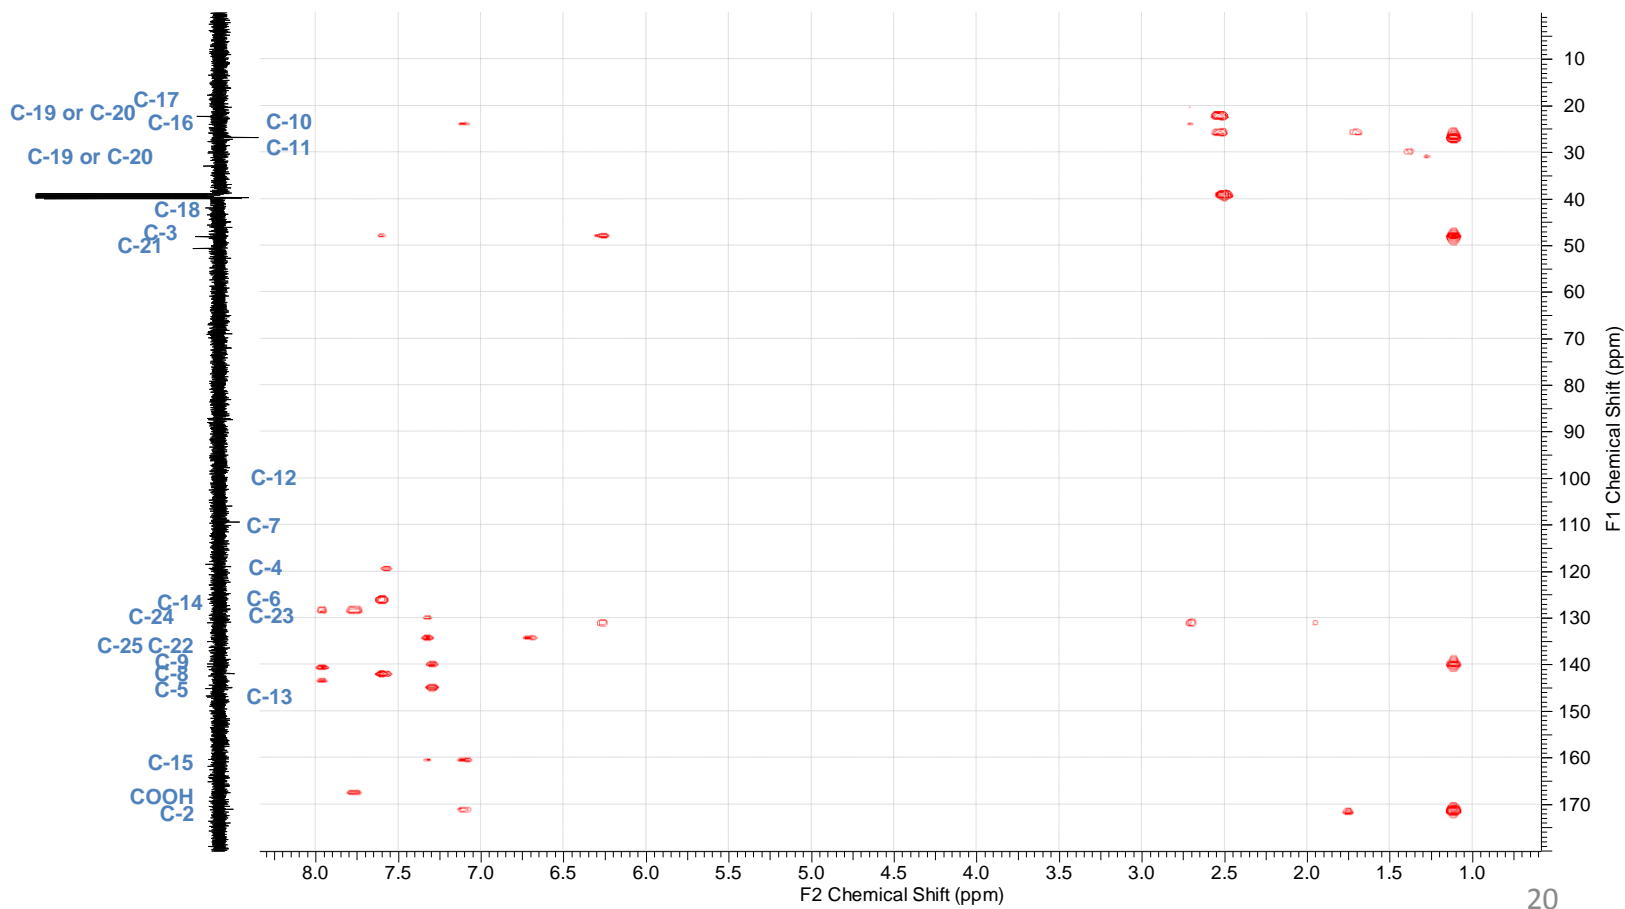

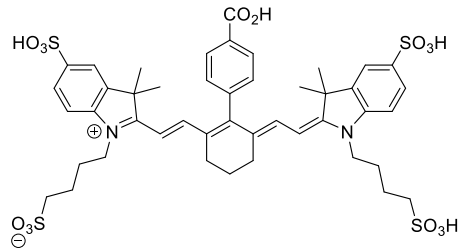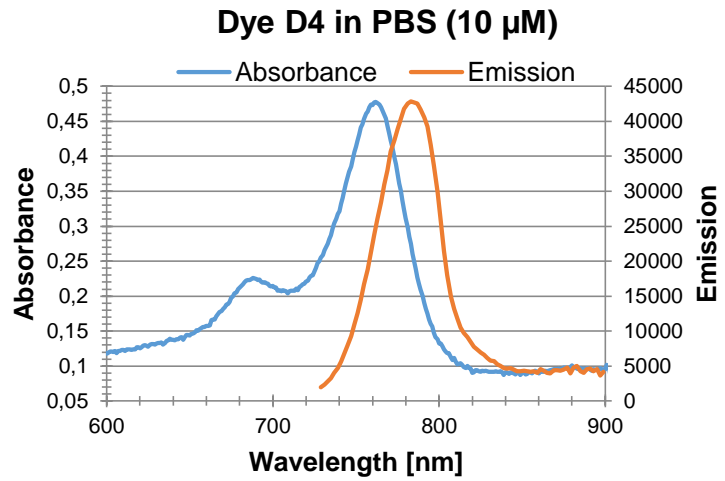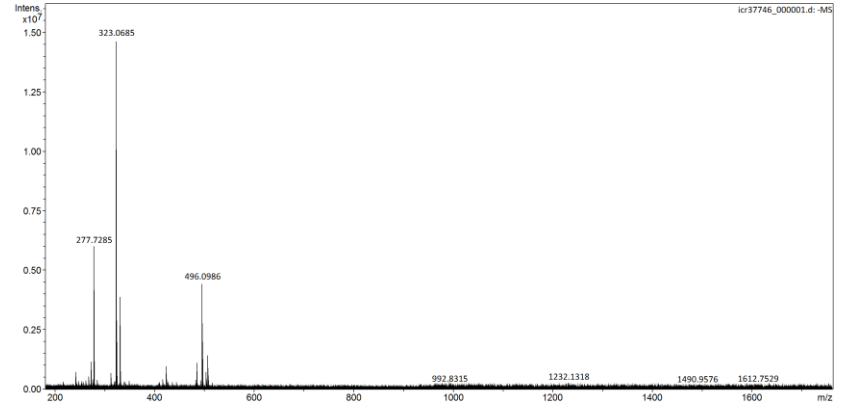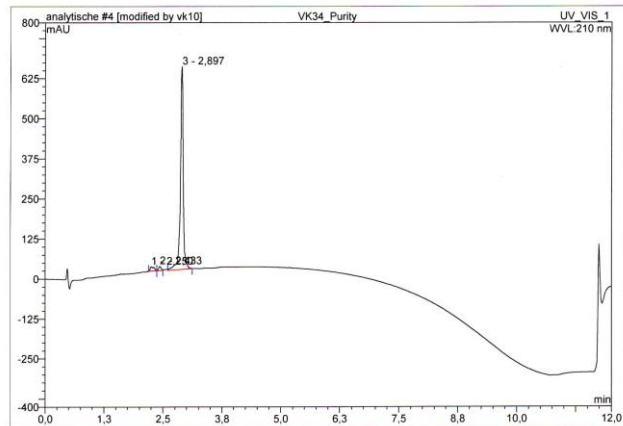

| No.           | Ret.Time min | Peak Name | Height mAU     | Area mAU*min  | Rel.Area %    | Amount       | Type |
|---------------|--------------|-----------|----------------|---------------|---------------|--------------|------|
| 1             | 2.25         | n.a.      | 12,753         | 1,198         | 2,61          | n.a.         | BM*  |
| 2             | 2.43         | n.a.      | 12,755         | 0,770         | 1,68          | n.a.         | M*   |
| 3             | 2.90         | n.a.      | 631,986        | 43,942        | 95,71         | n.a.         | MB*  |
| <b>Total:</b> |              |           | <b>657,494</b> | <b>45,910</b> | <b>100,00</b> | <b>0,000</b> |      |

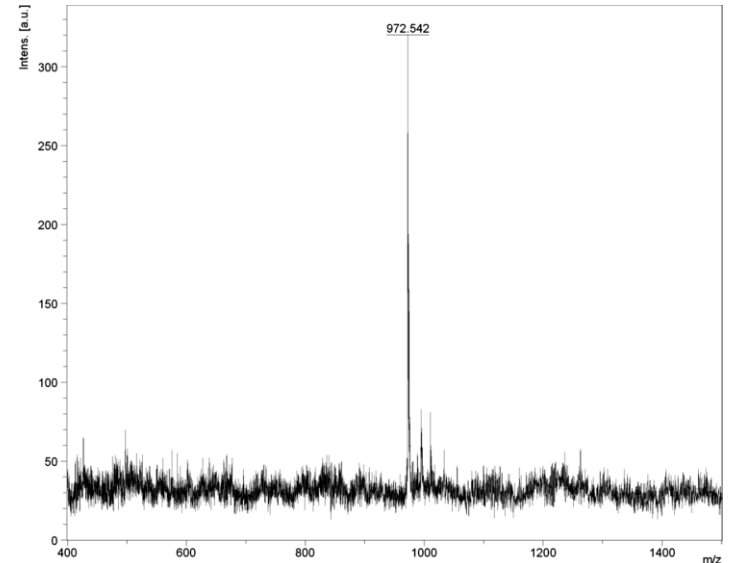

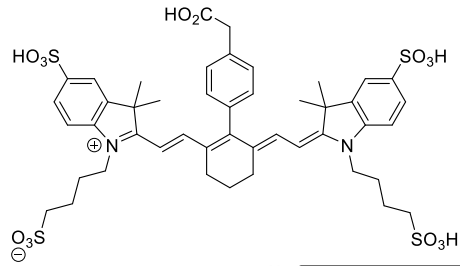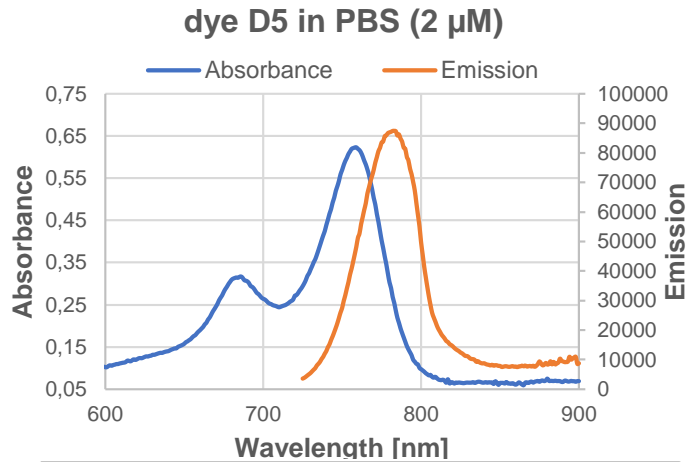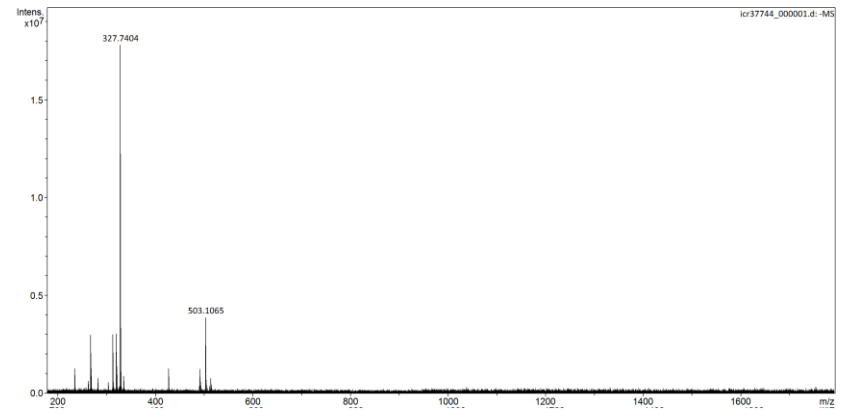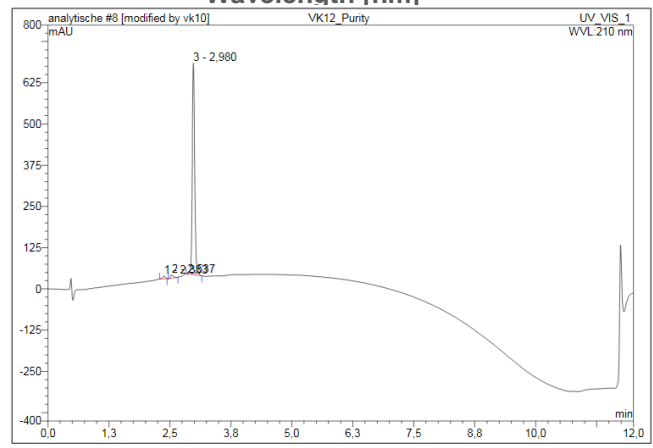

| No.           | Ret. Time min | Peak Name | Height mAU | Area mAU*min | Rel. Area % | Amount | Type |
|---------------|---------------|-----------|------------|--------------|-------------|--------|------|
| 1             | 2,38          | n.a.      | 8,669      | 0,509        | 1,33        | n.a.   | BMB* |
| 2             | 2,54          | n.a.      | 10,169     | 0,617        | 1,61        | n.a.   | BMB* |
| 3             | 2,98          | n.a.      | 641,207    | 37,126       | 97,06       | n.a.   | BMB* |
| <b>Total:</b> |               |           | 660,045    | 38,252       | 100,00      | 0,000  |      |

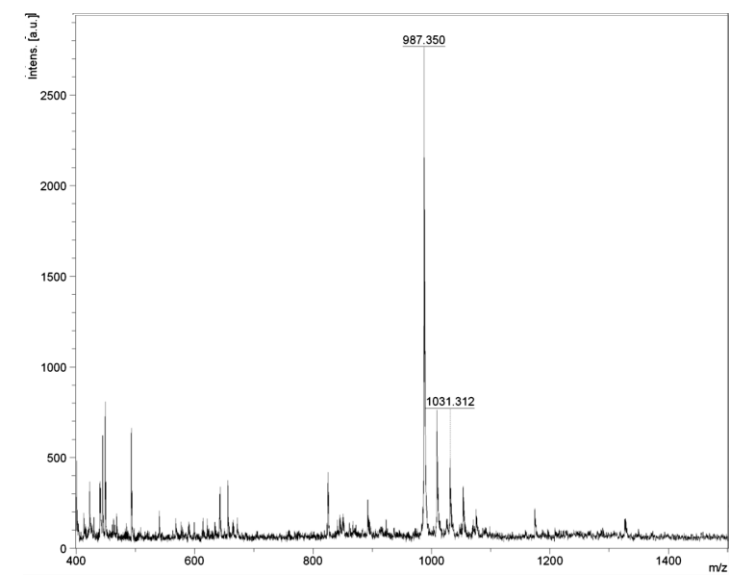

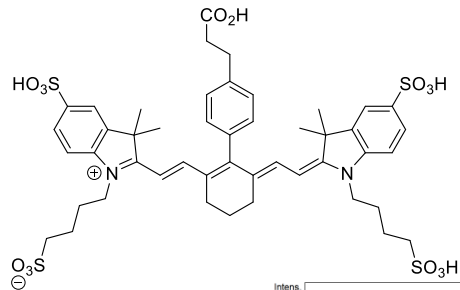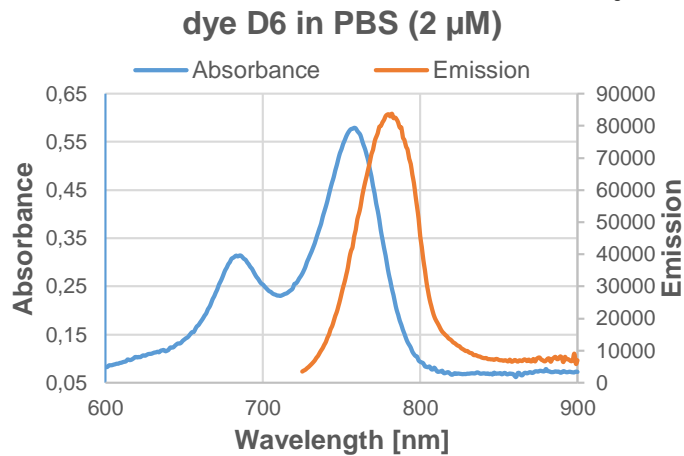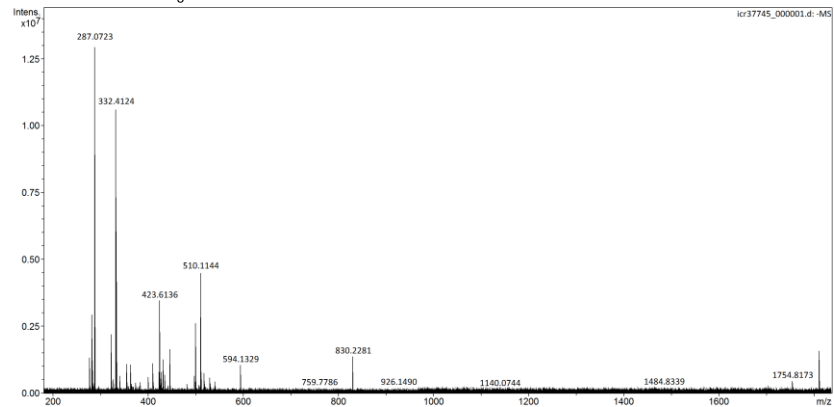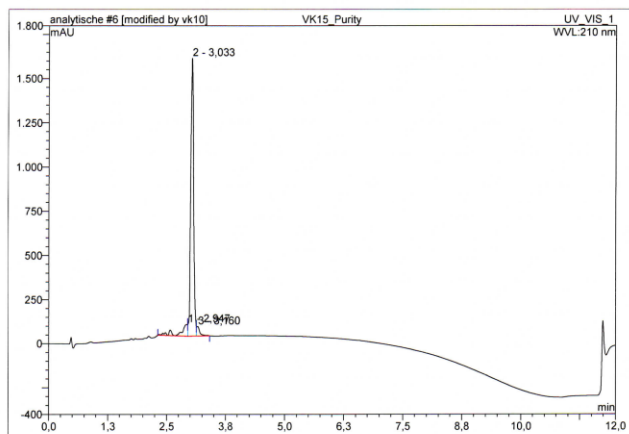

| No.           | Ret.Time min | Peak Name | Height mAU      | Area mAU*min   | Rel.Area %    | Amount       | Type |
|---------------|--------------|-----------|-----------------|----------------|---------------|--------------|------|
| 1             | 2,95         | n.a       | 66,511          | 10,826         | 8,43          | n.a          | BM * |
| 2             | 3,03         | n.a       | 1571,761        | 113,399        | 88,30         | n.a          | M *  |
| 3             | 3,16         | n.a       | 53,412          | 4,199          | 3,27          | n.a          | MB*  |
| <b>Total:</b> |              |           | <b>1691,684</b> | <b>128,424</b> | <b>100,00</b> | <b>0,000</b> |      |

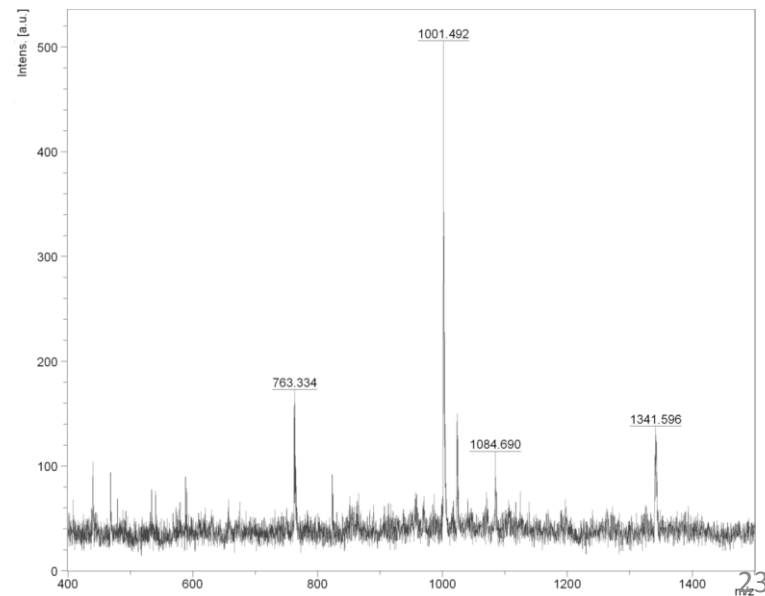

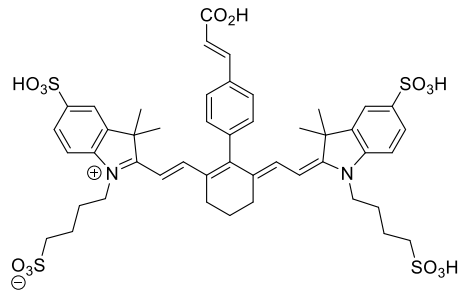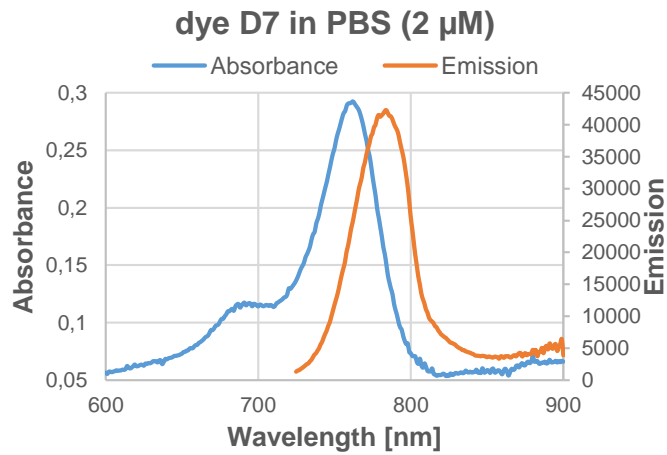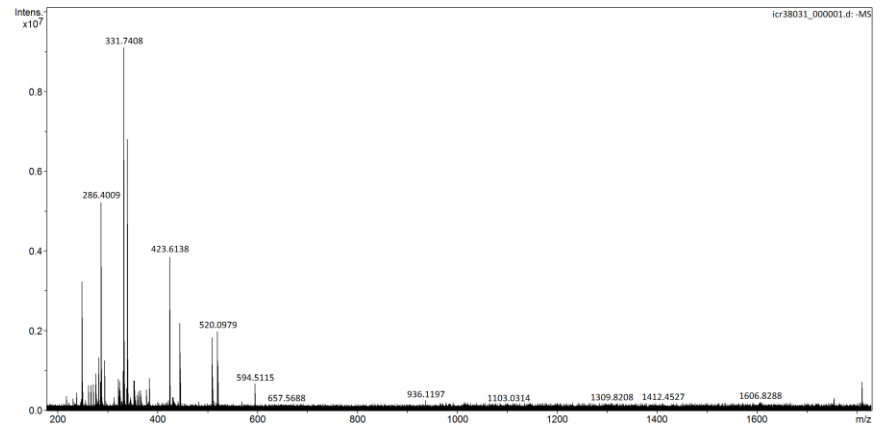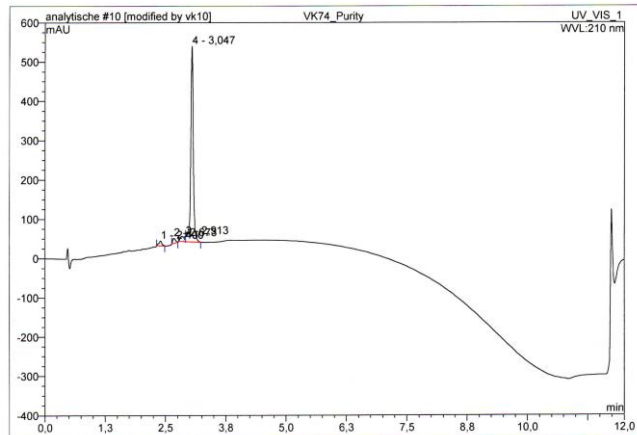

| No.           | Ret.Time<br>min | Peak Name | Height<br>mAU | Area<br>mAU*min | Rel.Area<br>% | Amount | Type |
|---------------|-----------------|-----------|---------------|-----------------|---------------|--------|------|
| 1             | 2.40            | n.a.      | 11,766        | 0,834           | 2,49          | n.a.   | BMB* |
| 2             | 2.67            | n.a.      | 12,096        | 0,777           | 2,32          | n.a.   | BMB* |
| 3             | 2.91            | n.a.      | 13,349        | 1,380           | 4,12          | n.a.   | BM * |
| 4             | 3.05            | n.a.      | 497,864       | 30,523          | 91,08         | n.a.   | MB*  |
| <b>Total:</b> |                 |           | 535,075       | 33,513          | 100,00        | 0,000  |      |

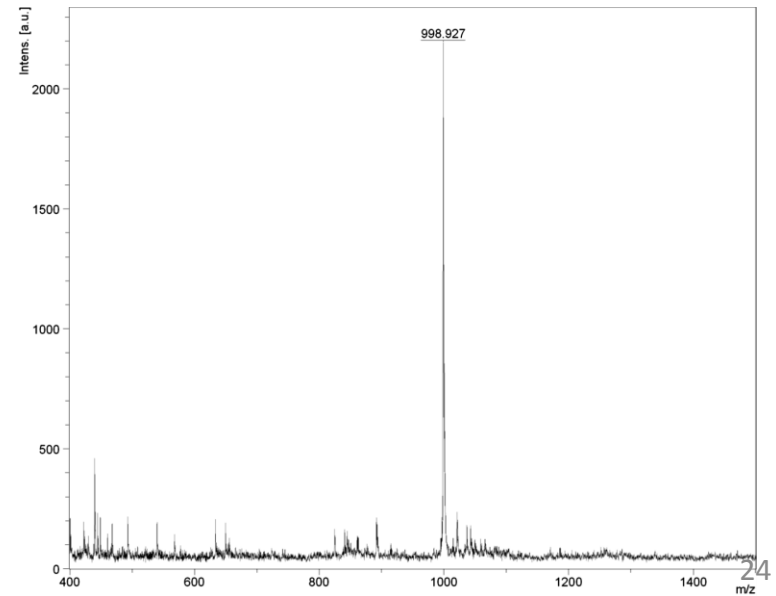



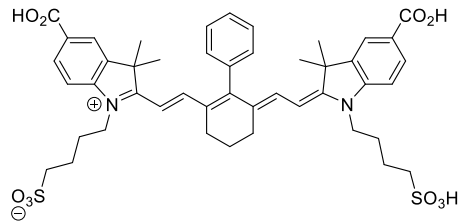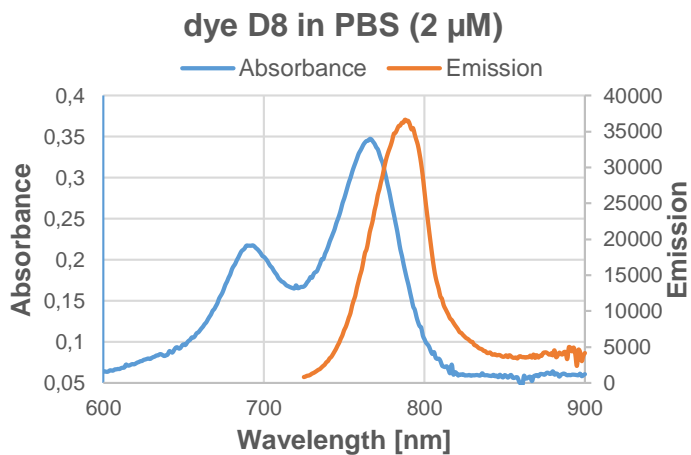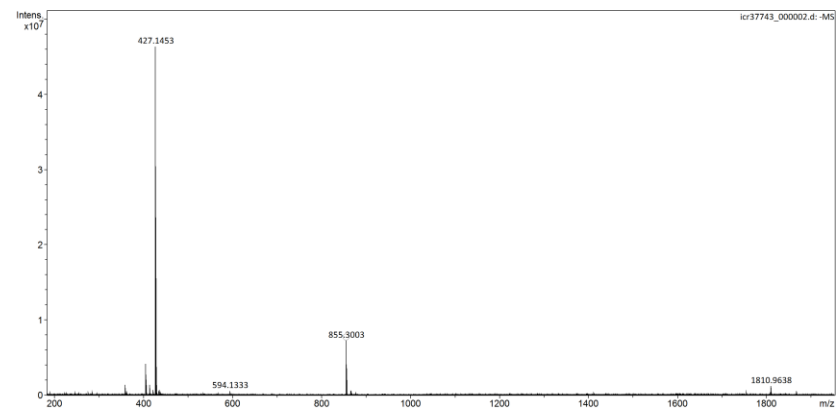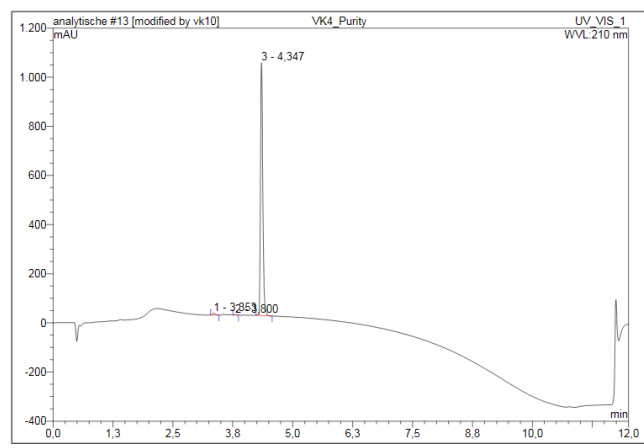

| No.           | Ret.Time min | Peak Name | Height mAU | Area mAU*min | Rel.Area % | Amount | Type |
|---------------|--------------|-----------|------------|--------------|------------|--------|------|
| 1             | 3.35         | n.a.      | 7.554      | 0.437        | 0.75       | n.a.   | BMB* |
| 2             | 3.80         | n.a.      | 1.530      | 0.069        | 0.12       | n.a.   | BMB* |
| 3             | 4.35         | n.a.      | 1028.743   | 57.367       | 99.13      | n.a.   | BMB* |
| <b>Total:</b> |              |           | 1037.828   | 57.873       | 100.00     | 0.000  |      |

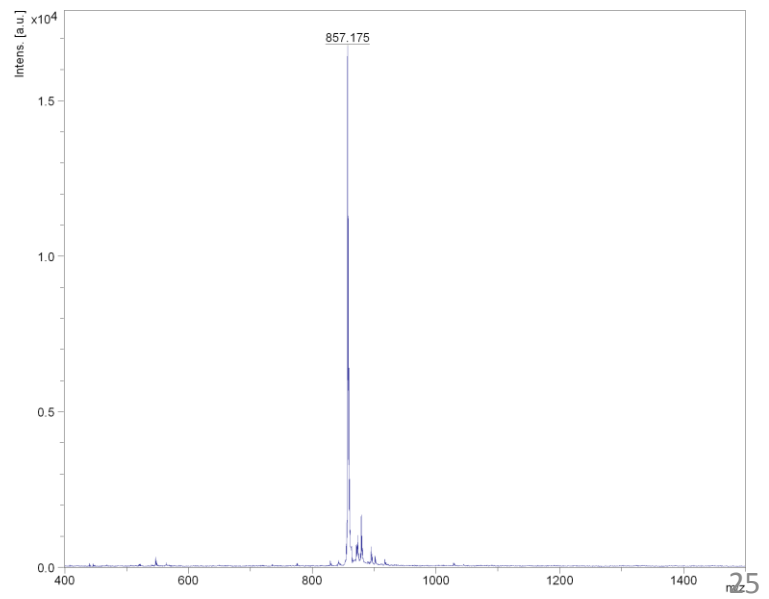

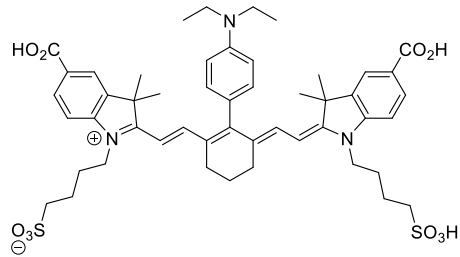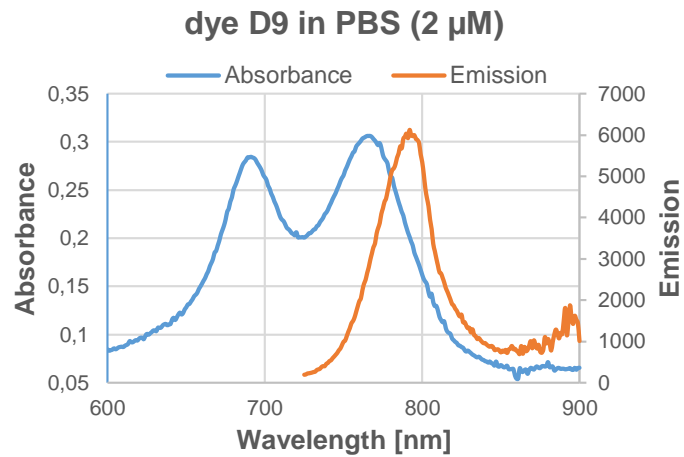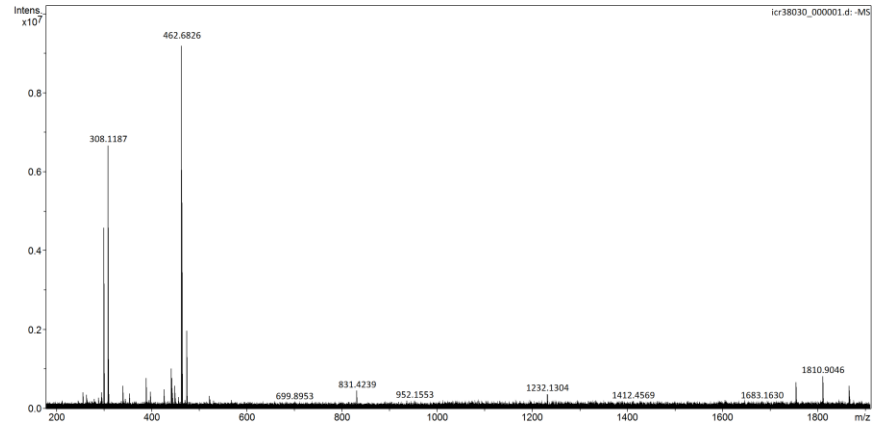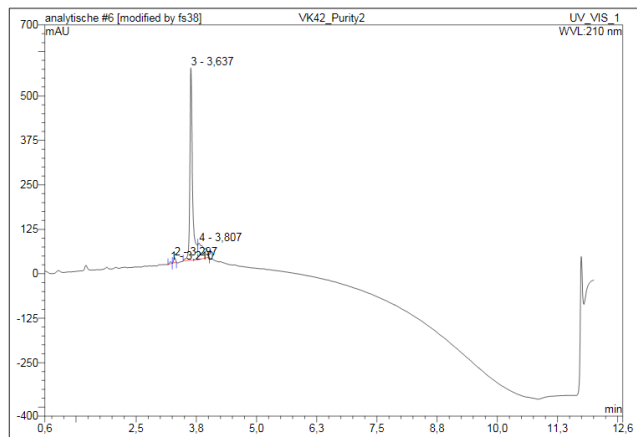

| No.           | Ret.Time min | Peak Name | Height mAU | Area mAU*min | Rel.Area % | Amount | Type |
|---------------|--------------|-----------|------------|--------------|------------|--------|------|
| 1             | 3.21         | n.a.      | 6,034      | 0,261        | 0,61       | n.a.   | BMB* |
| 2             | 3,30         | n.a.      | 13,941     | 0,586        | 1,37       | n.a.   | BMB* |
| 3             | 3,64         | n.a.      | 540,793    | 34,680       | 81,32      | n.a.   | BM * |
| 4             | 3,81         | n.a.      | 45,500     | 7,118        | 16,69      | n.a.   | MB*  |
| <b>Total:</b> |              |           | 606,267    | 42,646       | 100,00     | 0,000  |      |

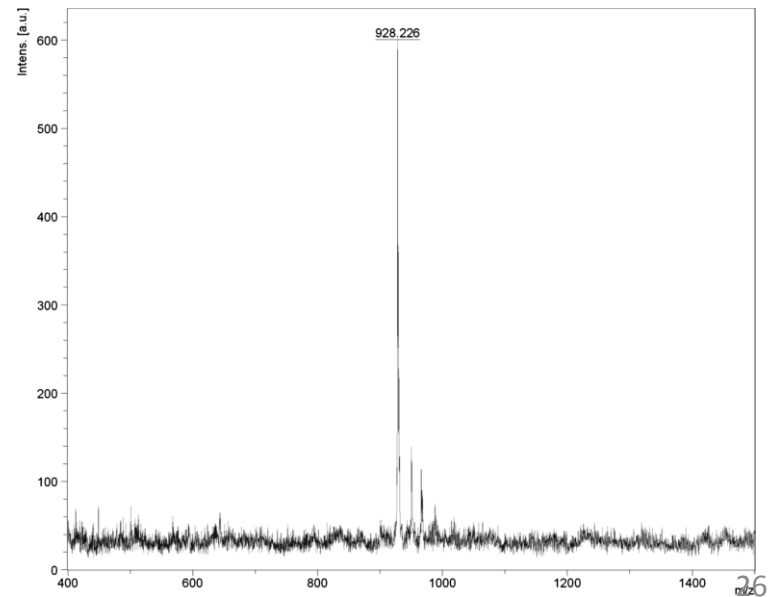

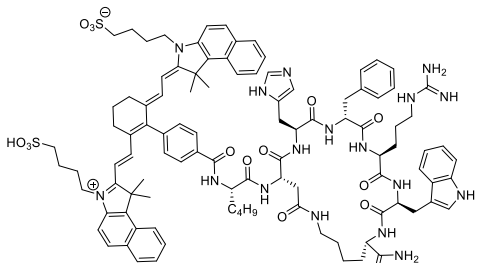

**probe P1 in DMSO (1 μM)**

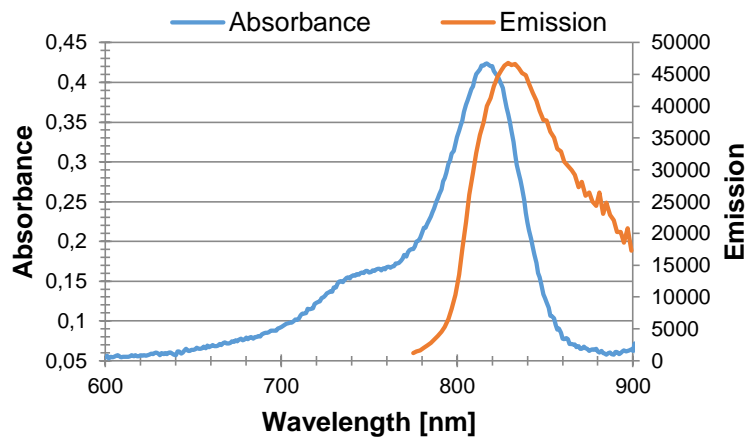

03-cwm-dk11 #54-270 RT: 0.53-2.43 AV: 27 NL: 2.86E5  
 F: FTMS + p ESI Full ms [200.00-2000.00]

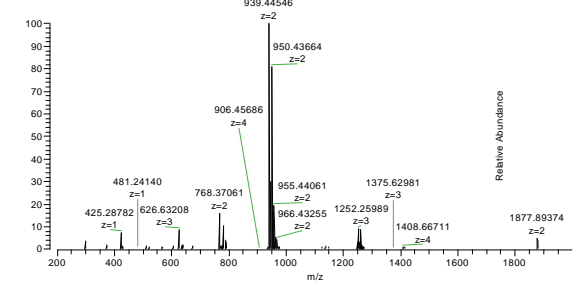

03-cwm-dk11 #54-270 RT: 0.53-2.43 AV: 27 NL: 2.86E5  
 F: FTMS + p ESI Full ms [200.00-2000.00]

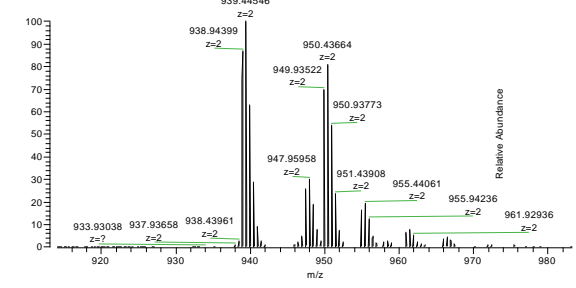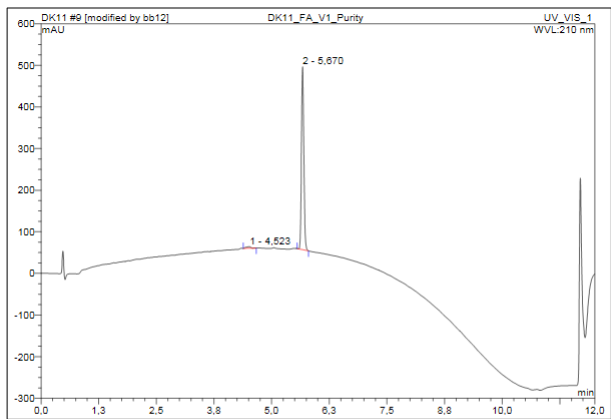

| No.           | Ret.Time min | Peak Name | Height mAU | Area mAU*min | Rel.Area % | Amount | Type             |
|---------------|--------------|-----------|------------|--------------|------------|--------|------------------|
| 1             | 4.52         | n.a.      | 3,608      | 0,458        | 1,70       | n.a.   | BMB <sup>+</sup> |
| 2             | 5,67         | n.a.      | 439,602    | 26,549       | 98,30      | n.a.   | BMB <sup>+</sup> |
| <b>Total:</b> |              |           | 443,210    | 27,008       | 100,00     | 0,000  |                  |

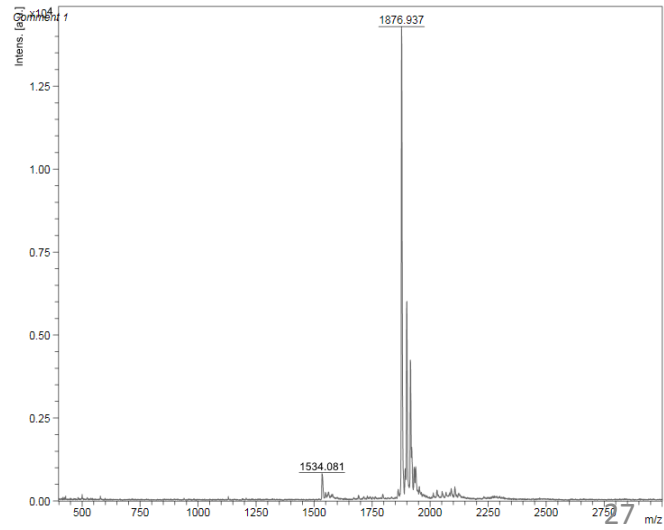

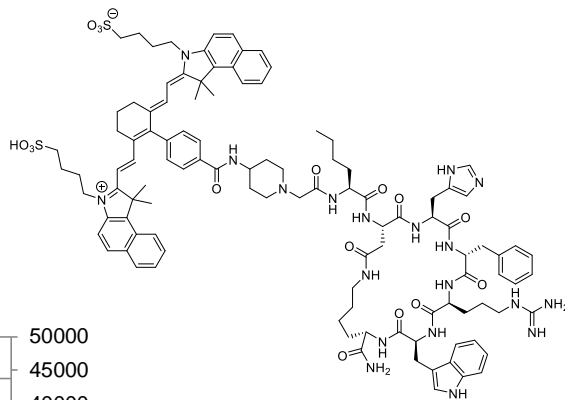

probe P2 in DMSO (1  $\mu$ M)

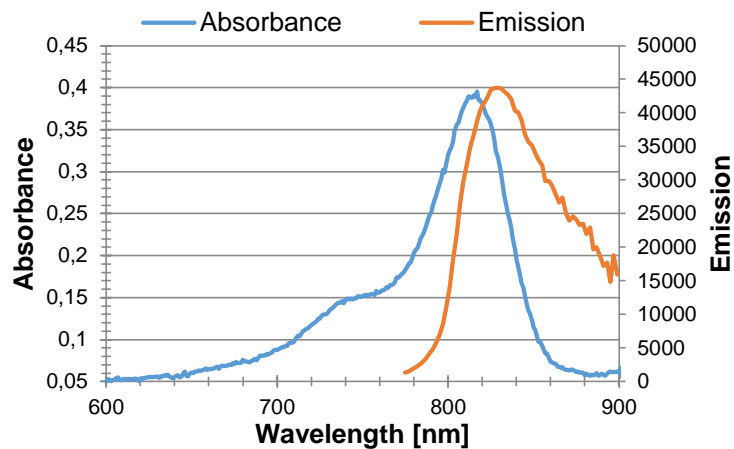

03-cwm-dk10 #53-279 RT: 0.55-2.43 AV: 28 NL: 3.00E6  
F: FTMS + p ESI Full ms [200.00-2000.00]

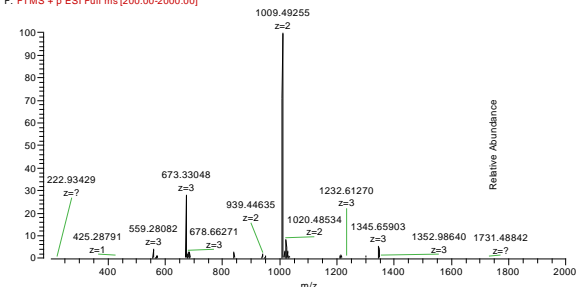

03-cwm-dk10 #53-279 RT: 0.55-2.43 AV: 28 NL: 3.00E6  
F: FTMS + p ESI Full ms [200.00-2000.00]

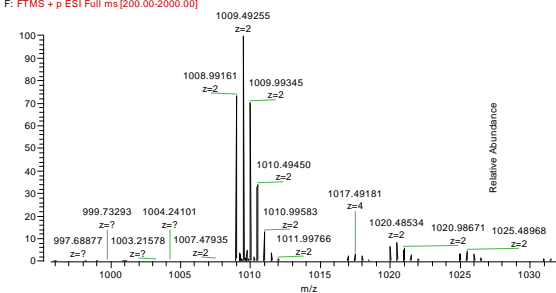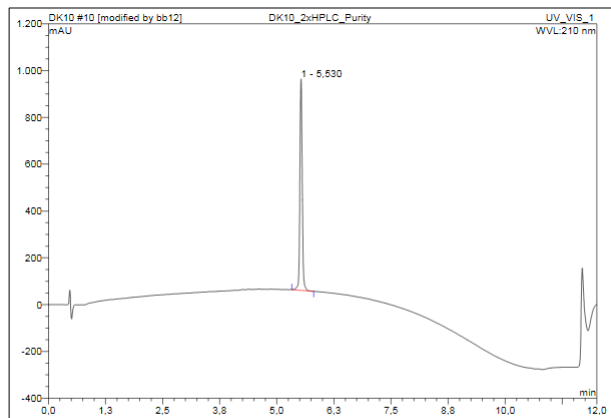

| No.           | Ret. Time min | Peak Name | Height mAU | Area mAU*min | Rel. Area % | Amount | Type |
|---------------|---------------|-----------|------------|--------------|-------------|--------|------|
| 1             | 5.53          | n.a.      | 902.925    | 54.295       | 100.00      | n.a.   | BMB* |
| <b>Total:</b> |               |           | 902.925    | 54.295       | 100.00      | 0.000  |      |

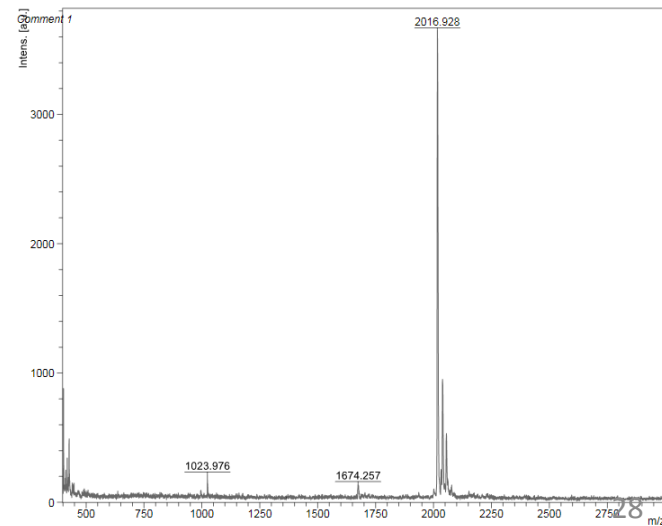

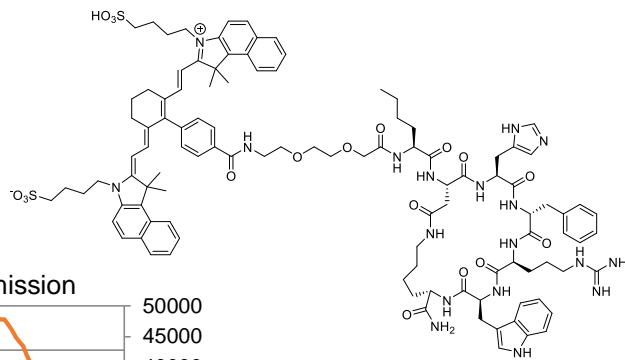

probe P3 in DMSO (1  $\mu$ M)

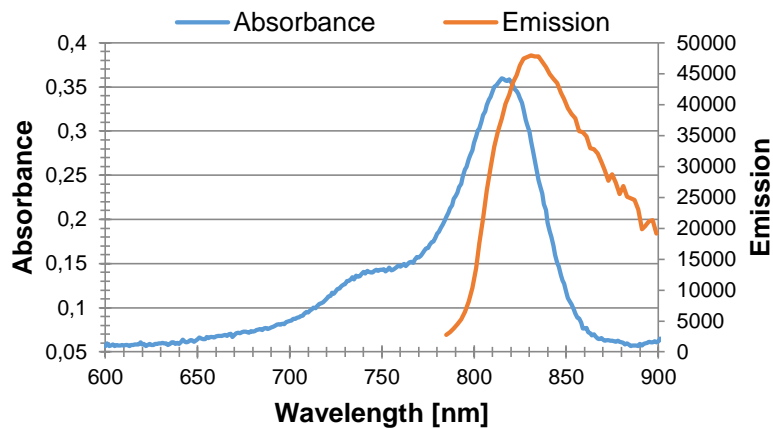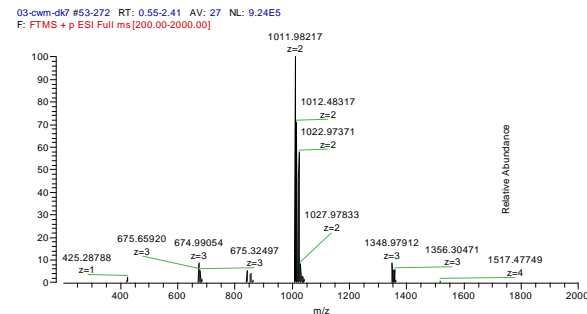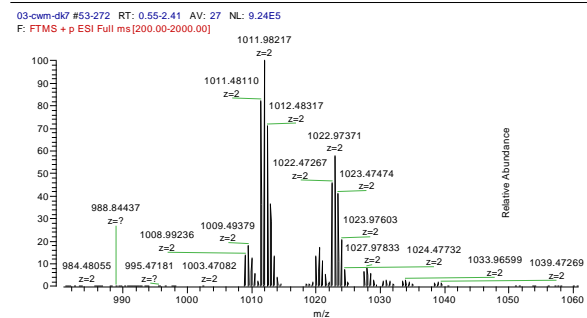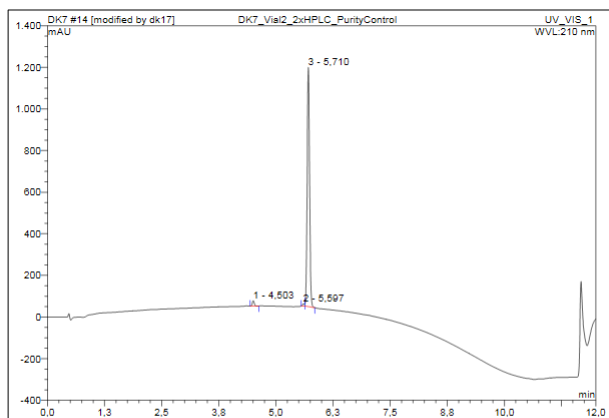

| No.           | Ret.Time min | Peak Name | Height mAU | Area mAU*min | Rel.Area % | Amount | Type |
|---------------|--------------|-----------|------------|--------------|------------|--------|------|
| 1             | 4,50         | n.a.      | 24,748     | 1,223        | 1,69       | n.a.   | BMB* |
| 2             | 5,60         | n.a.      | 9,145      | 0,562        | 0,78       | n.a.   | BM * |
| 3             | 5,71         | n.a.      | 1149,851   | 70,534       | 97,53      | n.a.   | MB*  |
| <b>Total:</b> |              |           | 1183,745   | 72,319       | 100,00     | 0,000  |      |

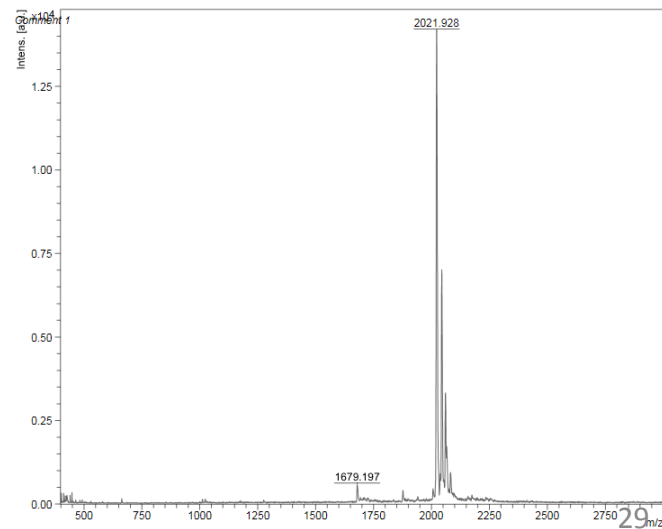

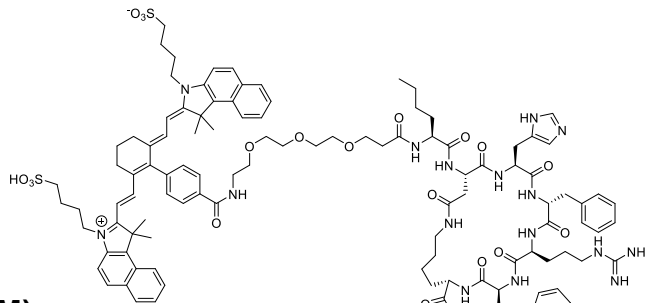

probe P4 in DMSO (1 μM)

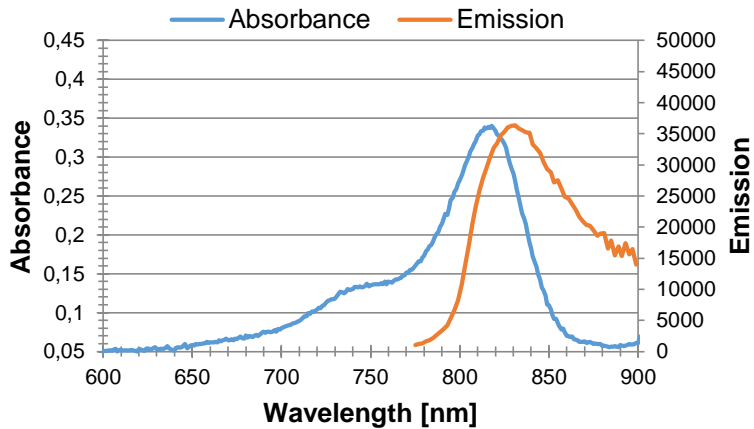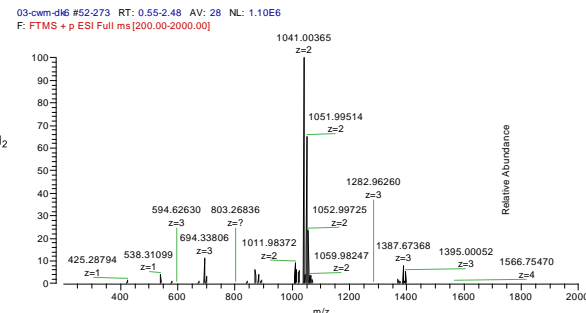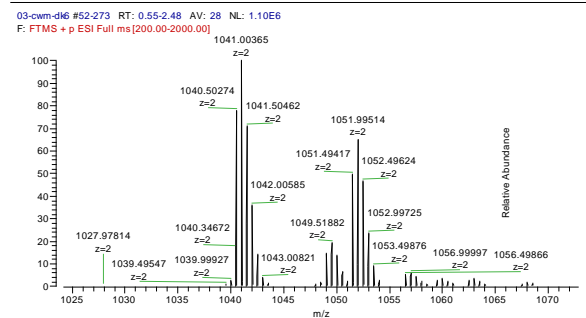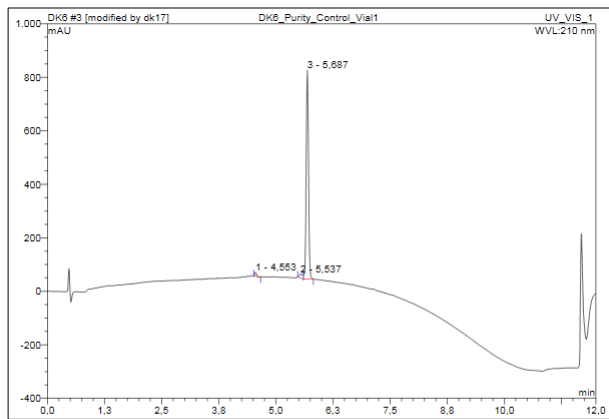

| No.           | Ret.Time min | Peak Name | Height mAU | Area mAU*min | Rel.Area % | Amount | Type |
|---------------|--------------|-----------|------------|--------------|------------|--------|------|
| 1             | 4,55         | n.a.      | 14,330     | 0,564        | 1,17       | n.a.   | BMB* |
| 2             | 5,54         | n.a.      | 12,970     | 1,347        | 2,79       | n.a.   | BM * |
| 3             | 5,69         | n.a.      | 780,042    | 46,361       | 96,04      | n.a.   | MB*  |
| <b>Total:</b> |              |           | 807,343    | 48,273       | 100,00     | 0,000  |      |

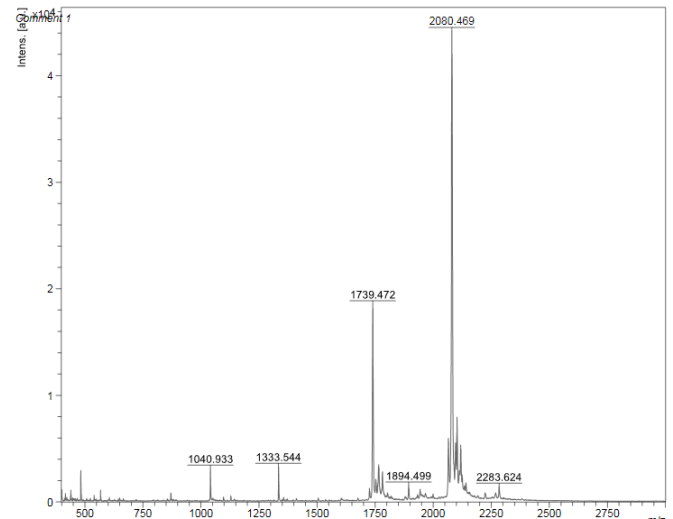

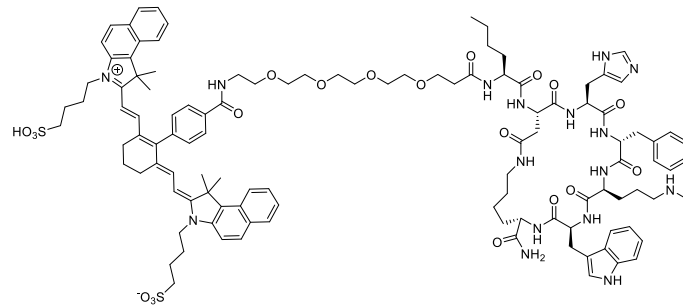

probe P5 in DMSO (1  $\mu$ M)

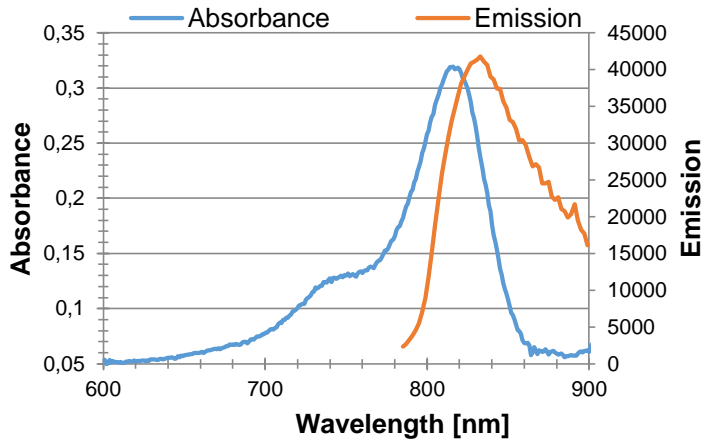

03-cwm-DK14 #52-285 RT: 0.55-2.45 AV: 29 NL: 1.63E7  
F: FTMS + p ESI Full ms [200.00-2000.00]

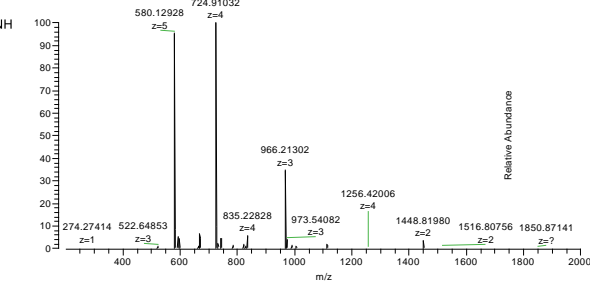

03-cwm-DK14 #52-285 RT: 0.55-2.45 AV: 29 NL: 1.63E7  
F: FTMS + p ESI Full ms [200.00-2000.00]

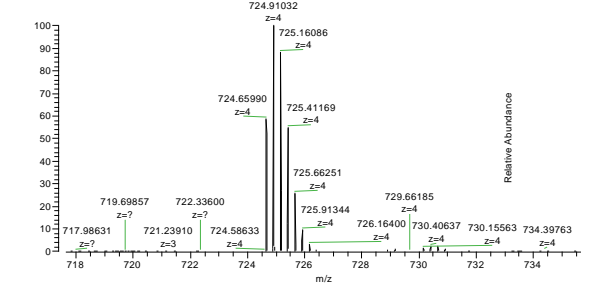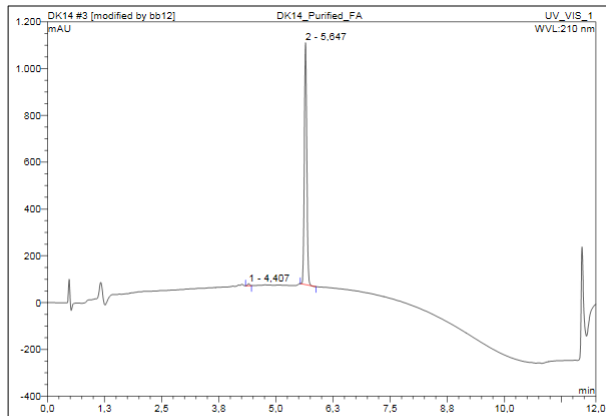

| No.           | Ret.Time min | Peak Name | Height mAU | Area mAU*min | Rel.Area % | Amount | Type |
|---------------|--------------|-----------|------------|--------------|------------|--------|------|
| 1             | 4,41         | n.a.      | 8,728      | 0,446        | 0,67       | n.a.   | BMB* |
| 2             | 5,65         | n.a.      | 1033,343   | 65,592       | 99,33      | n.a.   | BMB* |
| <b>Total:</b> |              |           | 1042,071   | 66,037       | 100,00     | 0,000  |      |

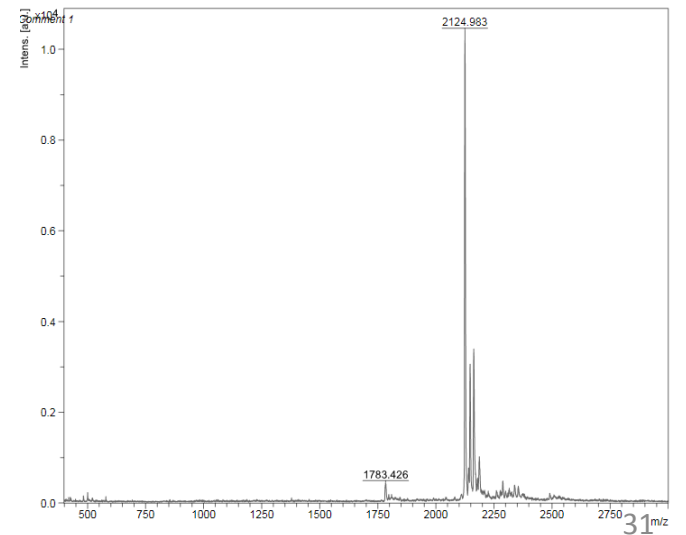

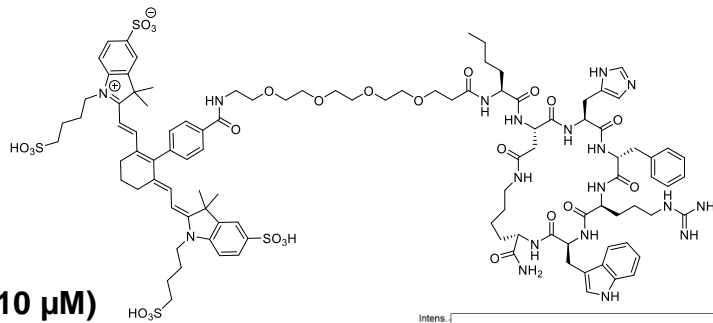

probe P6 in PBS (10  $\mu$ M)

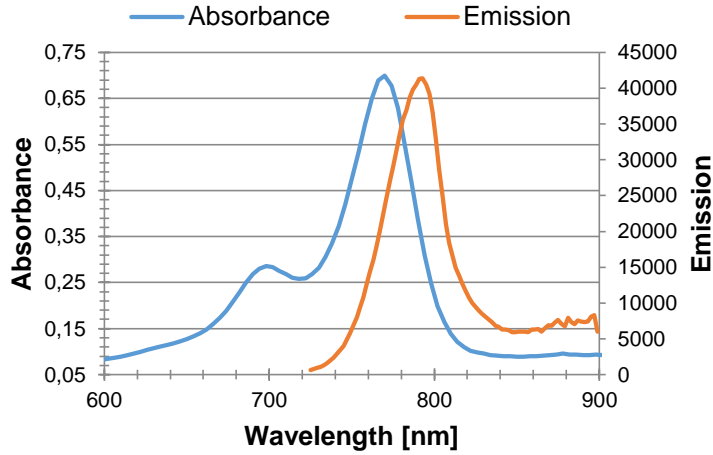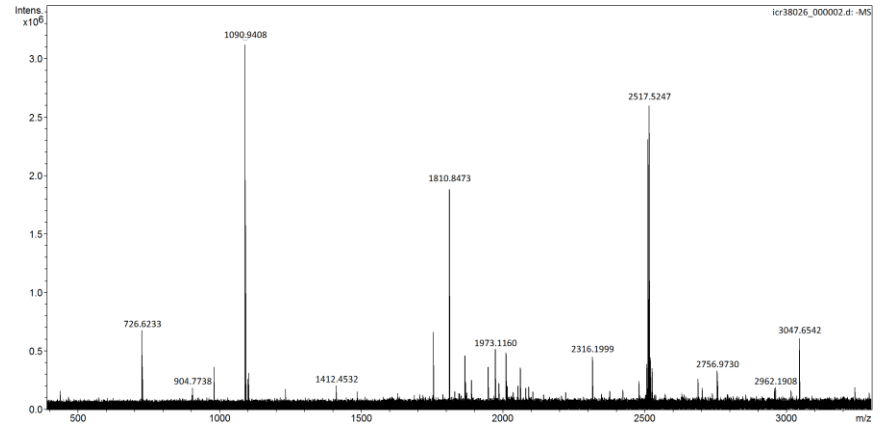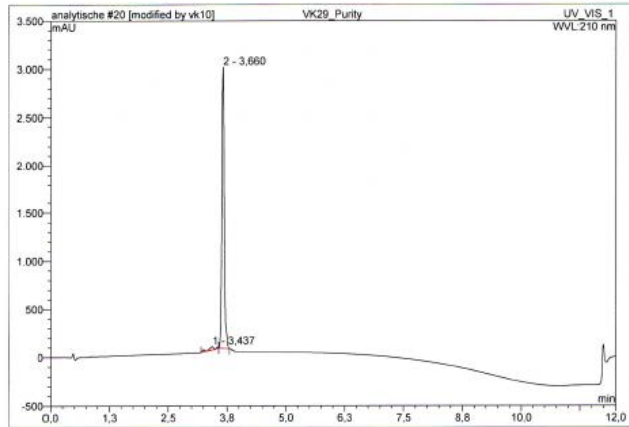

| No.           | Ret.Time min | Peak Name | Height mAU | Area mAU*min | Rel.Area % | Amount | Type |
|---------------|--------------|-----------|------------|--------------|------------|--------|------|
| 1             | 3.44         | n.a.      | 31.409     | 4.360        | 2.57       | n.a.   | BMB* |
| 2             | 3.66         | n.a.      | 2926.110   | 165.499      | 97.43      | n.a.   | bMB* |
| <b>Total:</b> |              |           | 2957.519   | 169.859      | 100.00     | 0.000  |      |

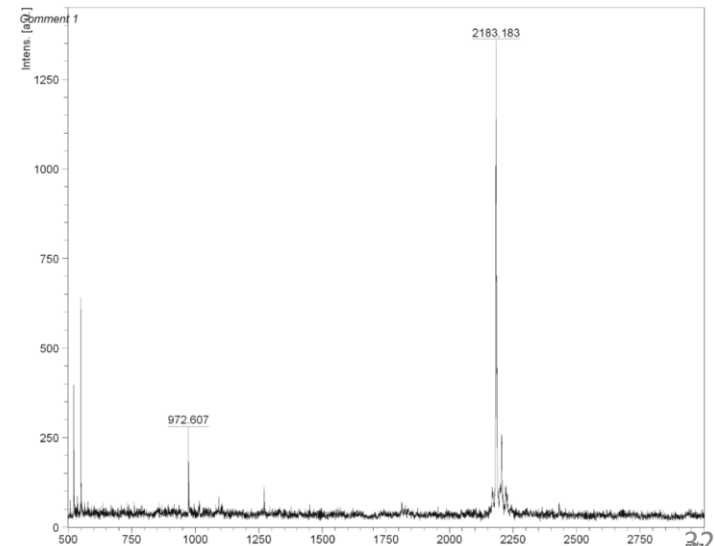



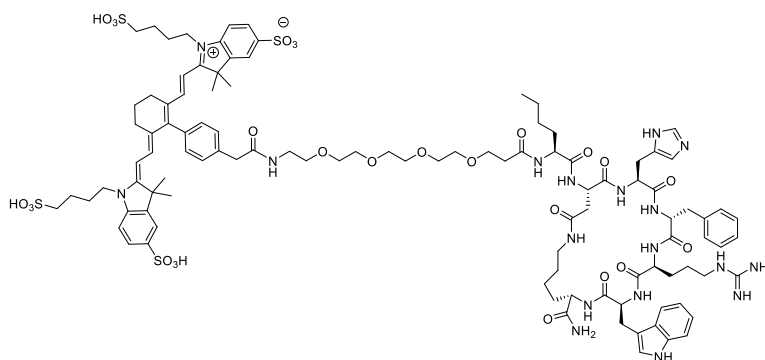

probe P7 in PBS (10  $\mu$ M)

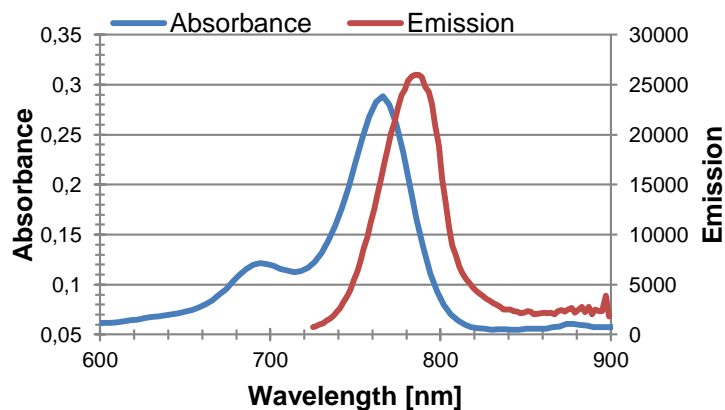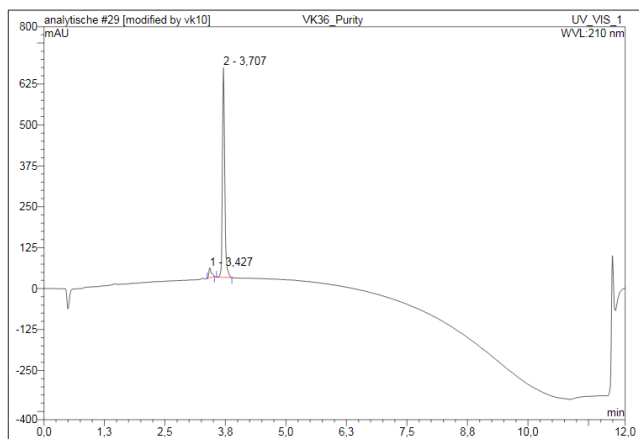

| No.           | Ret.Time min | Peak Name | Height mAU | Area mAU*min | Rel.Area % | Amount | Type |
|---------------|--------------|-----------|------------|--------------|------------|--------|------|
| 1             | 3.43         | n.a.      | 29,868     | 1,855        | 4,91       | n.a.   | BMB* |
| 2             | 3.71         | n.a.      | 640,543    | 35,955       | 95,09      | n.a.   | BMB* |
| <b>Total:</b> |              |           | 670,411    | 37,810       | 100,00     | 0,000  |      |

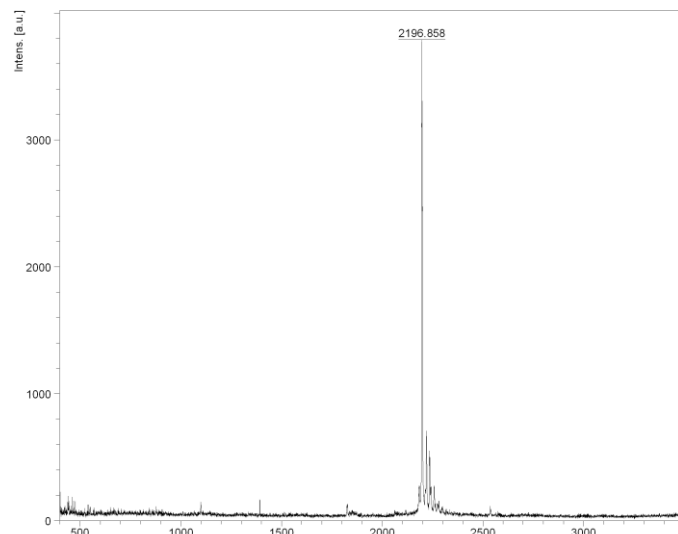

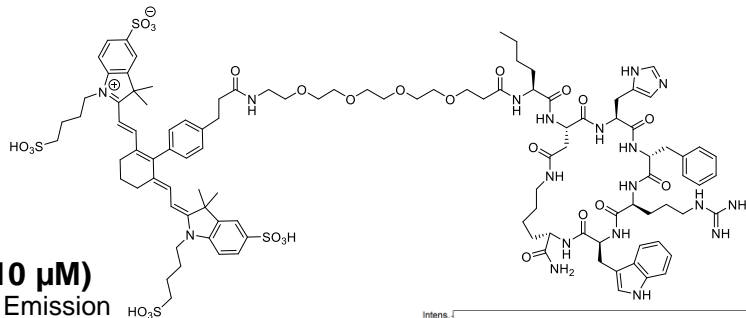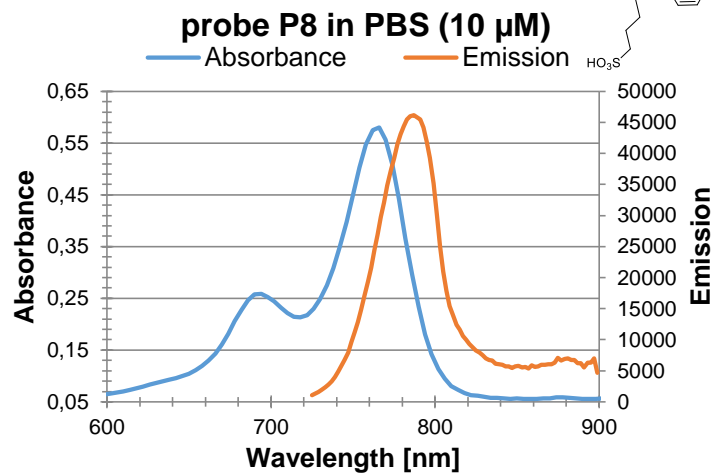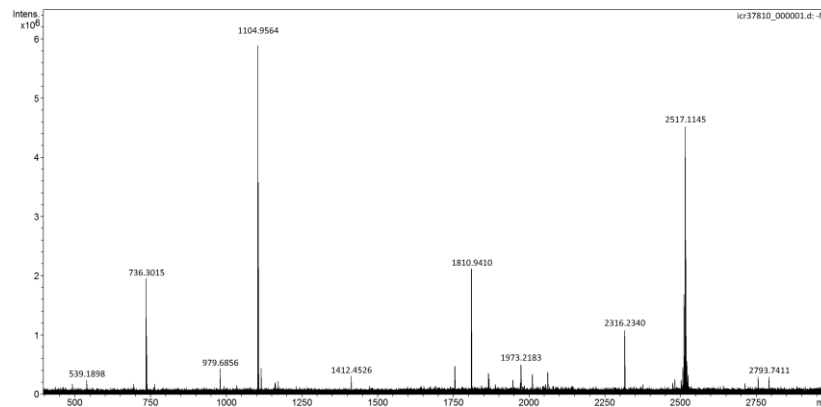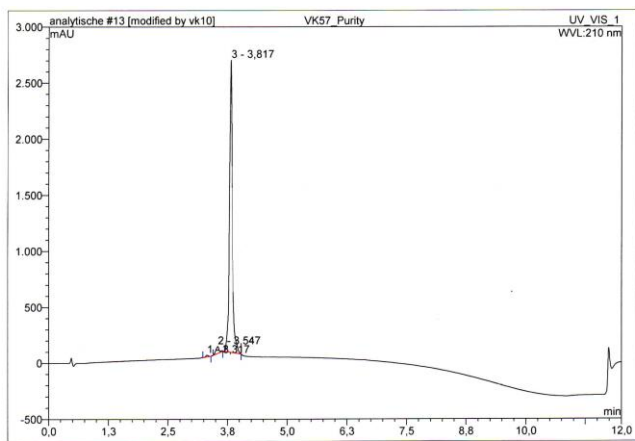

| No.           | Ret. Time min | Peak Name | Height mAU | Area mAU*min | Rel. Area % | Amount | Type |
|---------------|---------------|-----------|------------|--------------|-------------|--------|------|
| 1             | 3,32          | n.a.      | 14,907     | 0,710        | 0,37        | n.a.   | BMB* |
| 2             | 3,55          | n.a.      | 62,586     | 5,042        | 2,62        | n.a.   | BMB* |
| 3             | 3,82          | n.a.      | 2608,939   | 186,514      | 97,01       | n.a.   | BMB* |
| <b>Total:</b> |               |           | 2686,431   | 192,266      | 100,00      | 0,000  |      |

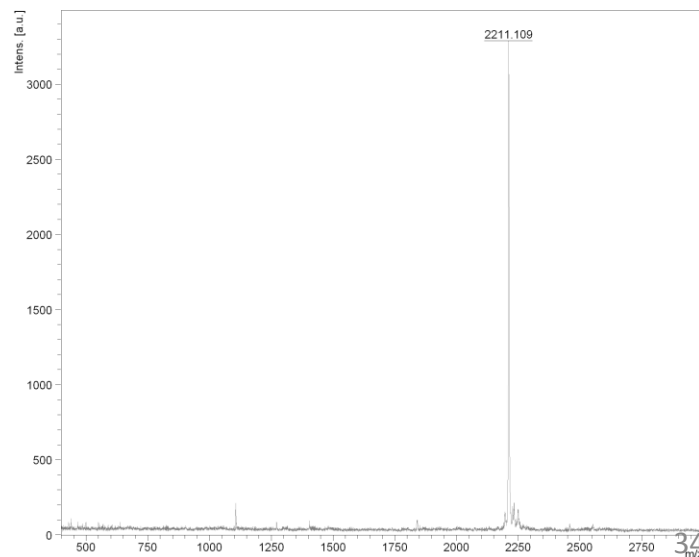

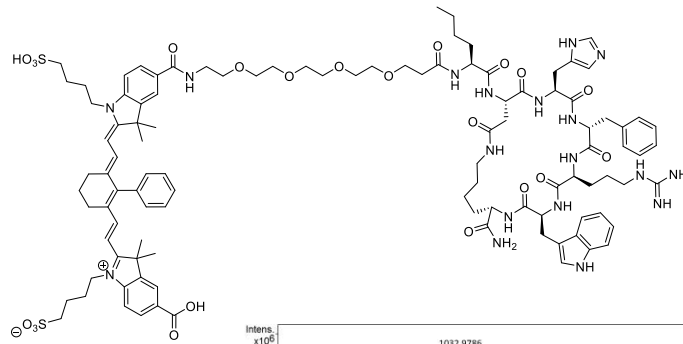

probe P9 in PBS (20  $\mu\text{M}$ )

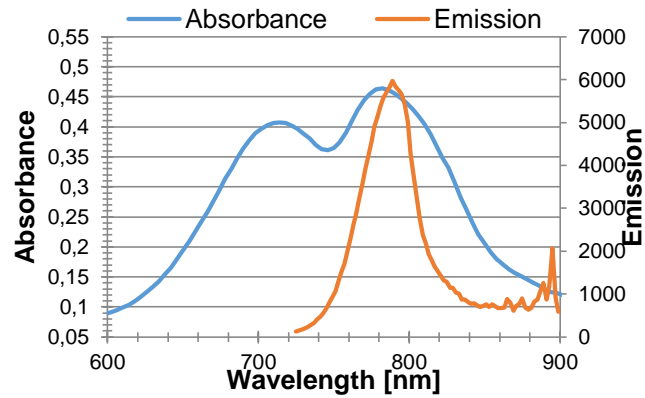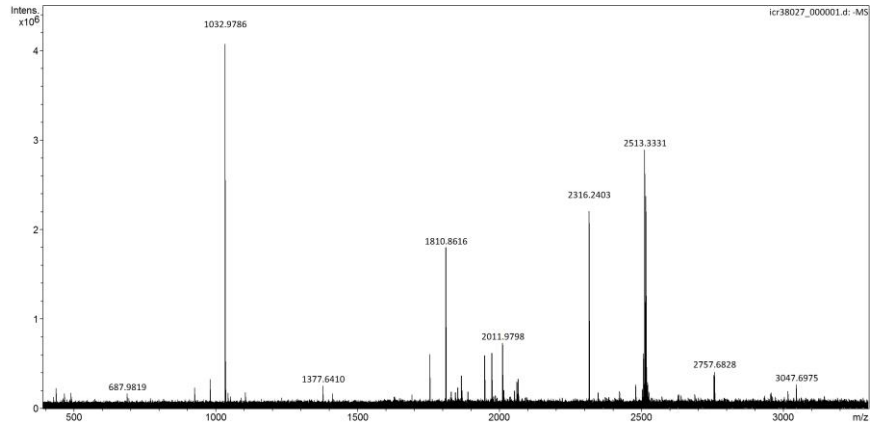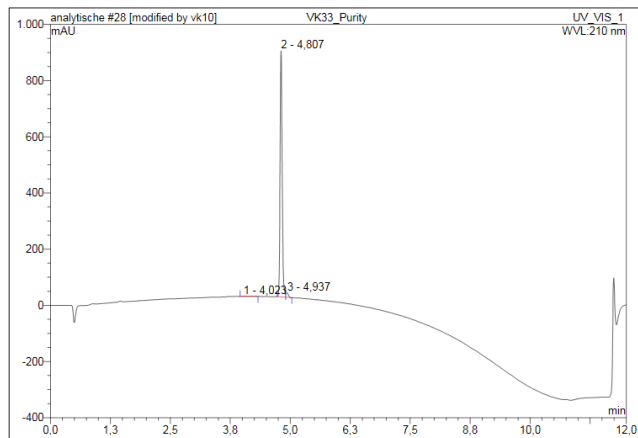

| No.           | Ret.Time min | Peak Name | Height mAU | Area mAU*min | Rel.Area % | Amount | Type |
|---------------|--------------|-----------|------------|--------------|------------|--------|------|
| 1             | 4,02         | n.a.      | 1,088      | 0,135        | 0,30       | n.a.   | BMB* |
| 2             | 4,81         | n.a.      | 876,267    | 44,783       | 97,74      | n.a.   | BM * |
| 3             | 4,94         | n.a.      | 15,632     | 0,898        | 1,96       | n.a.   | MB*  |
| <b>Total:</b> |              |           | 892,986    | 45,817       | 100,00     | 0,000  |      |

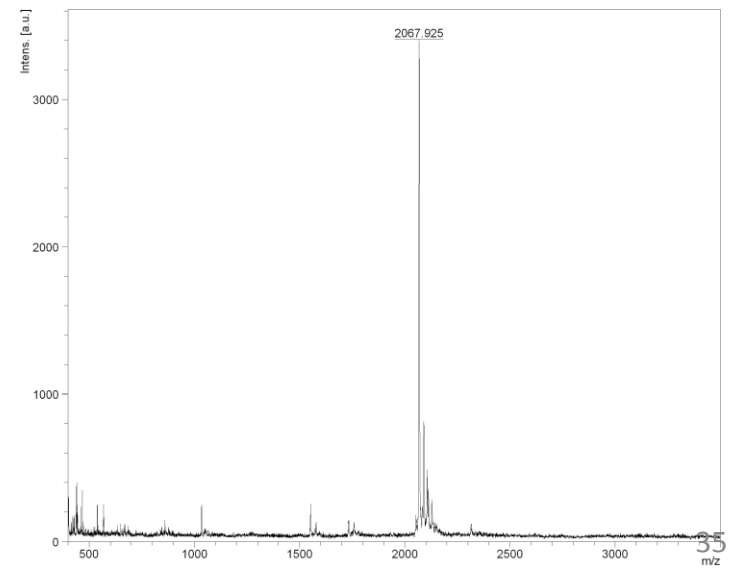

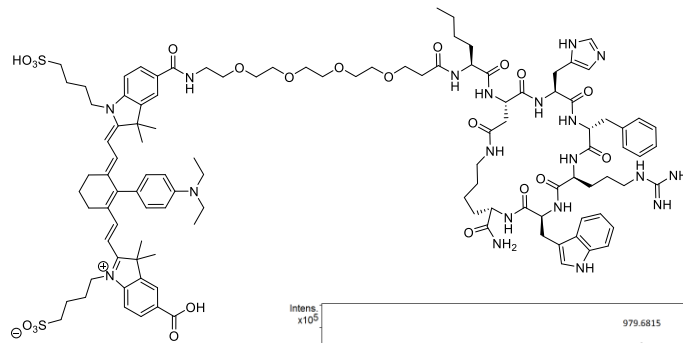

**probe P10 in PBS (20  $\mu$ M)**  
 — Absorbance — Emission

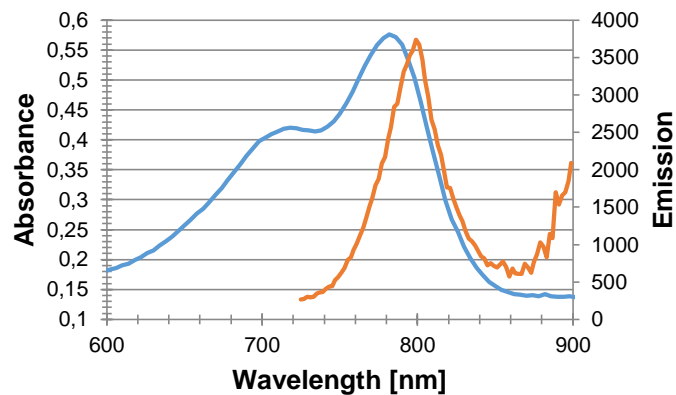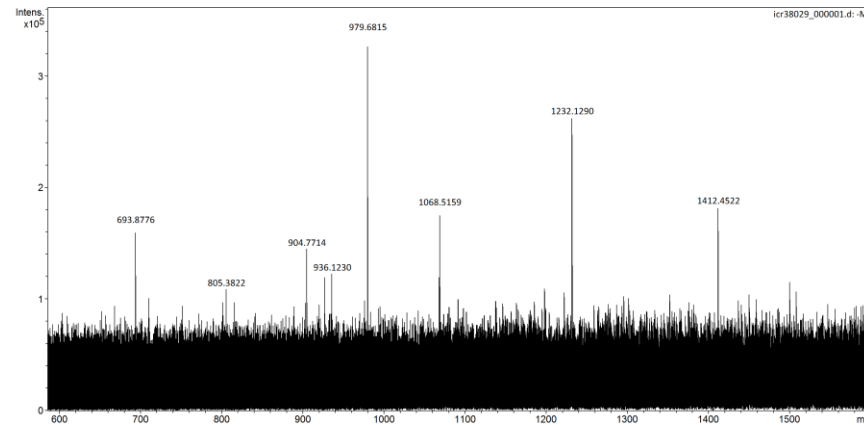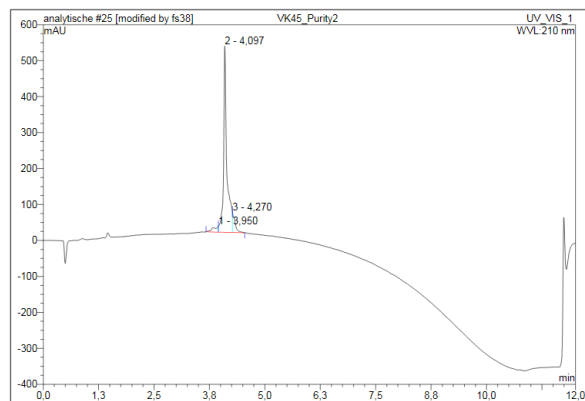

| No.           | Ret.Time min | Peak Name | Height mAU | Area mAU*min | Rel.Area % | Amount | Type |
|---------------|--------------|-----------|------------|--------------|------------|--------|------|
| 1             | 3.95         | n.a.      | 16.125     | 2,106        | 4,18       | n.a.   | BM * |
| 2             | 4.10         | n.a.      | 517,984    | 44,517       | 88,44      | n.a.   | M *  |
| 3             | 4.27         | n.a.      | 54,583     | 3,713        | 7,38       | n.a.   | MB*  |
| <b>Total:</b> |              |           | 588,692    | 50,336       | 100,00     | 0,000  |      |

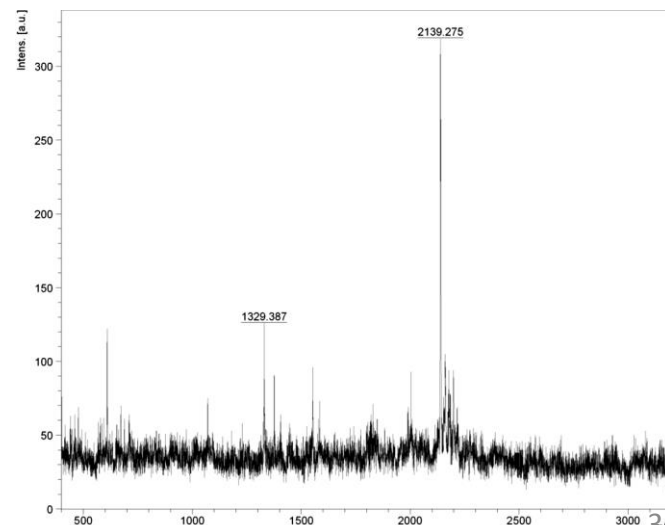

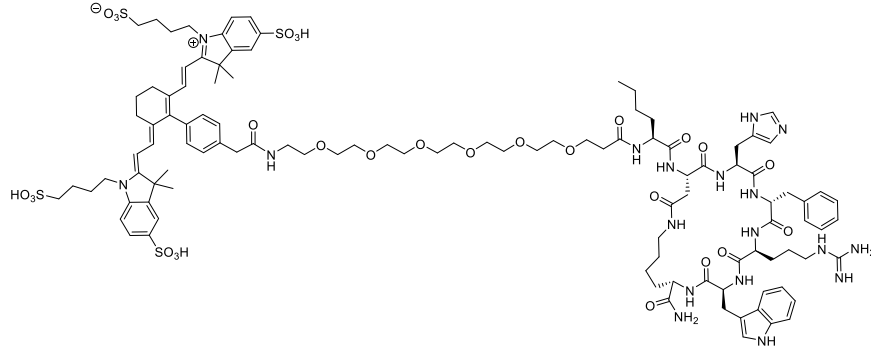

probe 11 in PBS (10  $\mu$ M)

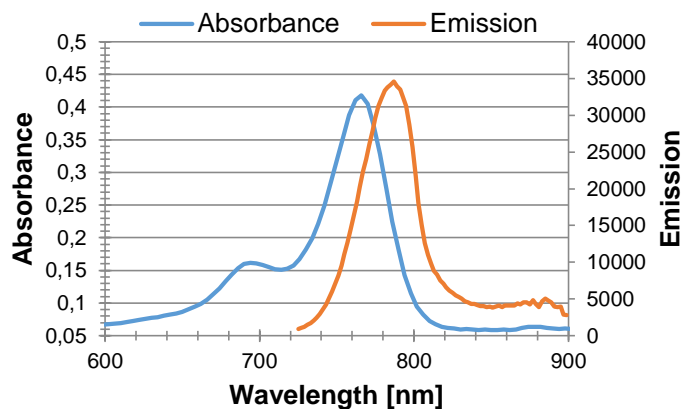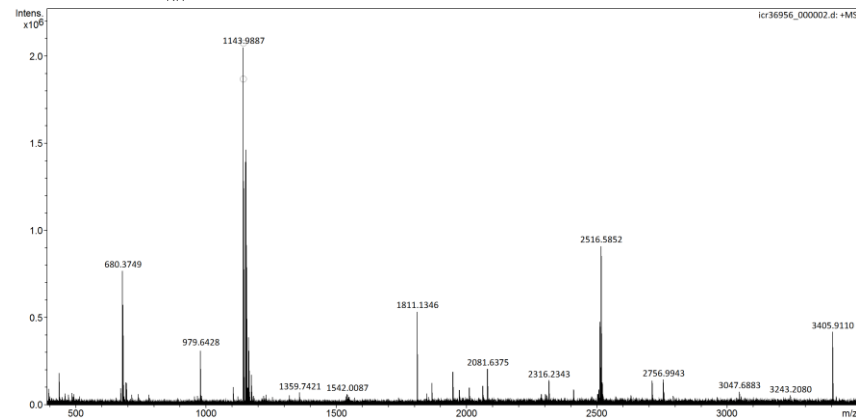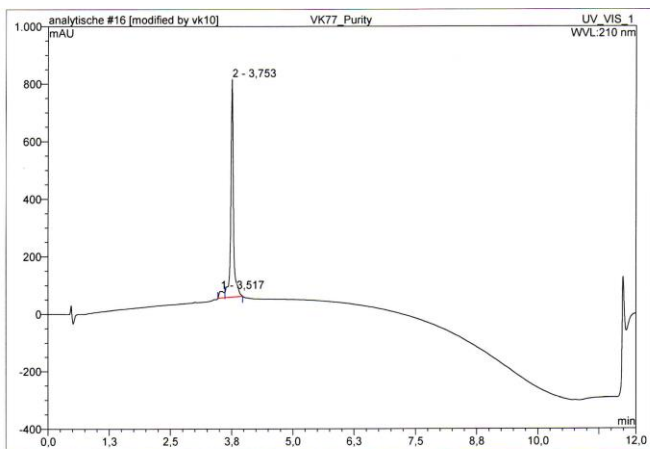

| No.           | Ret.Time min | Peak Name | Height mAU | Area mAU*min | Rel.Area % | Amount | Type |
|---------------|--------------|-----------|------------|--------------|------------|--------|------|
| 1             | 3,52         | n.a.      | 23,550     | 2,547        | 4,94       | n.a.   | BM * |
| 2             | 3,75         | n.a.      | 756,113    | 49,052       | 95,06      | n.a.   | MB*  |
| <b>Total:</b> |              |           | 779,664    | 51,598       | 100,00     | 0,000  |      |

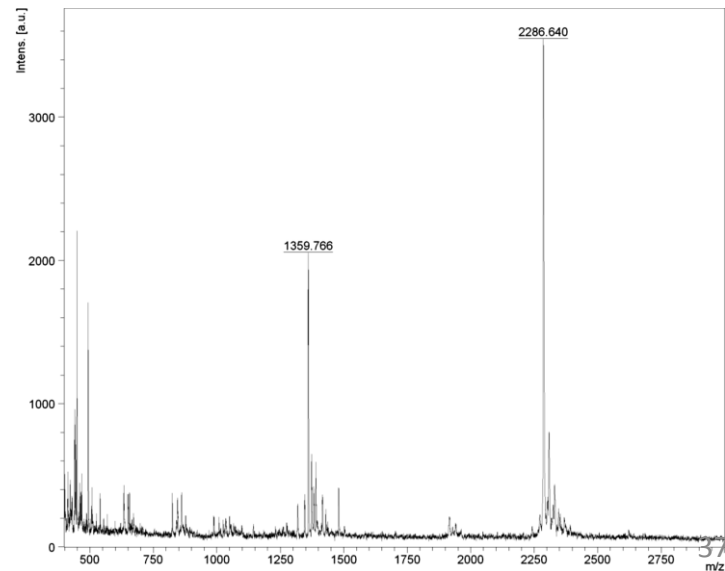

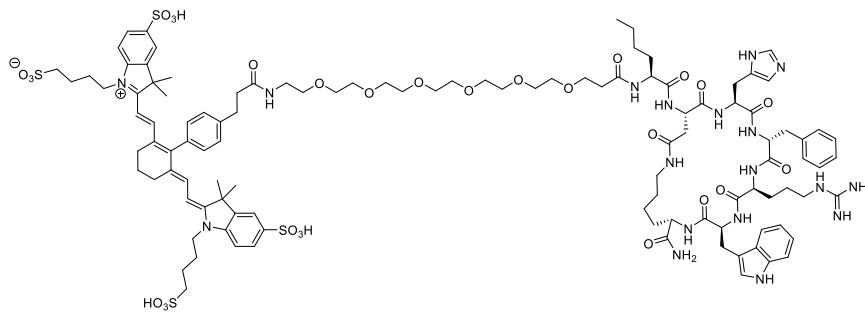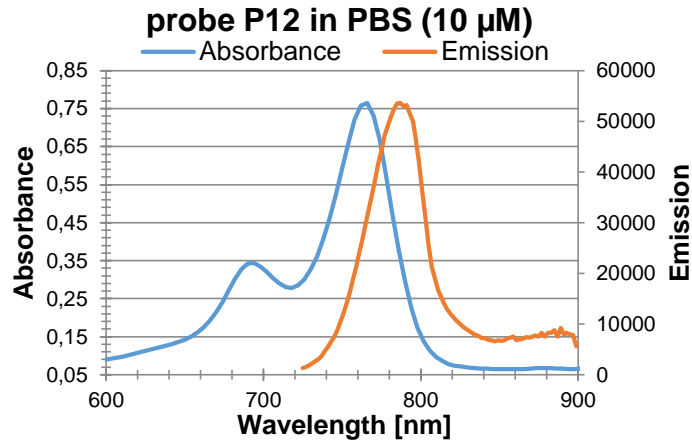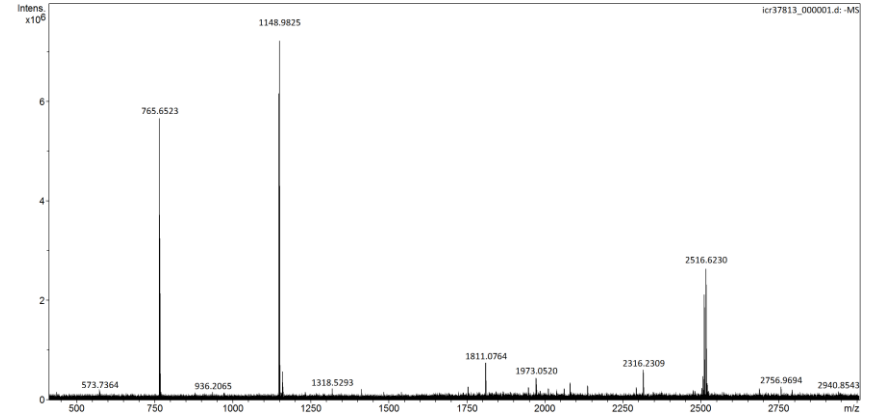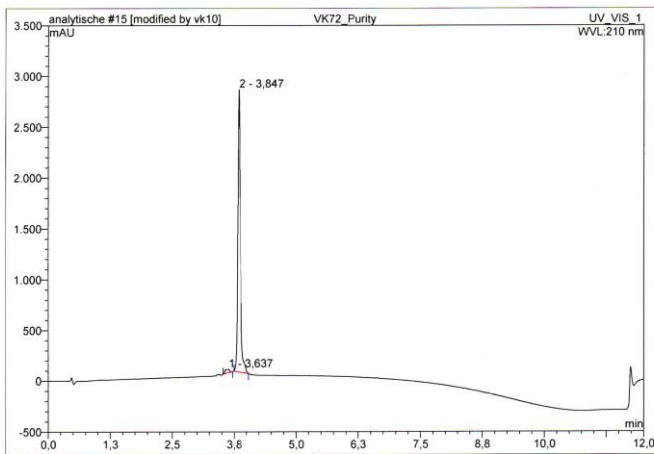

| No.           | Ret.Time min | Peak Name | Height mAU | Area mAU*min | Rel.Area % | Amount | Type |
|---------------|--------------|-----------|------------|--------------|------------|--------|------|
| 1             | 3,64         | n.a.      | 30,533     | 3,502        | 2,04       | n.a.   | BMB* |
| 2             | 3,85         | n.a.      | 2779,216   | 167,922      | 97,96      | n.a.   | BMB* |
| <b>Total:</b> |              |           | 2809,749   | 171,424      | 100,00     | 0,000  |      |

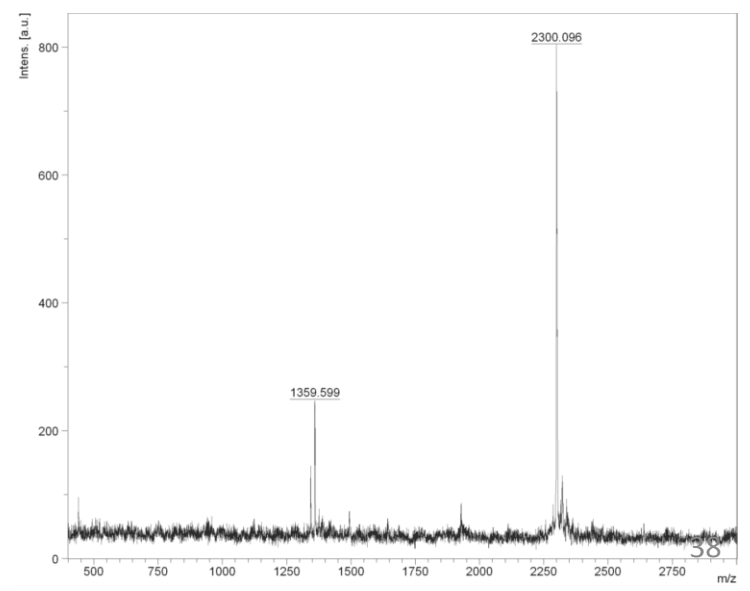

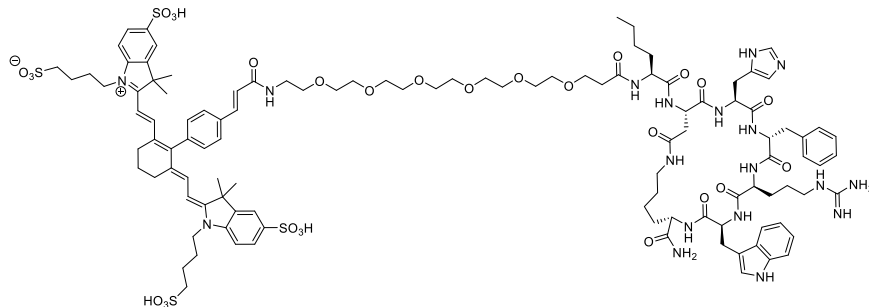

probe P13 in PBS (10  $\mu\text{M}$ )

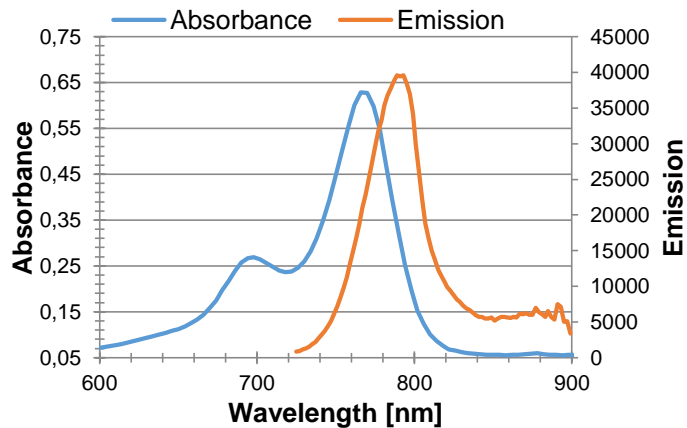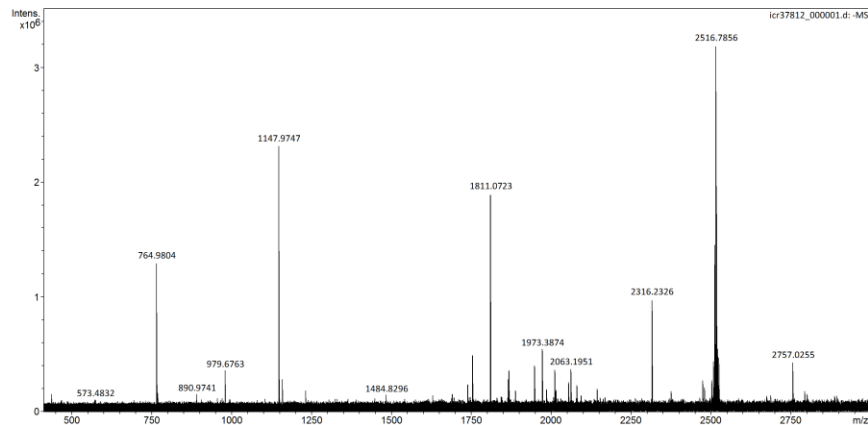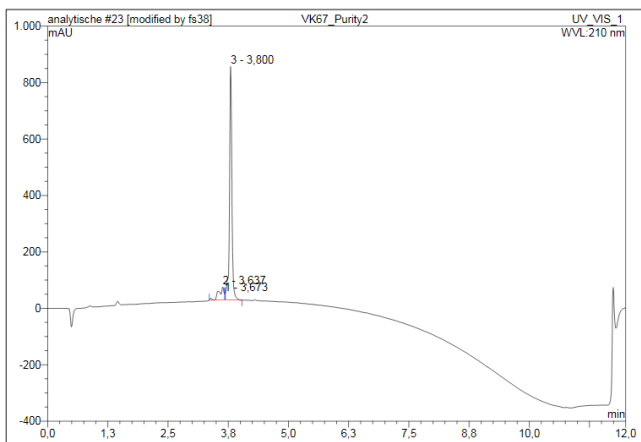

| No.           | Ret.Time min | Peak Name | Height mAU | Area mAU*min | Rel.Area % | Amount | Type |
|---------------|--------------|-----------|------------|--------------|------------|--------|------|
| 1             | 3.67         | n.a.      | 0,000      | 0,000        | 0,00       | n.a.   | Ru*  |
| 2             | 3.64         | n.a.      | 45,258     | 5,571        | 10,29      | n.a.   | BM * |
| 3             | 3.80         | n.a.      | 827,727    | 48,545       | 89,71      | n.a.   | MB*  |
| <b>Total:</b> |              |           | 872,985    | 54,116       | 100,00     | 0,000  |      |

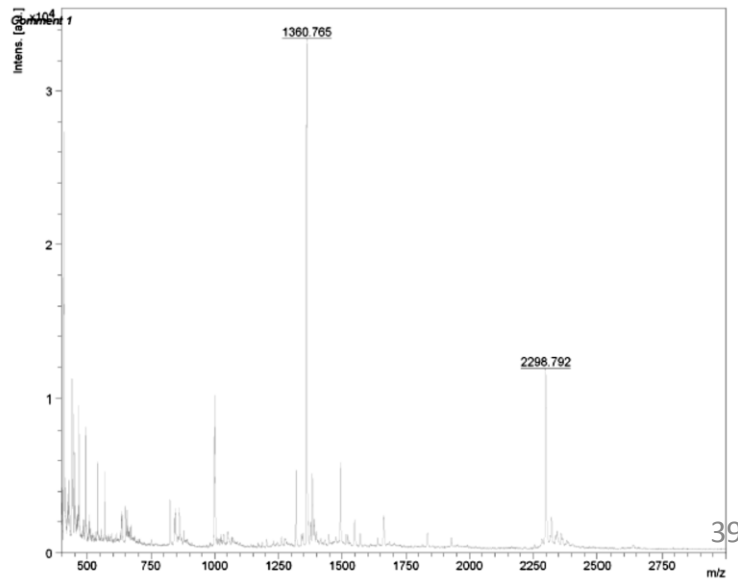

Supplement: d0tb01798a2.pdf [file d0tb01798a2.pdf]
